# Supplementary material
Source: publisher figshare collection journal article supplement (https://gsajournals.figshare.com/articles/dataset/_/7166009)

**Figure S5:** Sporulation kinetics for all strains

**Strain UWOPS87\_2421**

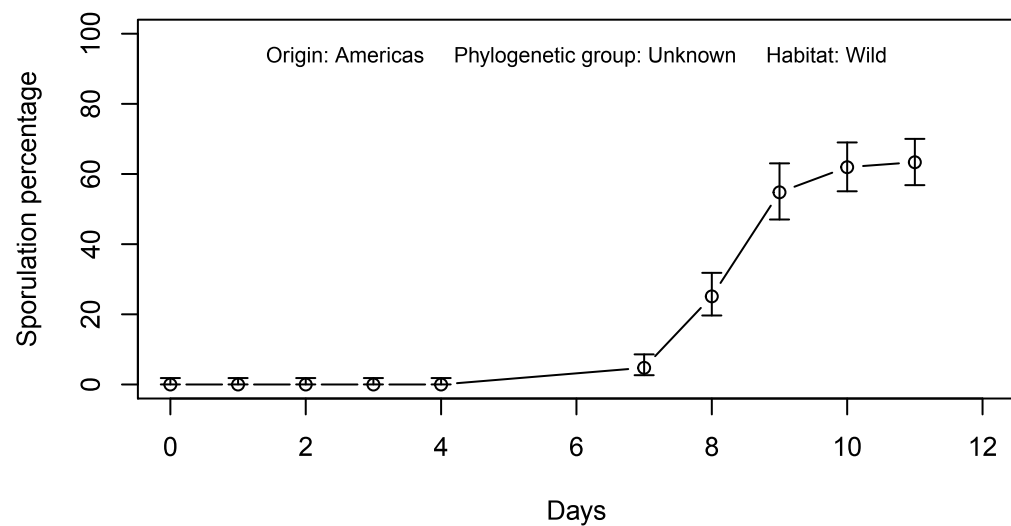

**Strain W303**

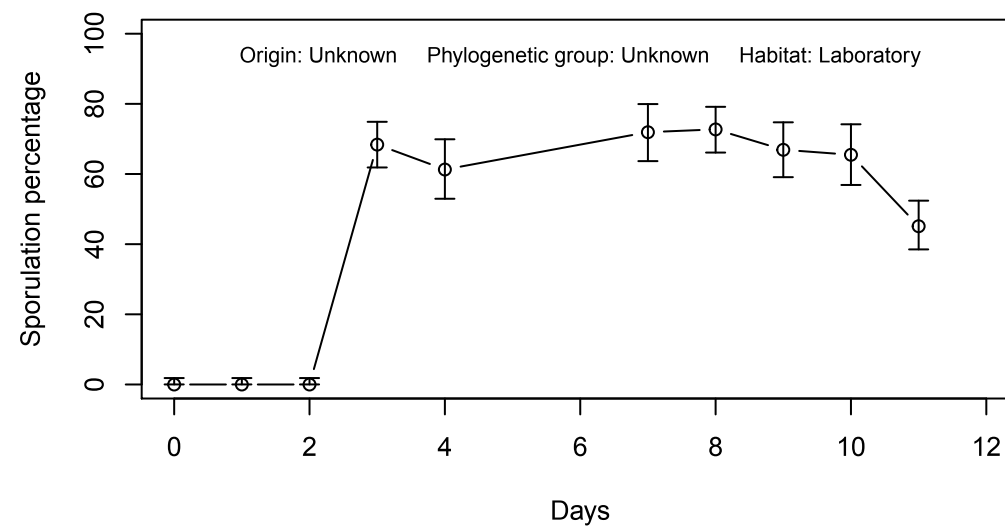

**Strain YS9**

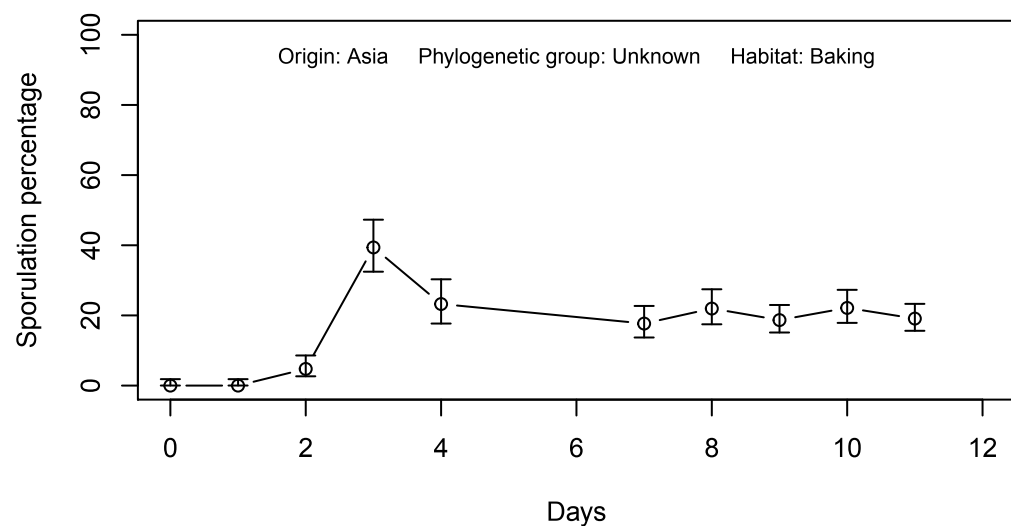

**Strain 273614N**

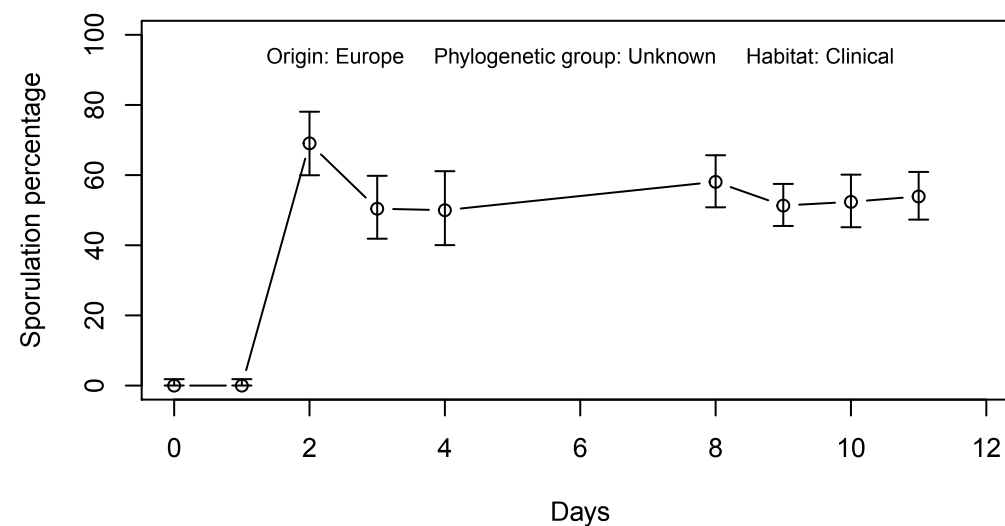

**Strain Yllc17\_E5**

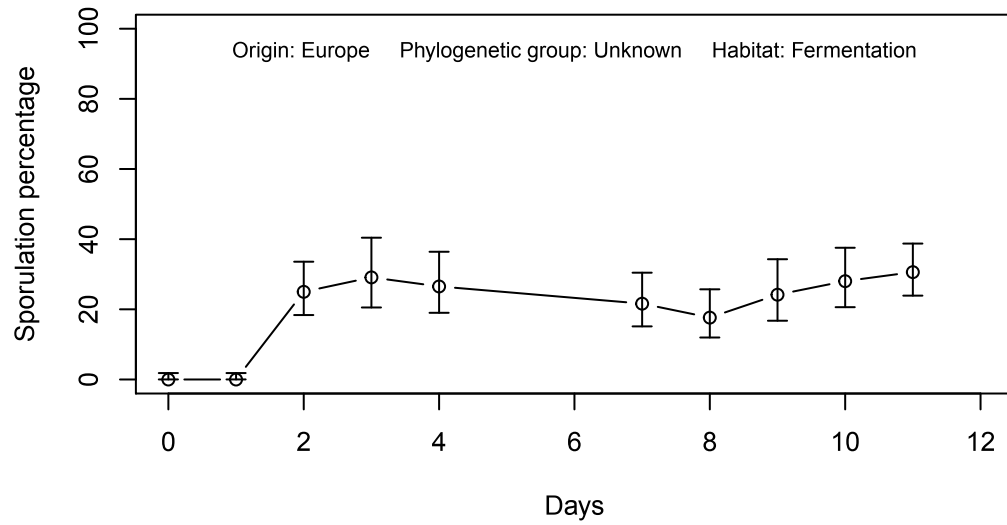

**Strain 322134S**

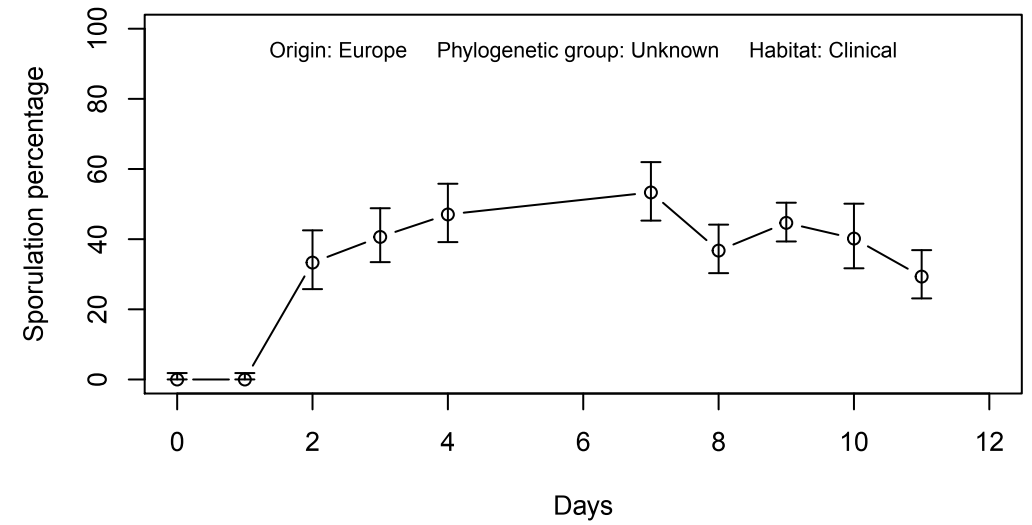

**Strain Y55**

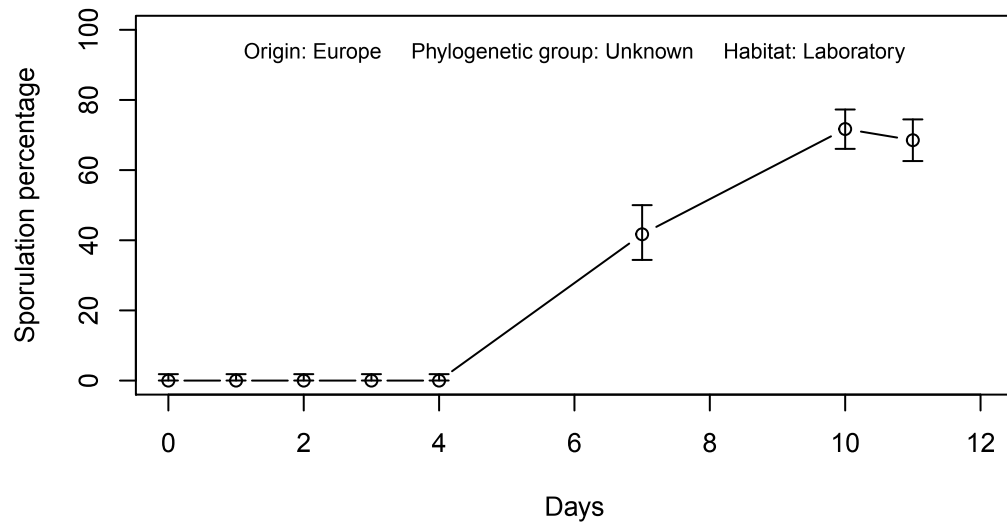

**Strain UWOPS83\_787\_3**

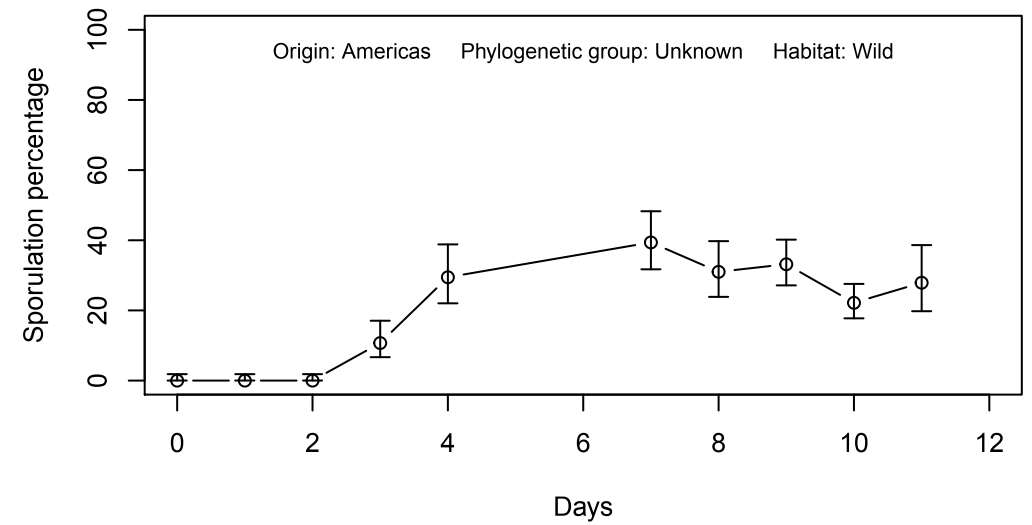

**Strain SK1**

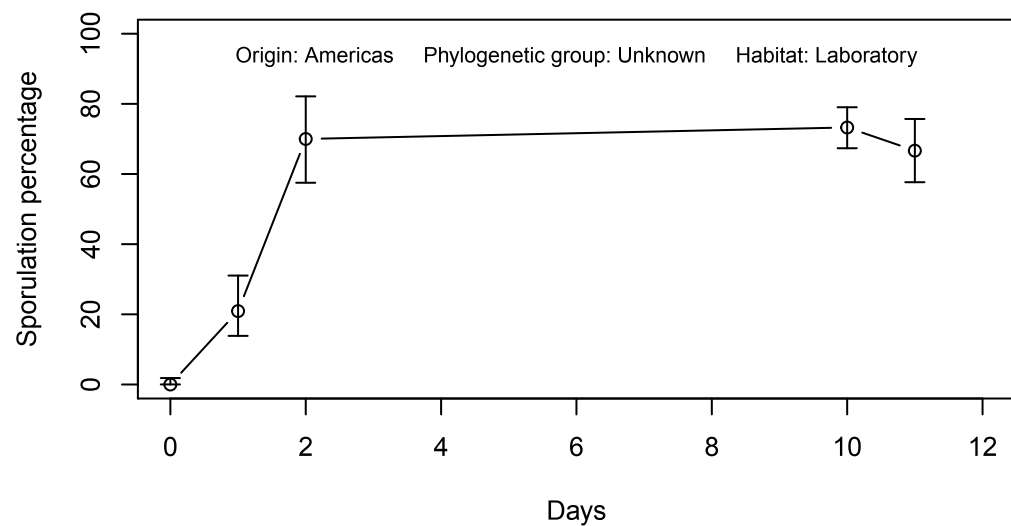

**Strain BC187**

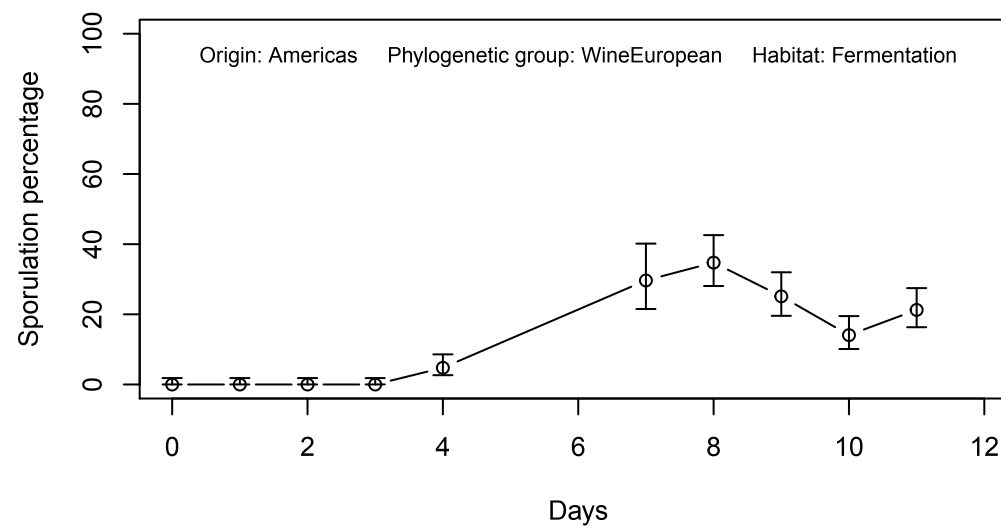

**Strain YJM978**

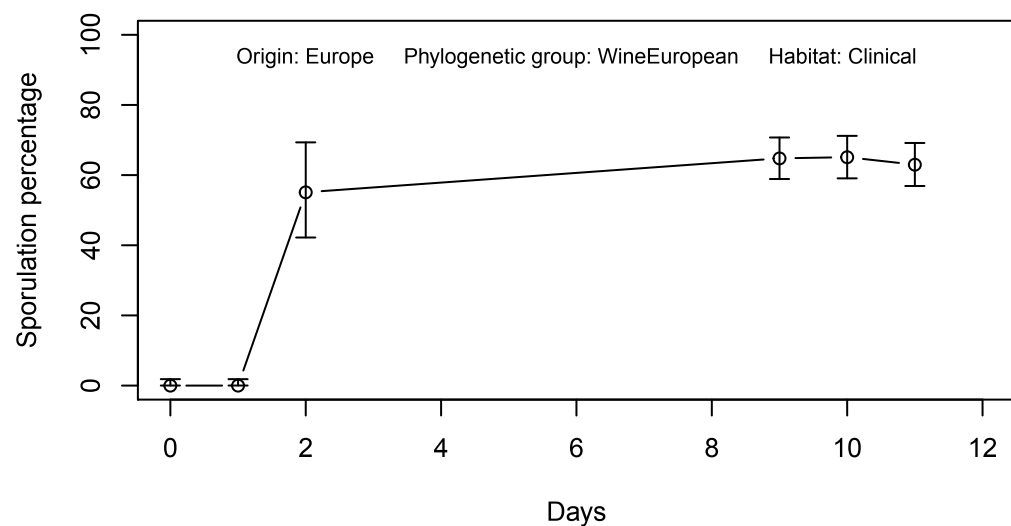

**Strain YJM981**

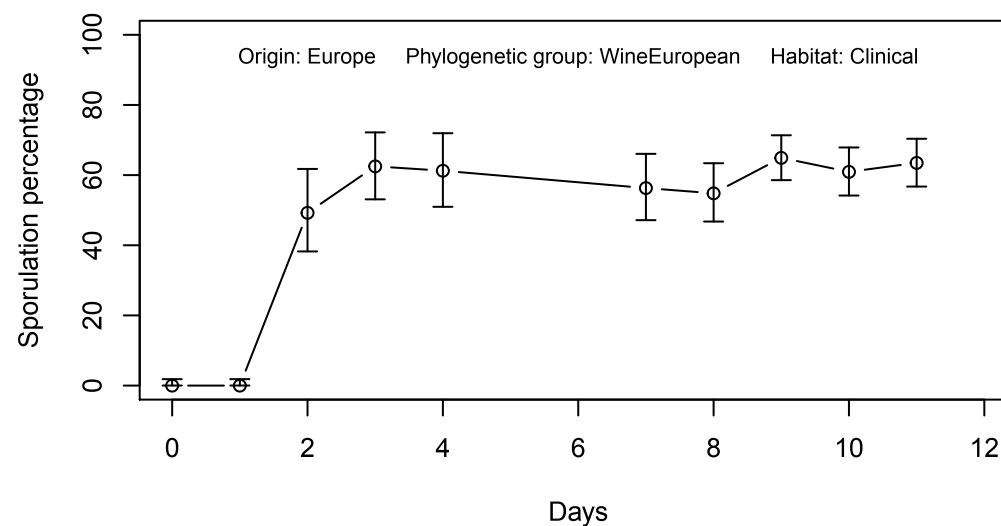

**Strain YJM975**

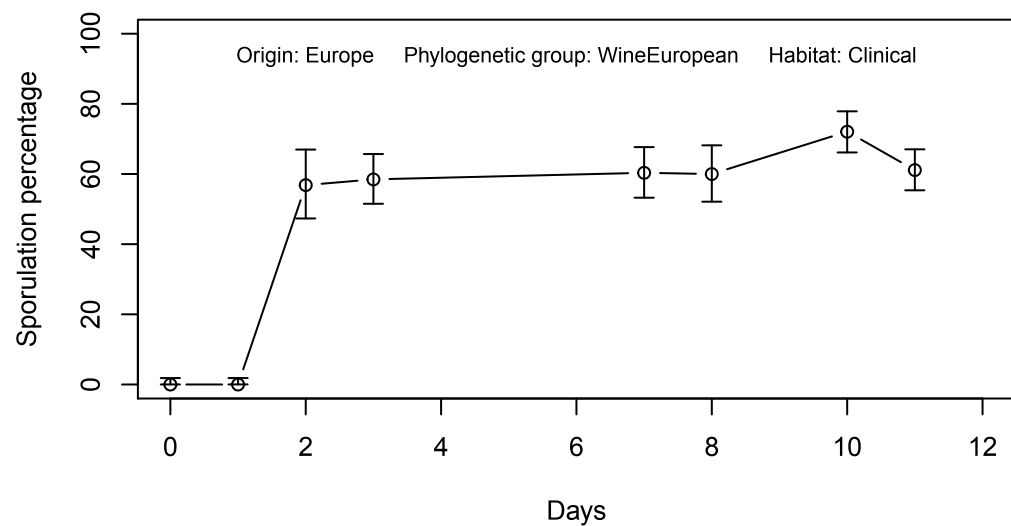

**Strain DBVPG1373**

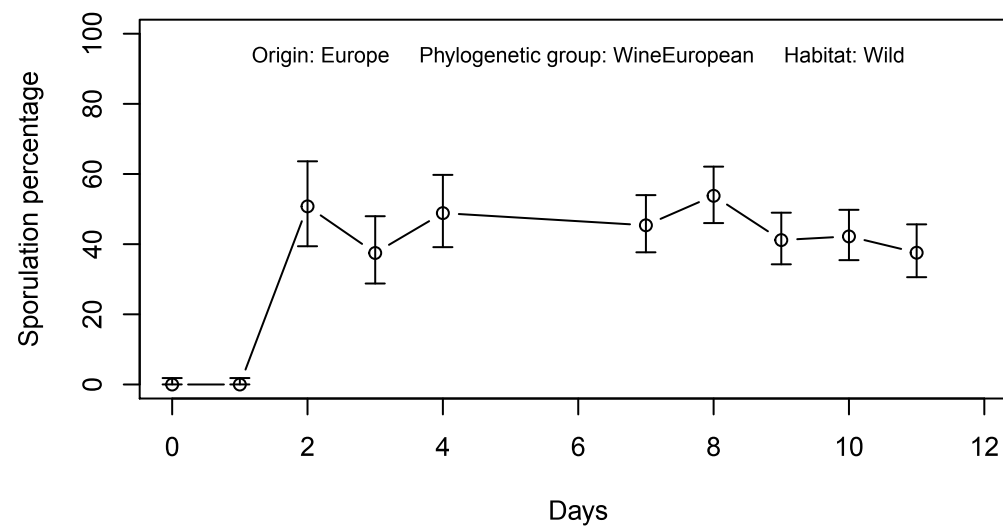

**Strain DBVPG1106**

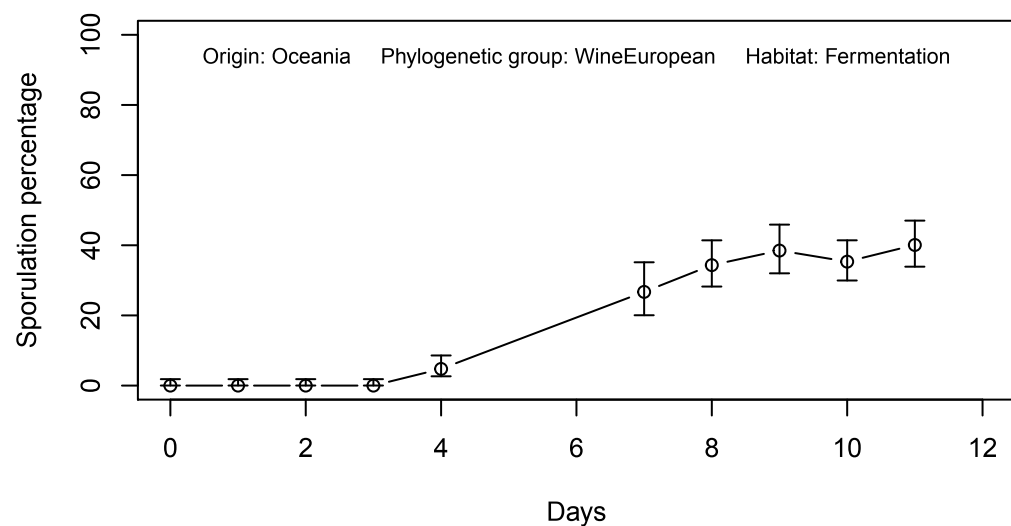

**Strain DBVPG6765**

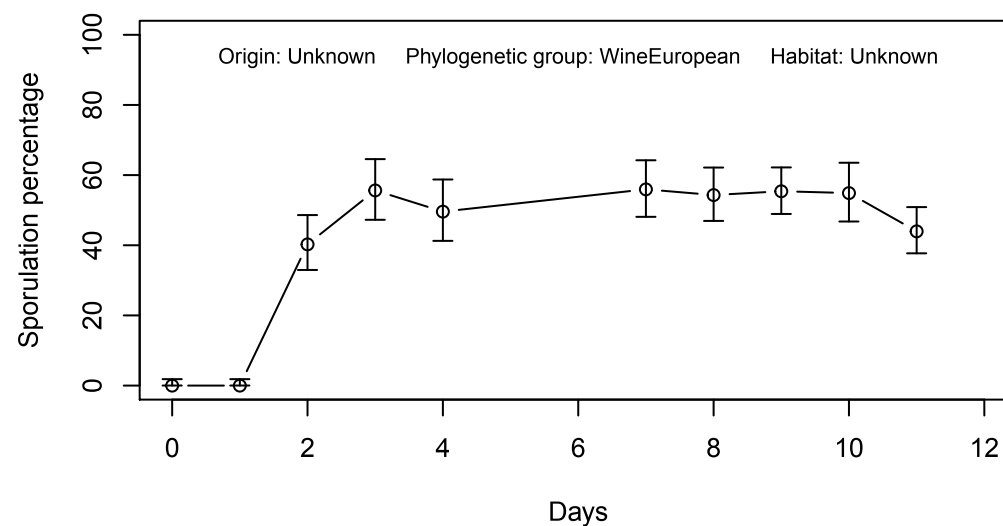

**Strain L\_1374**

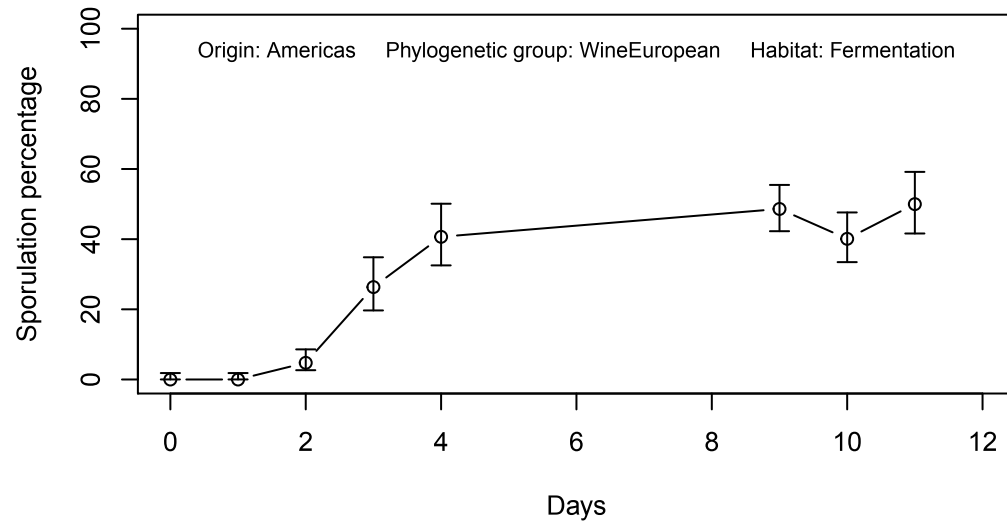

**Strain L\_1528**

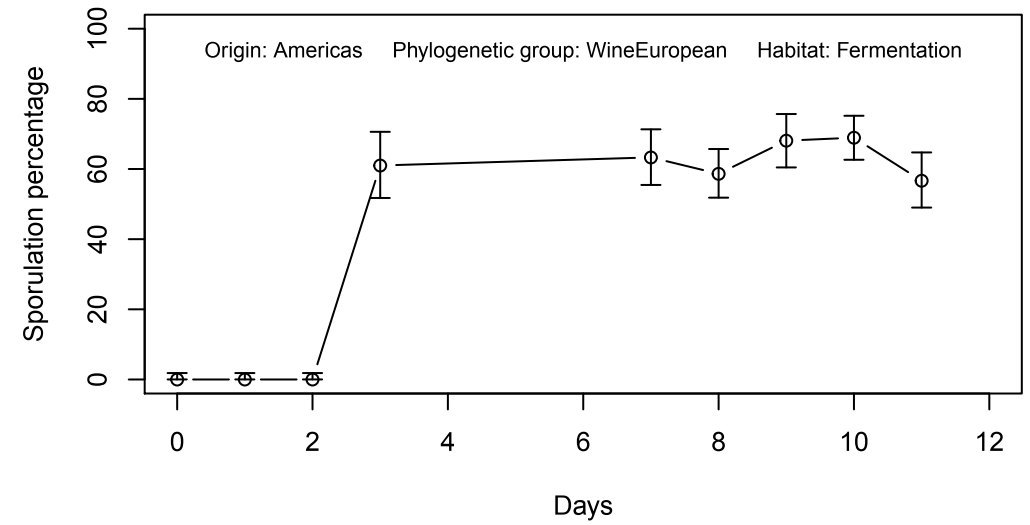

**Strain DBVPG6044**

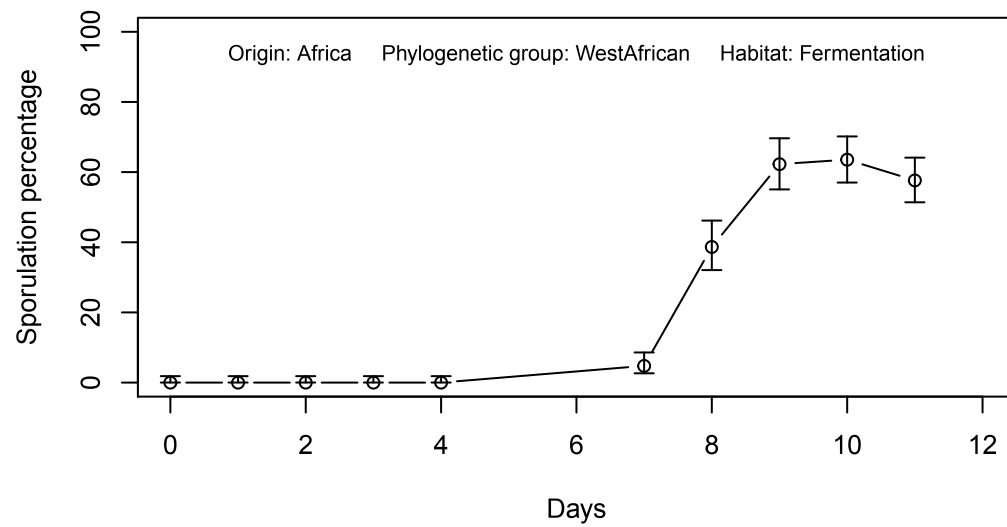

**Strain NCYC110**

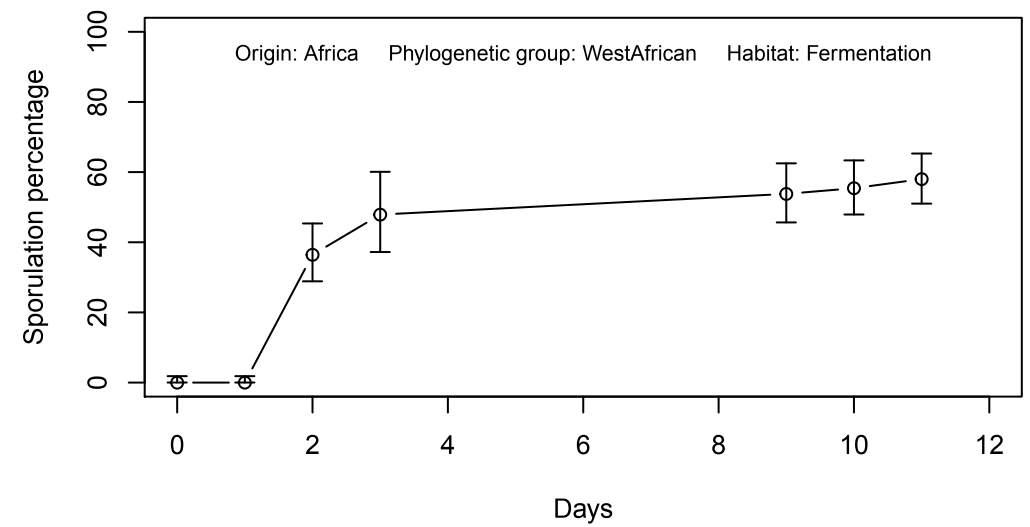

**Strain UWOPS03\_461\_4**

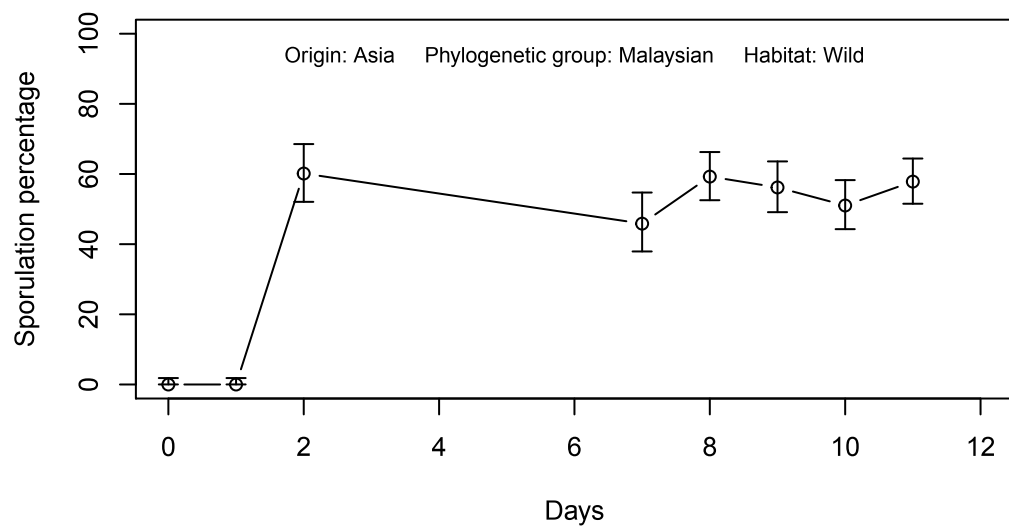

**Strain UWOPS05\_217\_3**

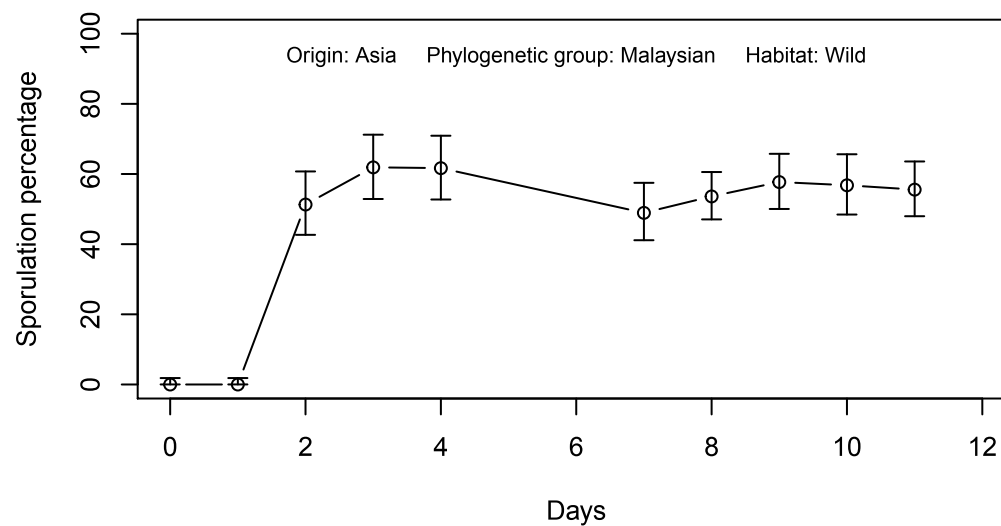

**Strain UWOPS05\_227\_2**

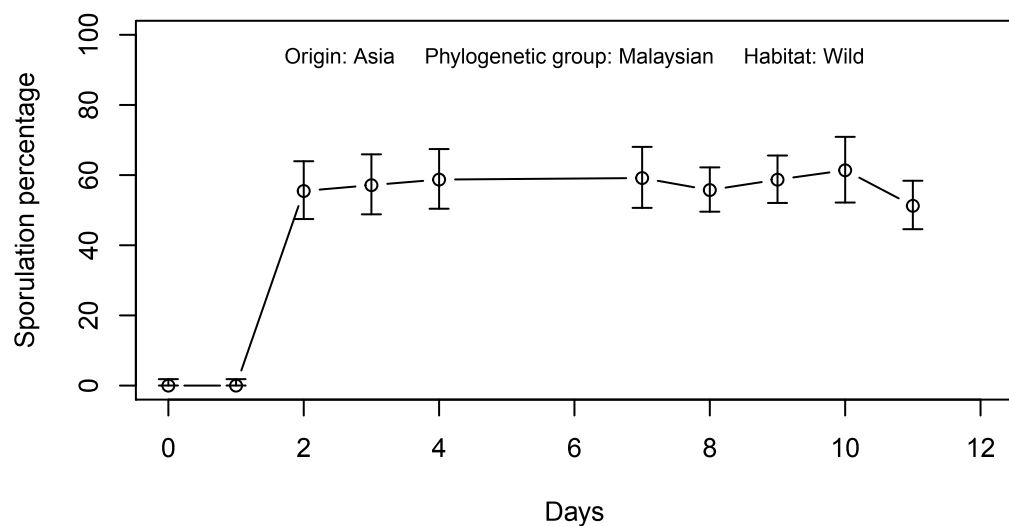

**Strain Y12**

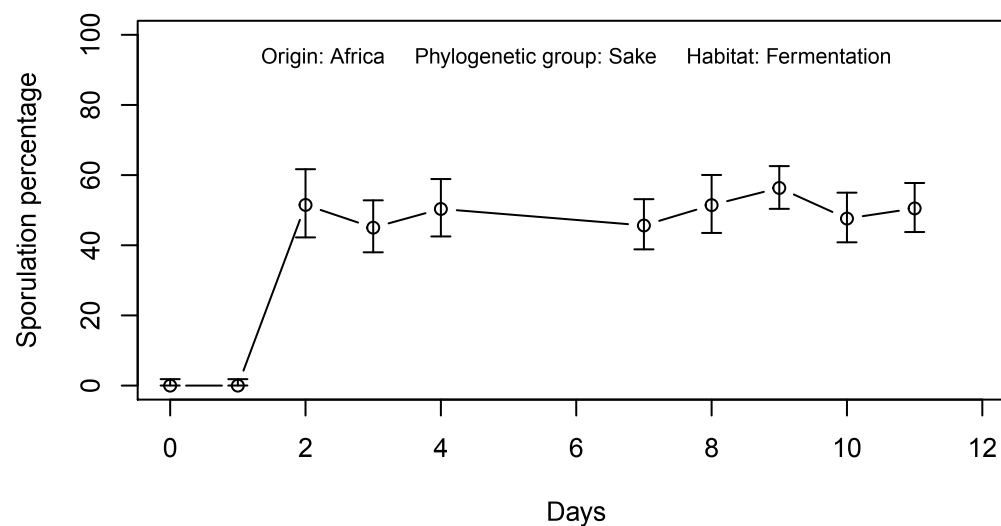

**Strain YPS606**

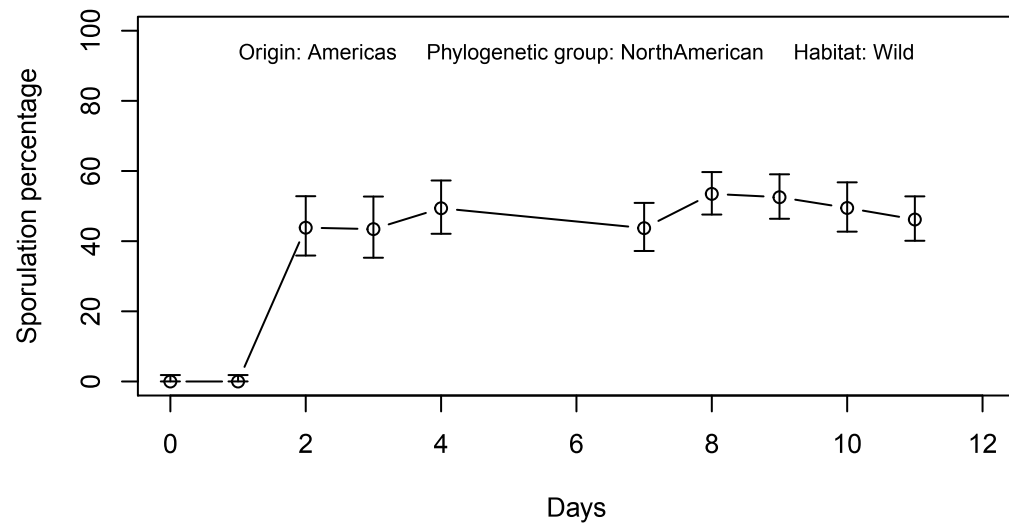

**Strain YPS128**

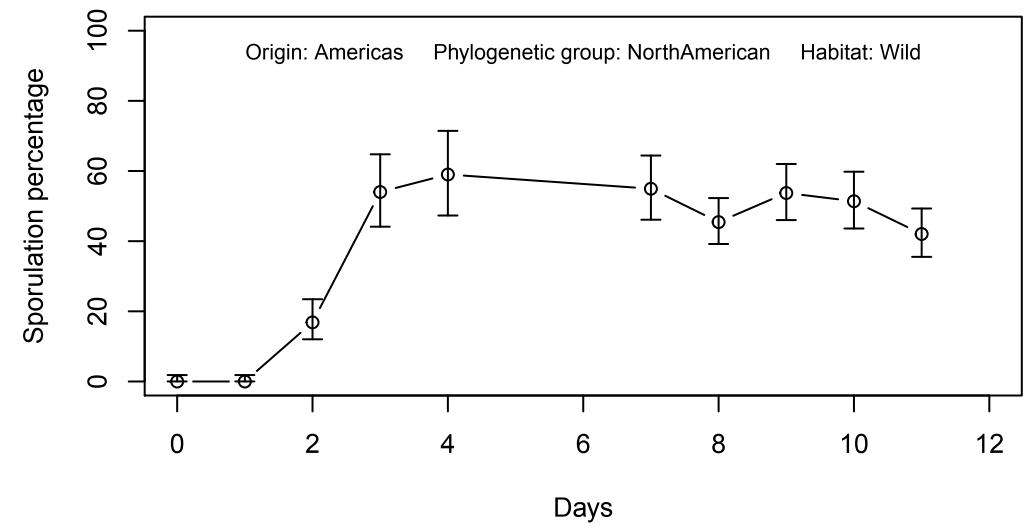

Supplement: Supplementary file 5 [file 2]
