# Supplementary material
Source: publisher figshare collection journal article supplement (https://gsajournals.figshare.com/articles/dataset/_/7166009)

**Figure S9:** Recombination rates of hybrids between SK1 and each strain of the collection, in every interval separately (each page represents an interval). Strains are ordered by increasing recombination rate. Colors refer to the phylogenetic groups of the parental strains.

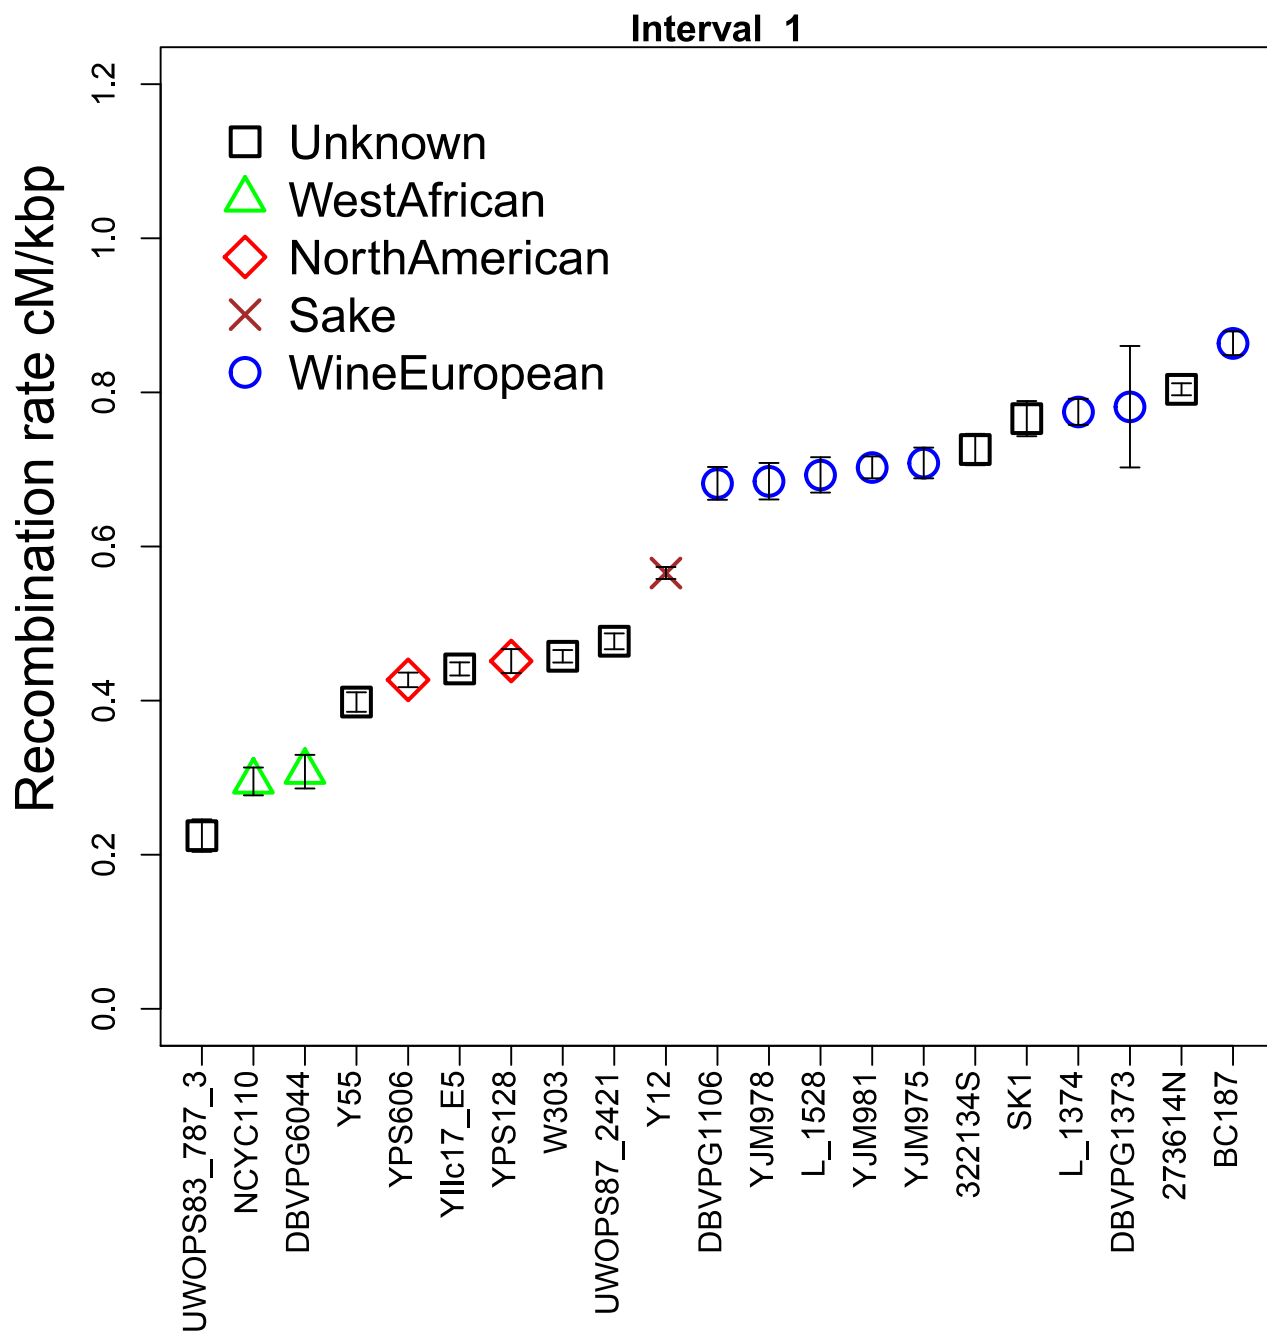

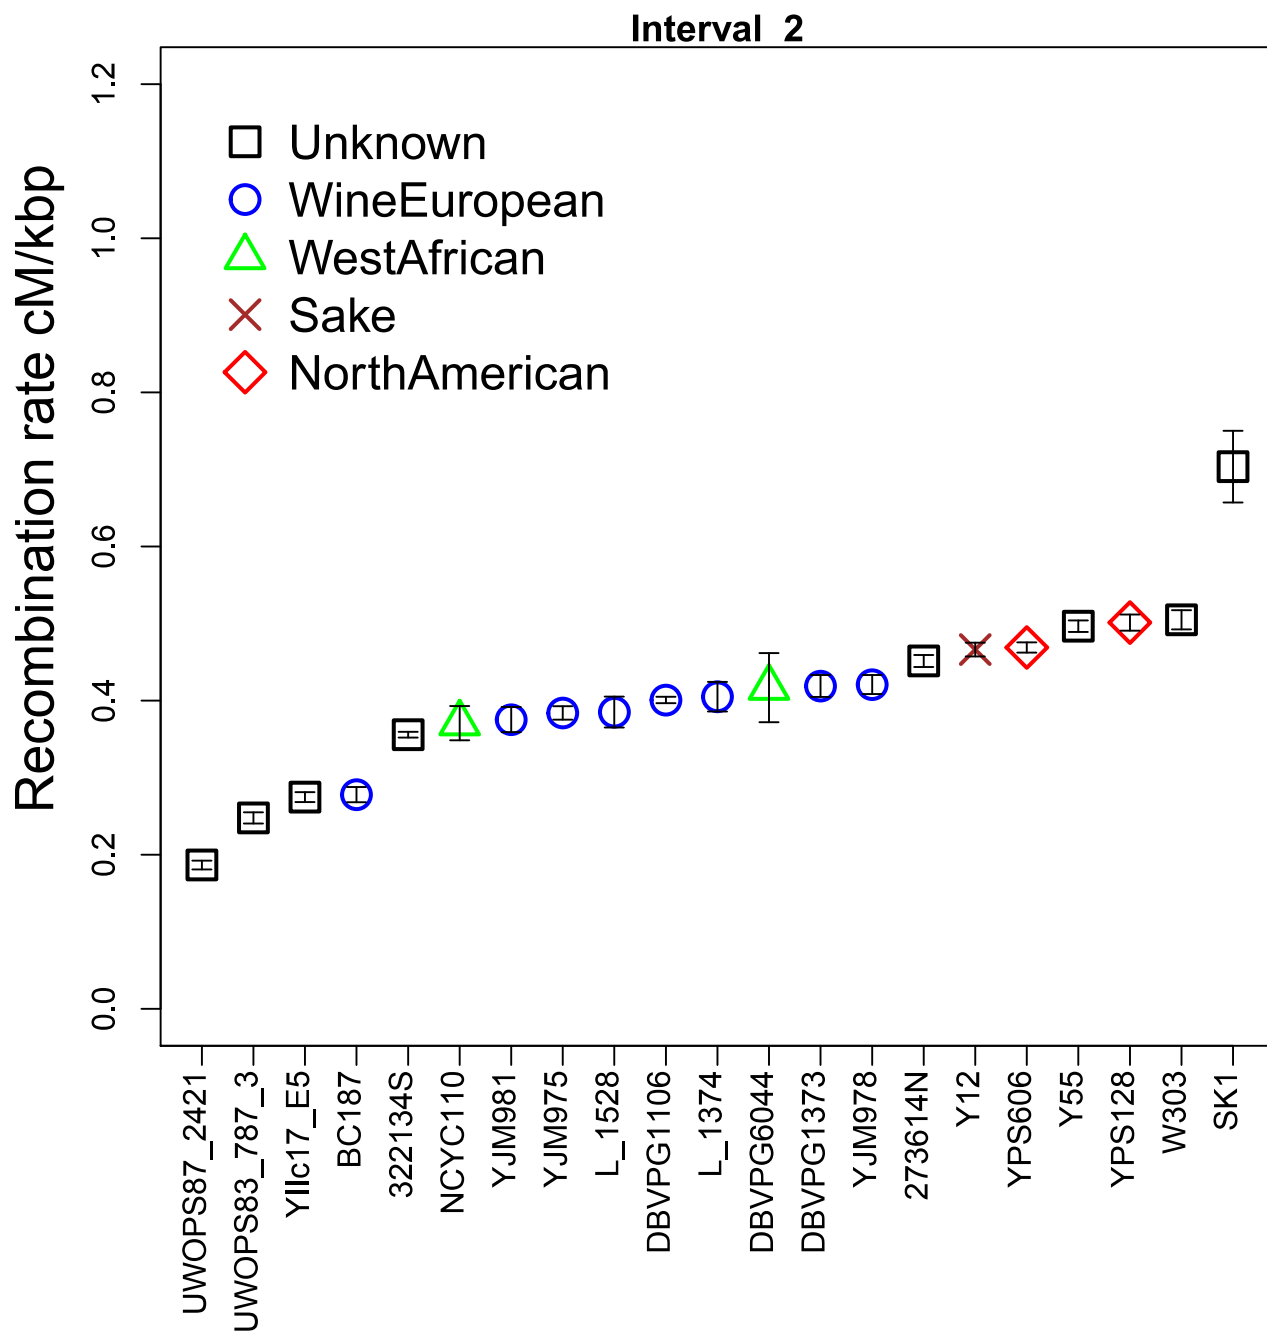

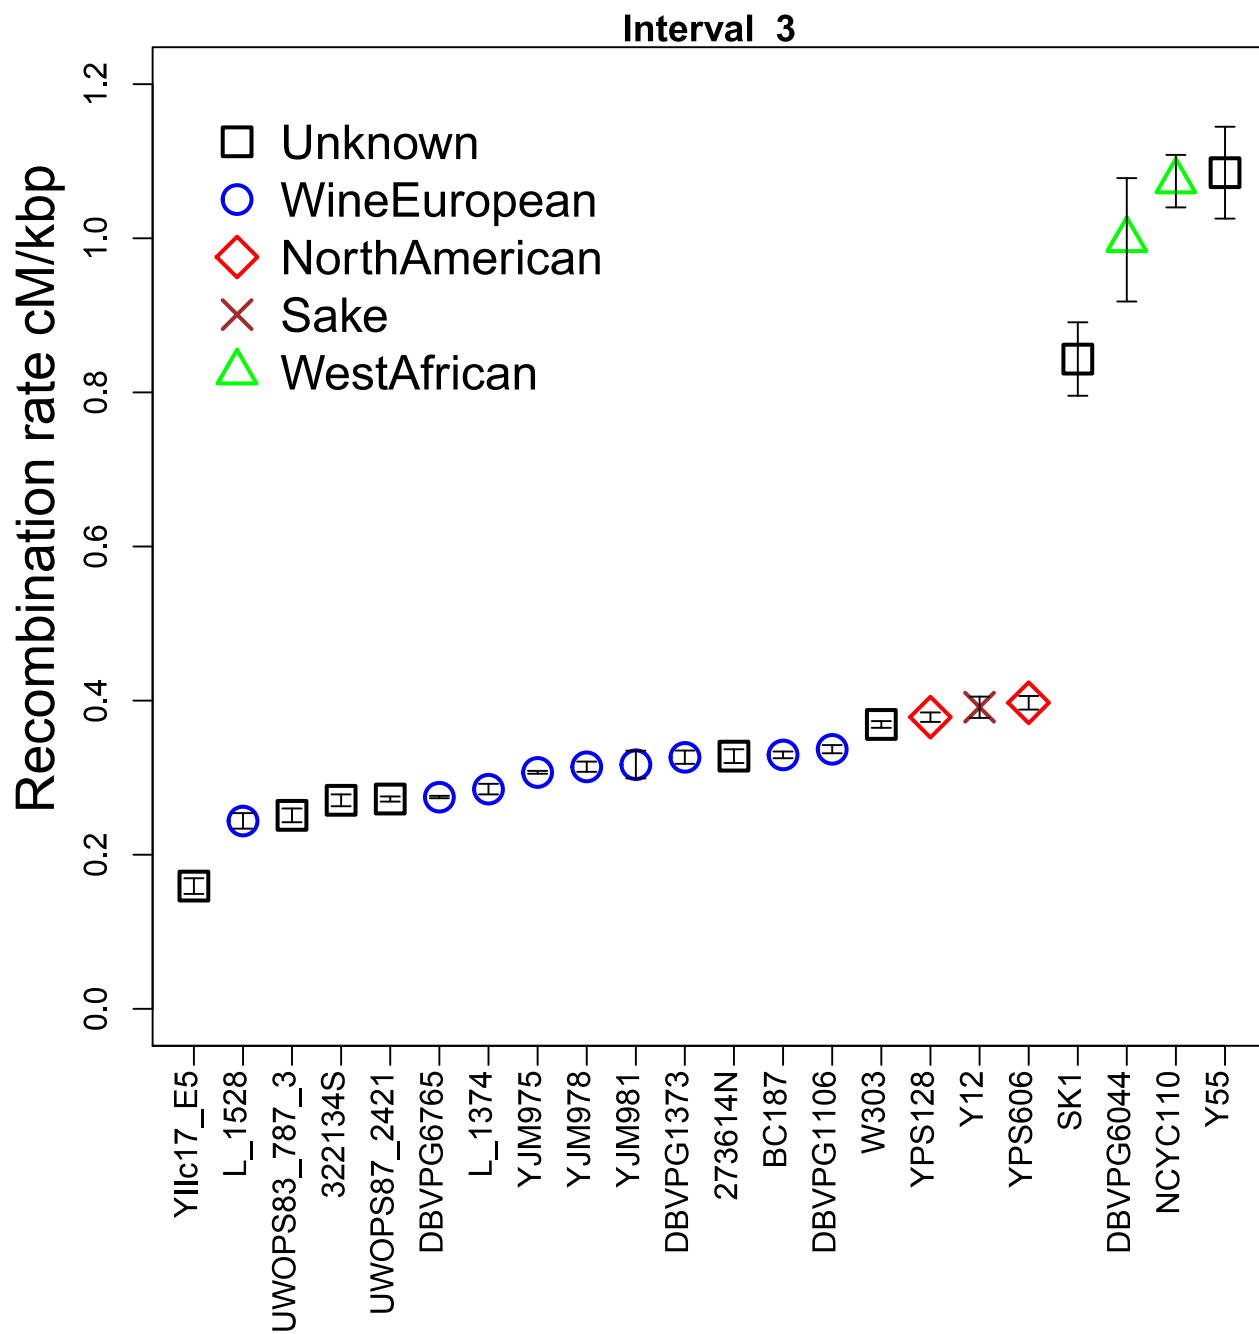

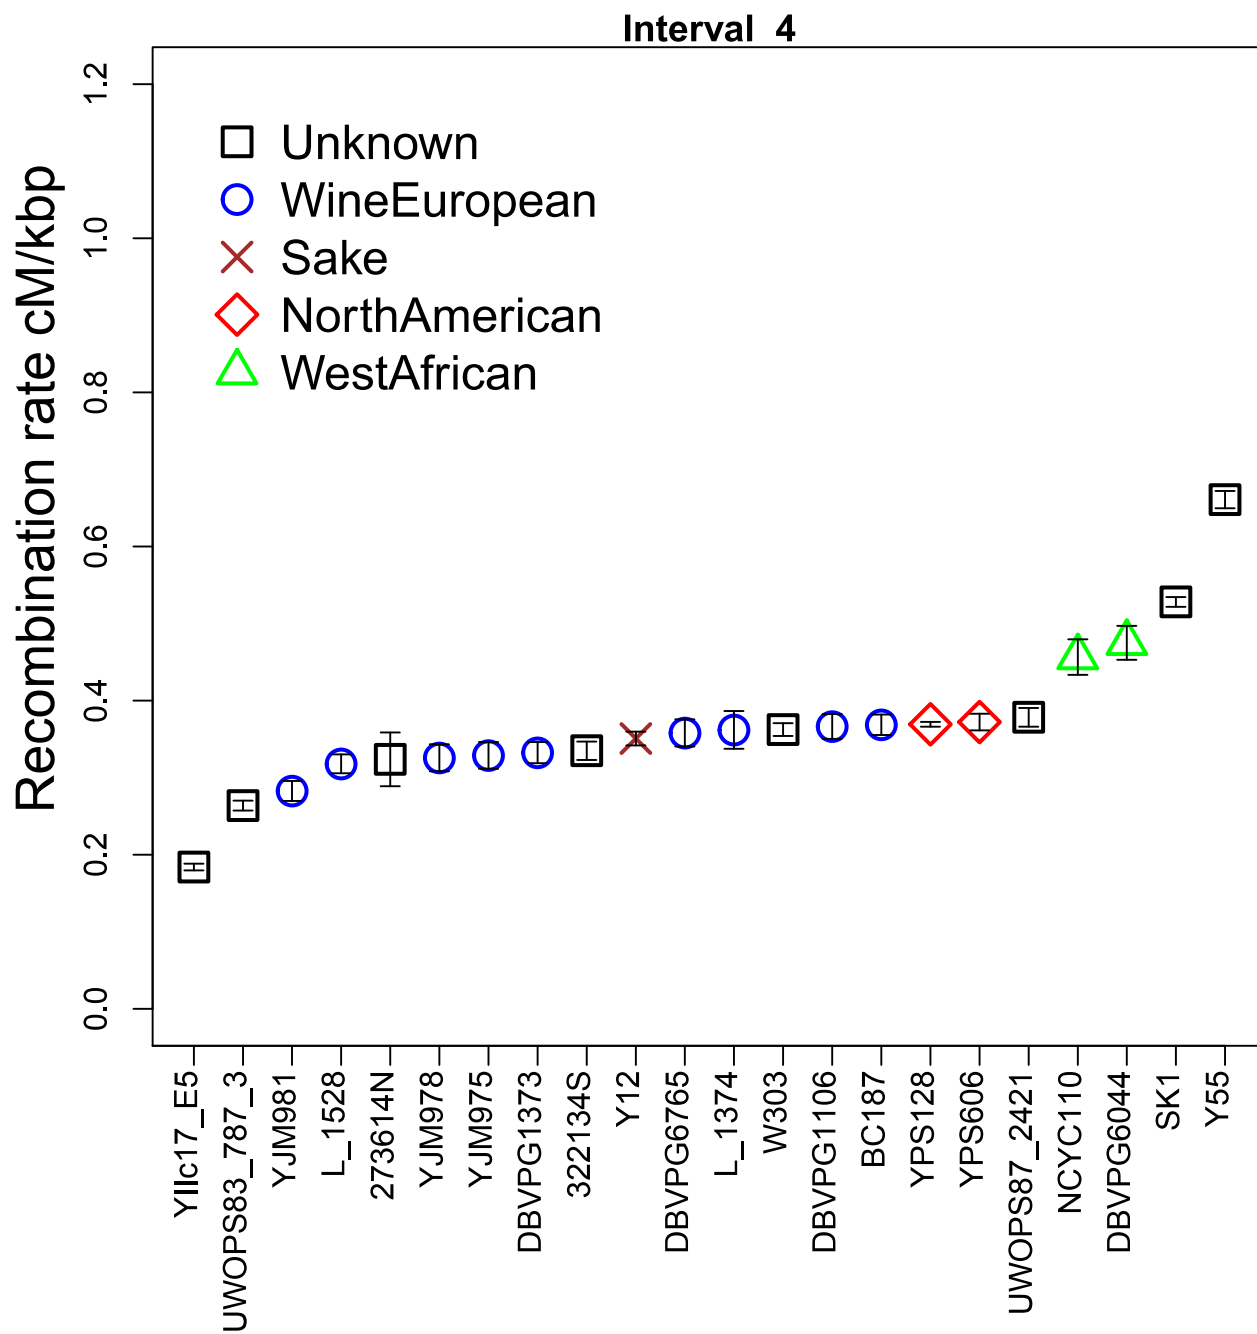

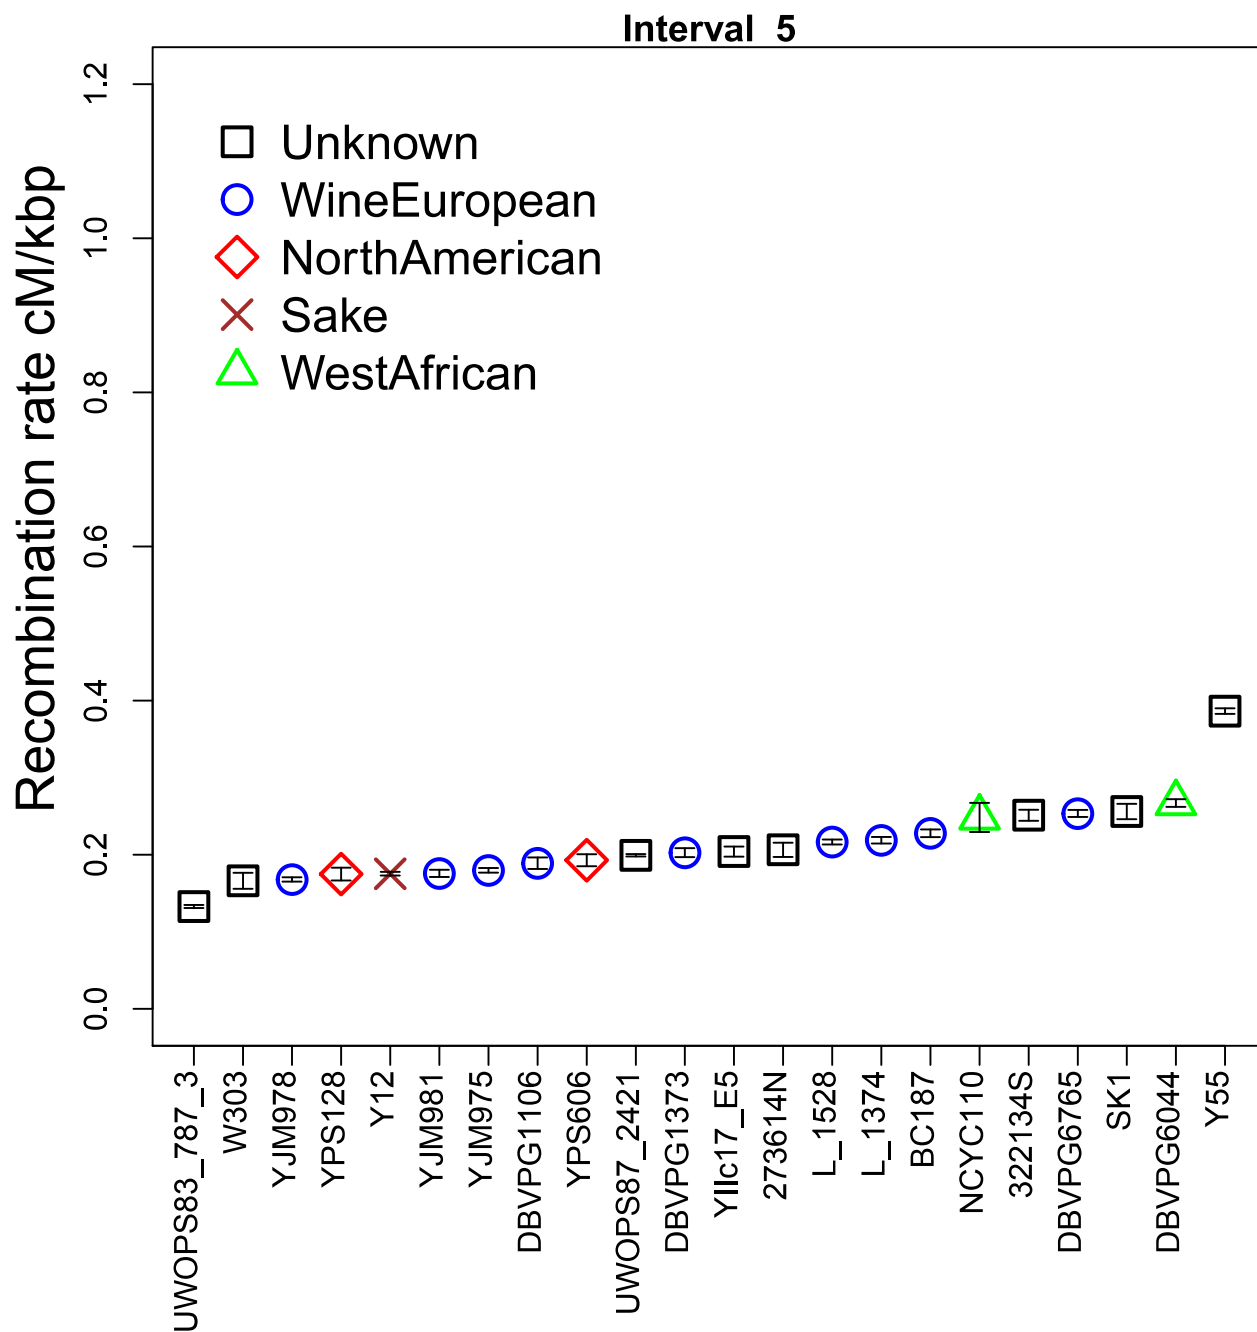

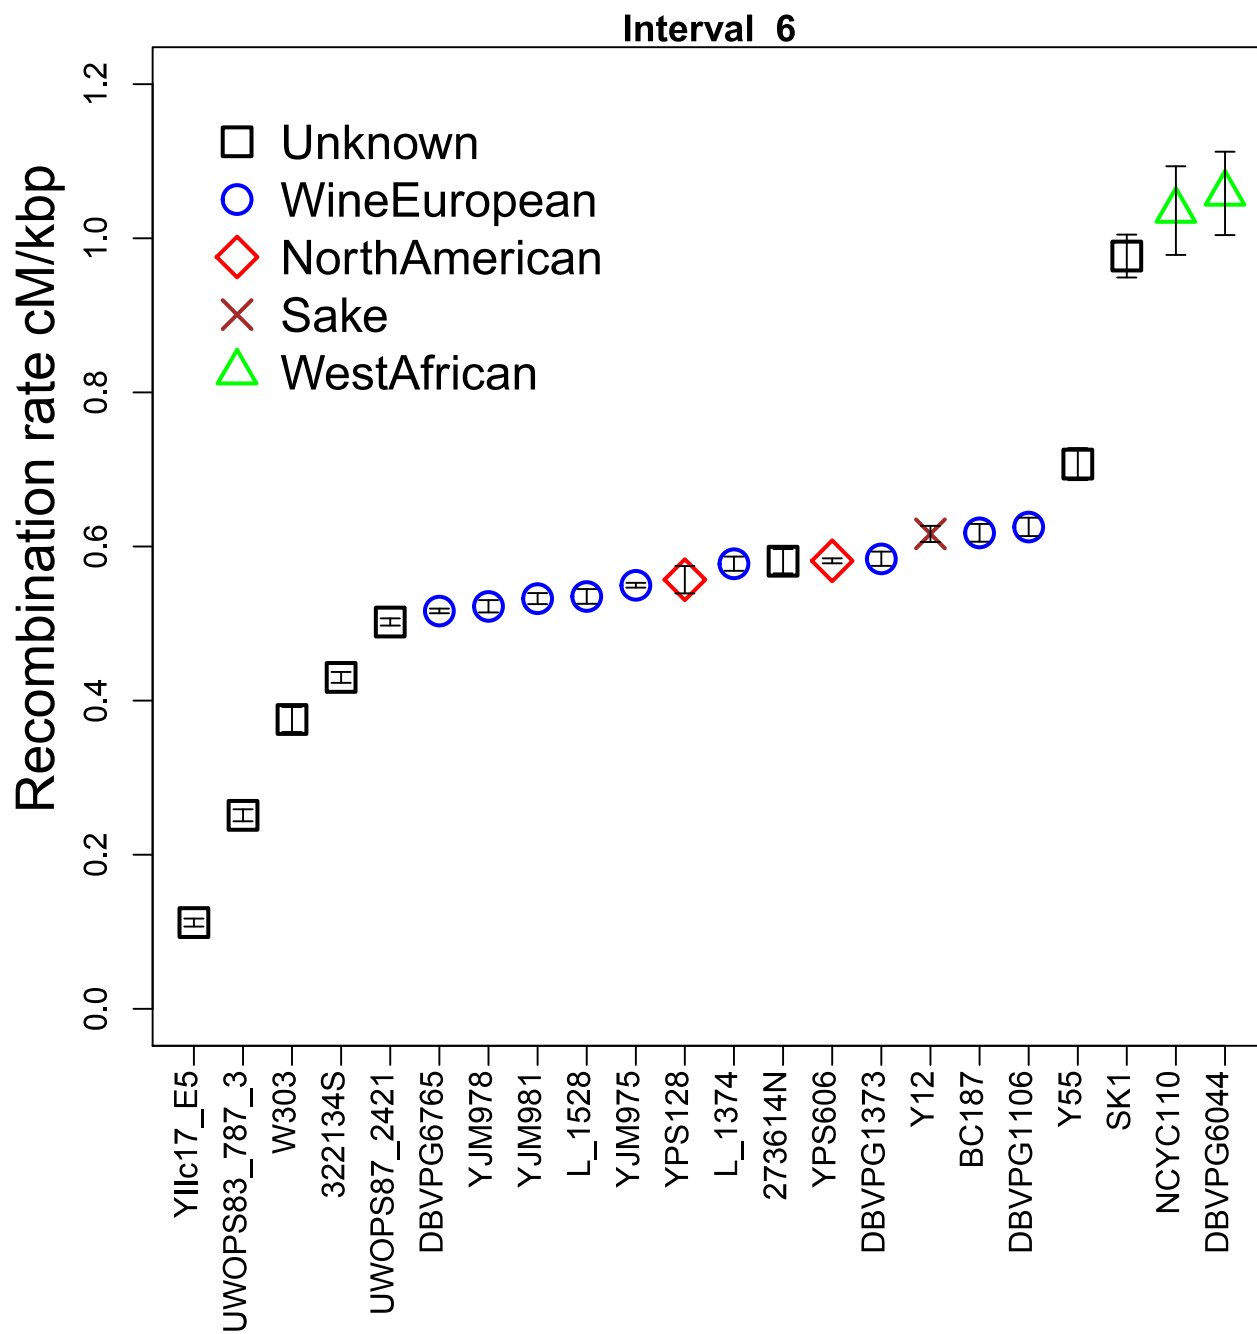

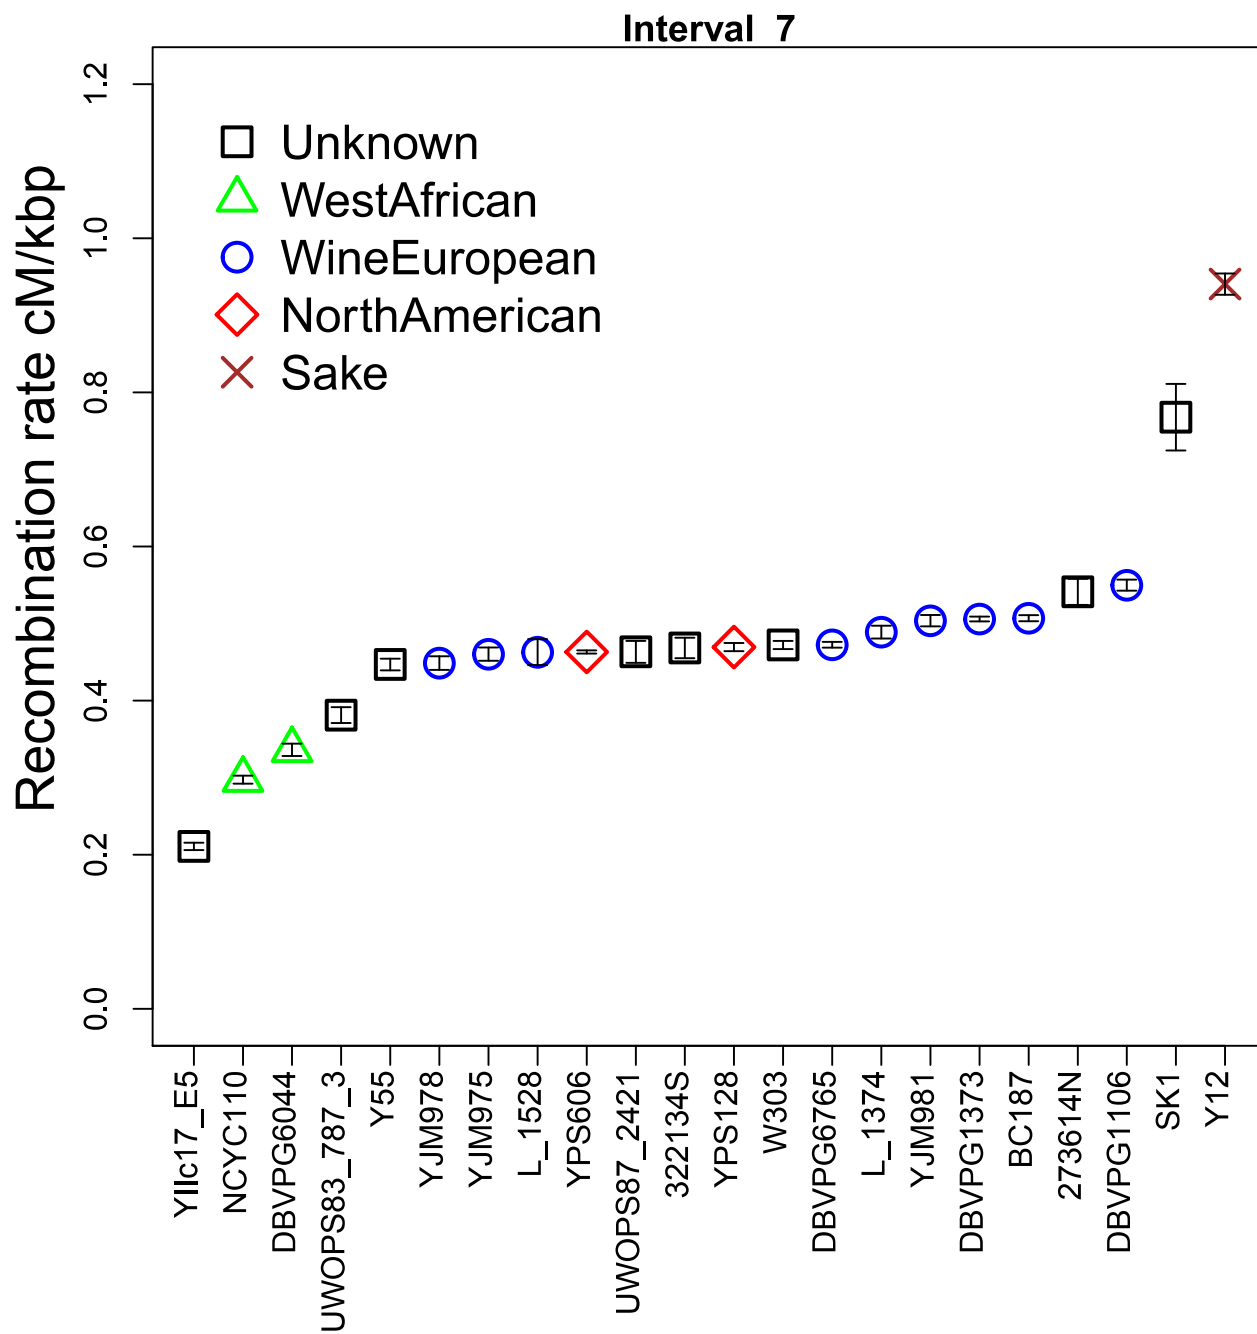



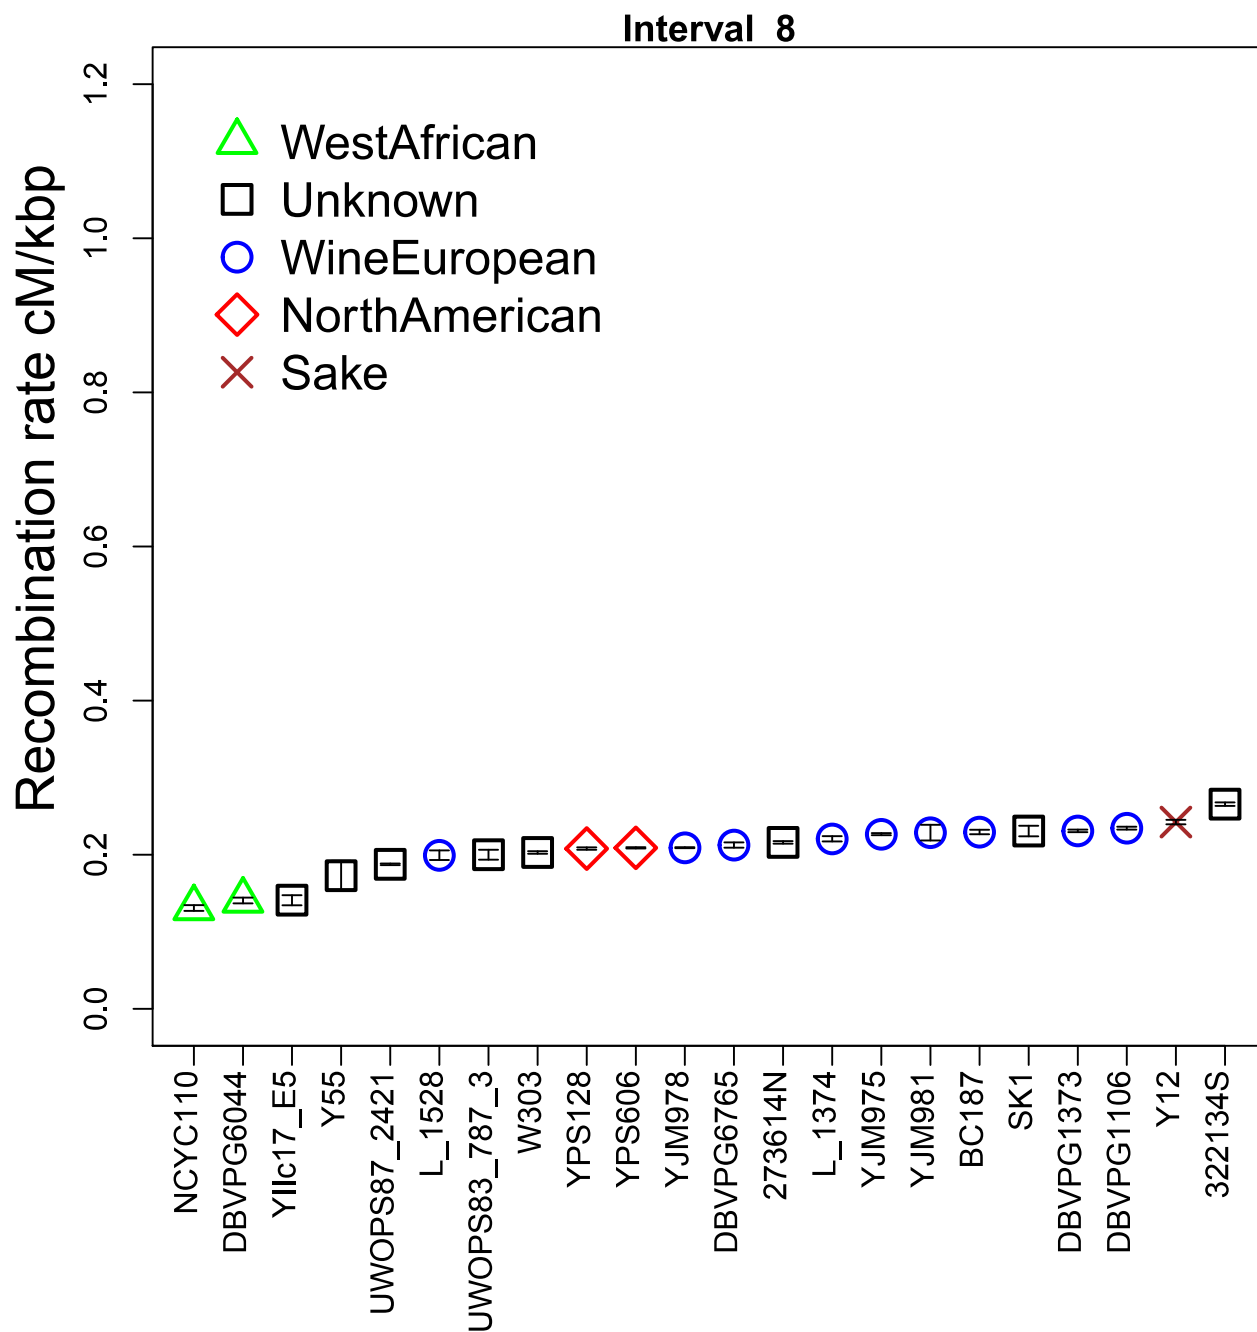

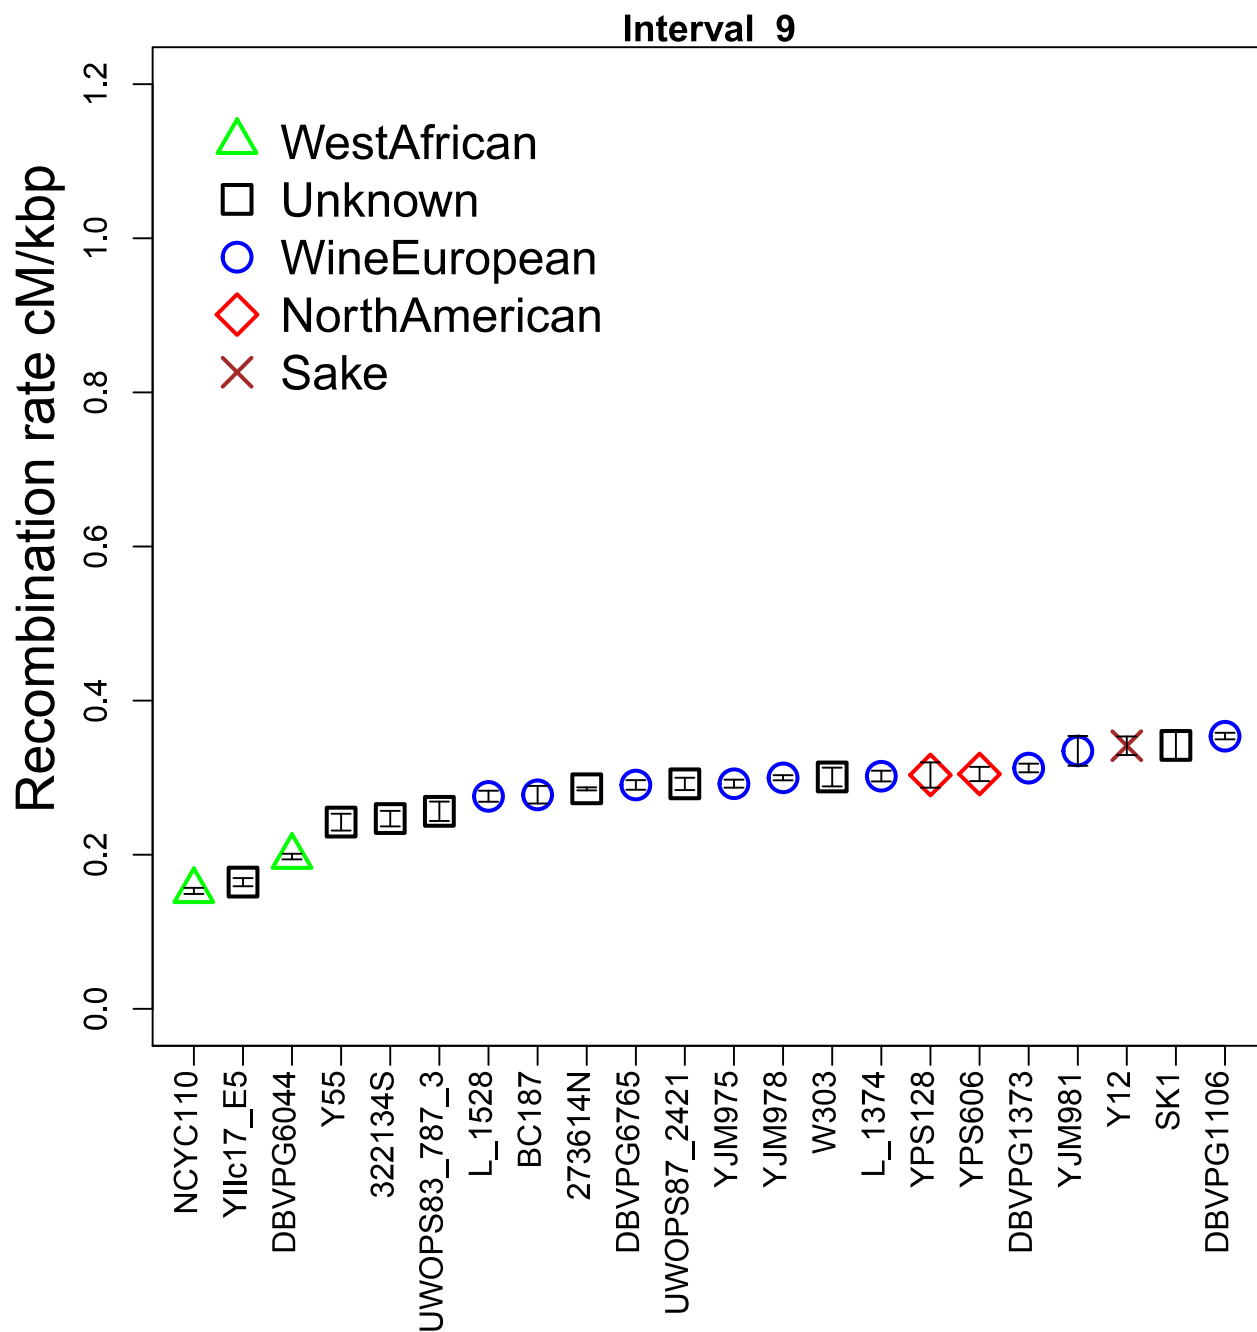

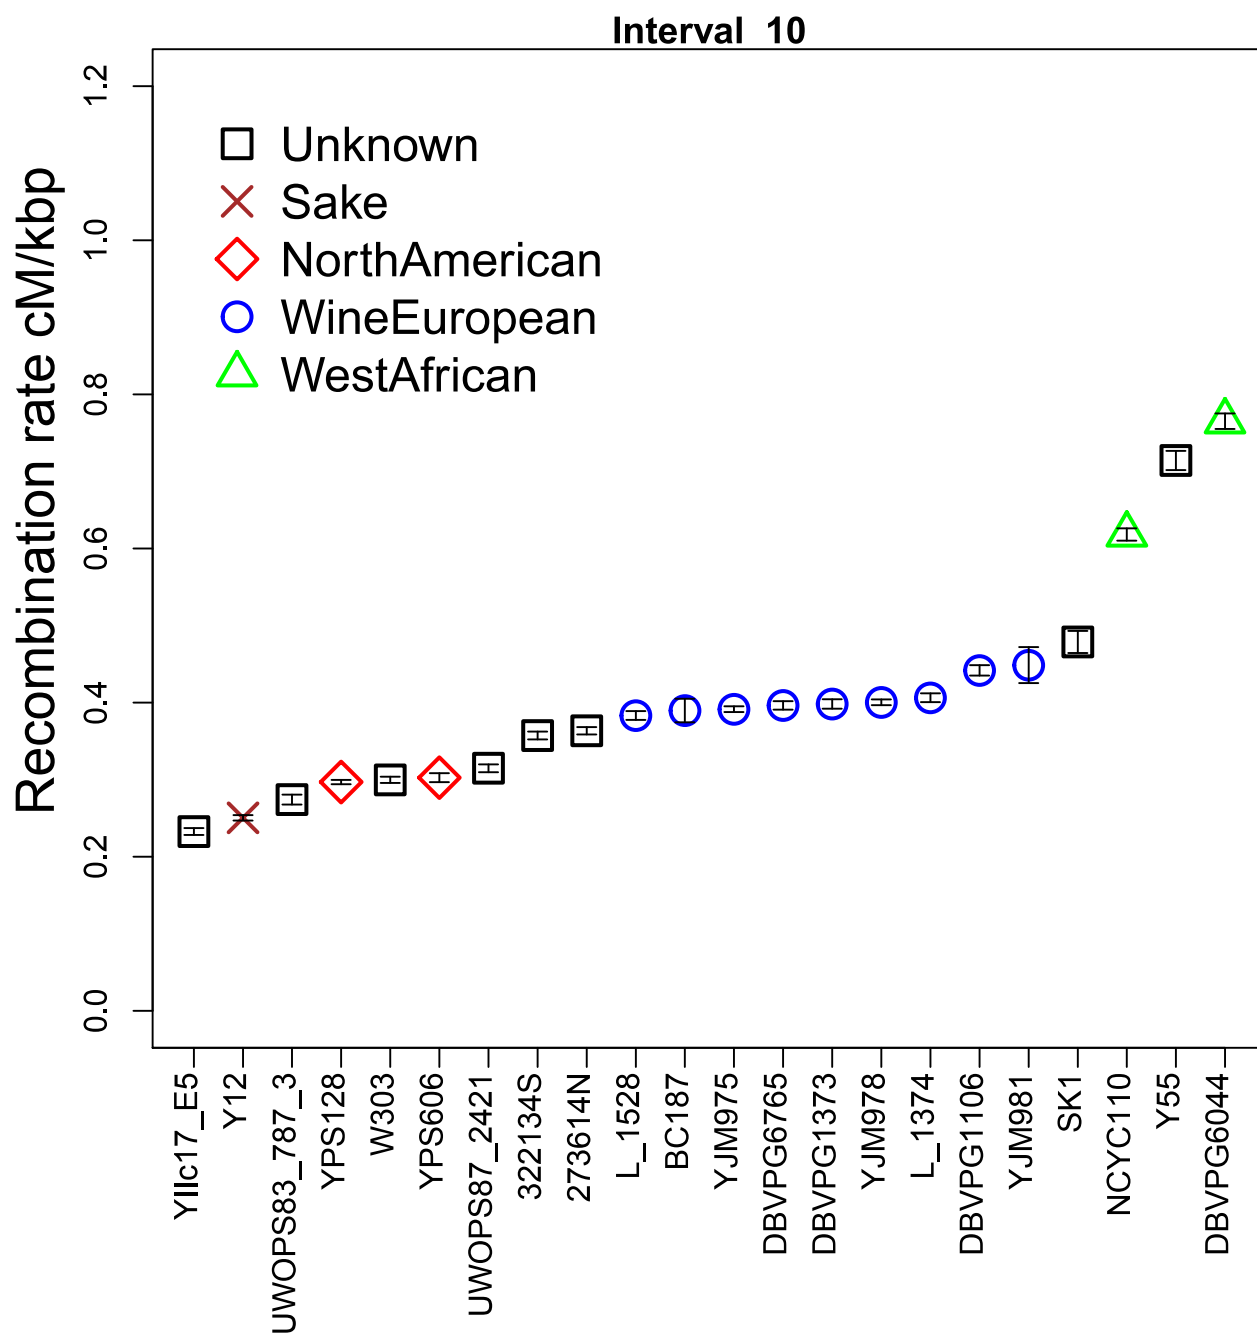

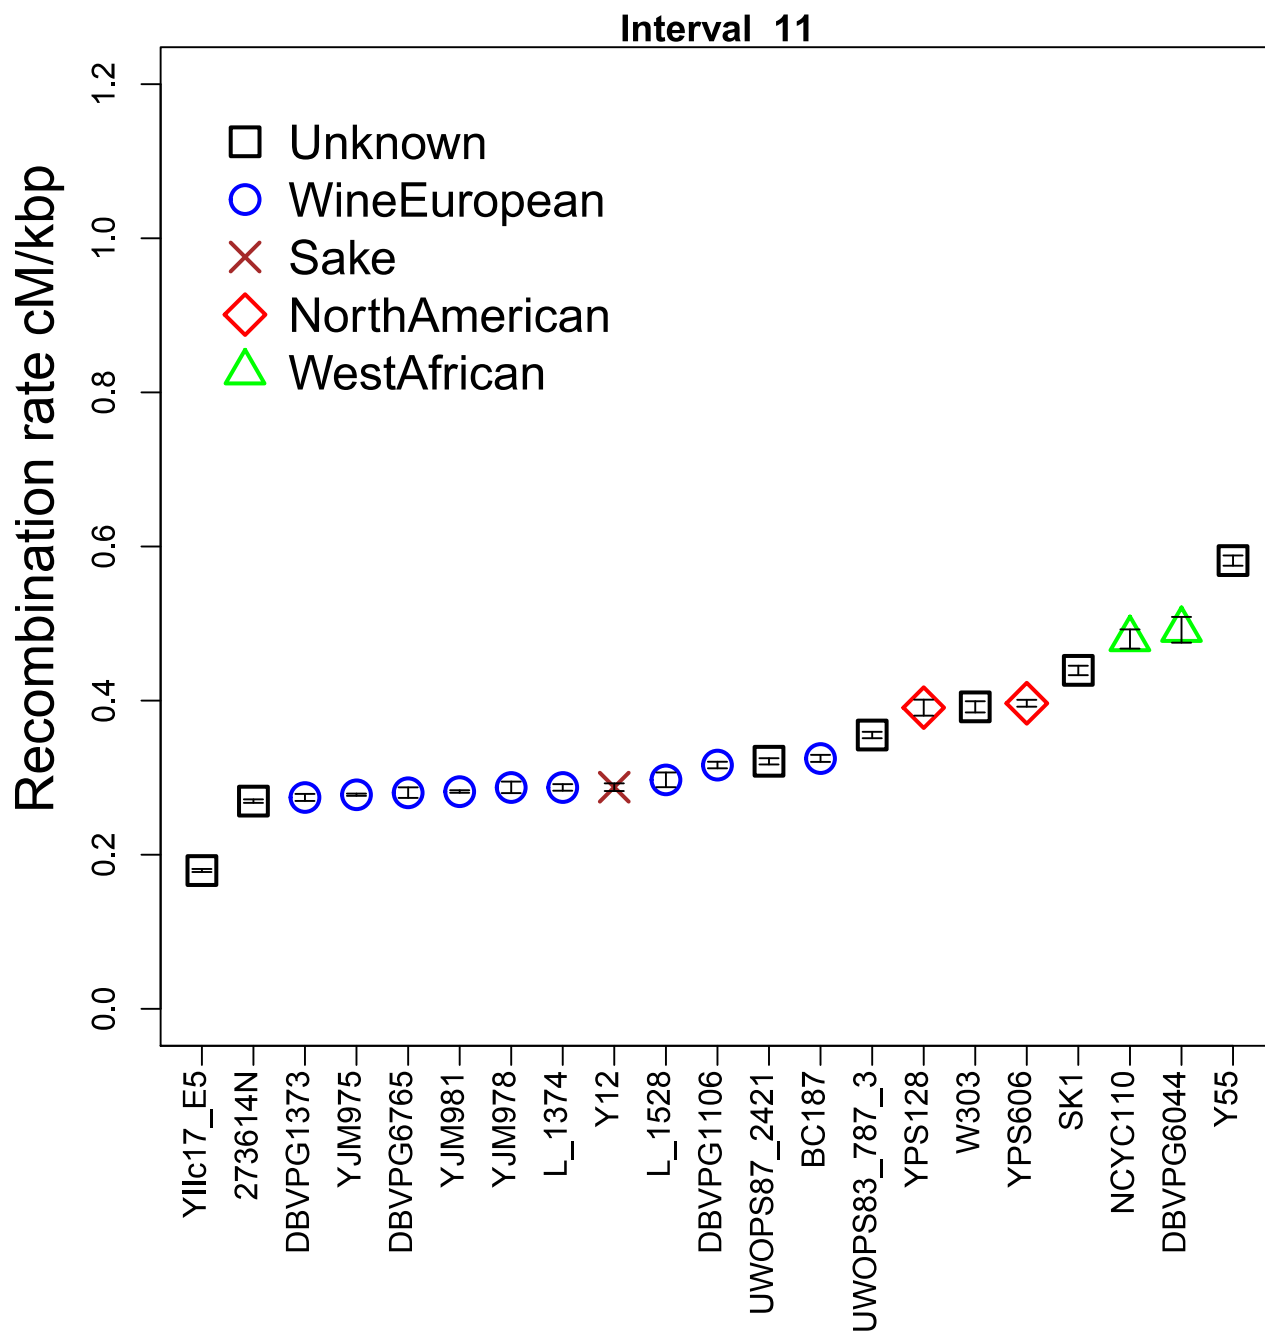

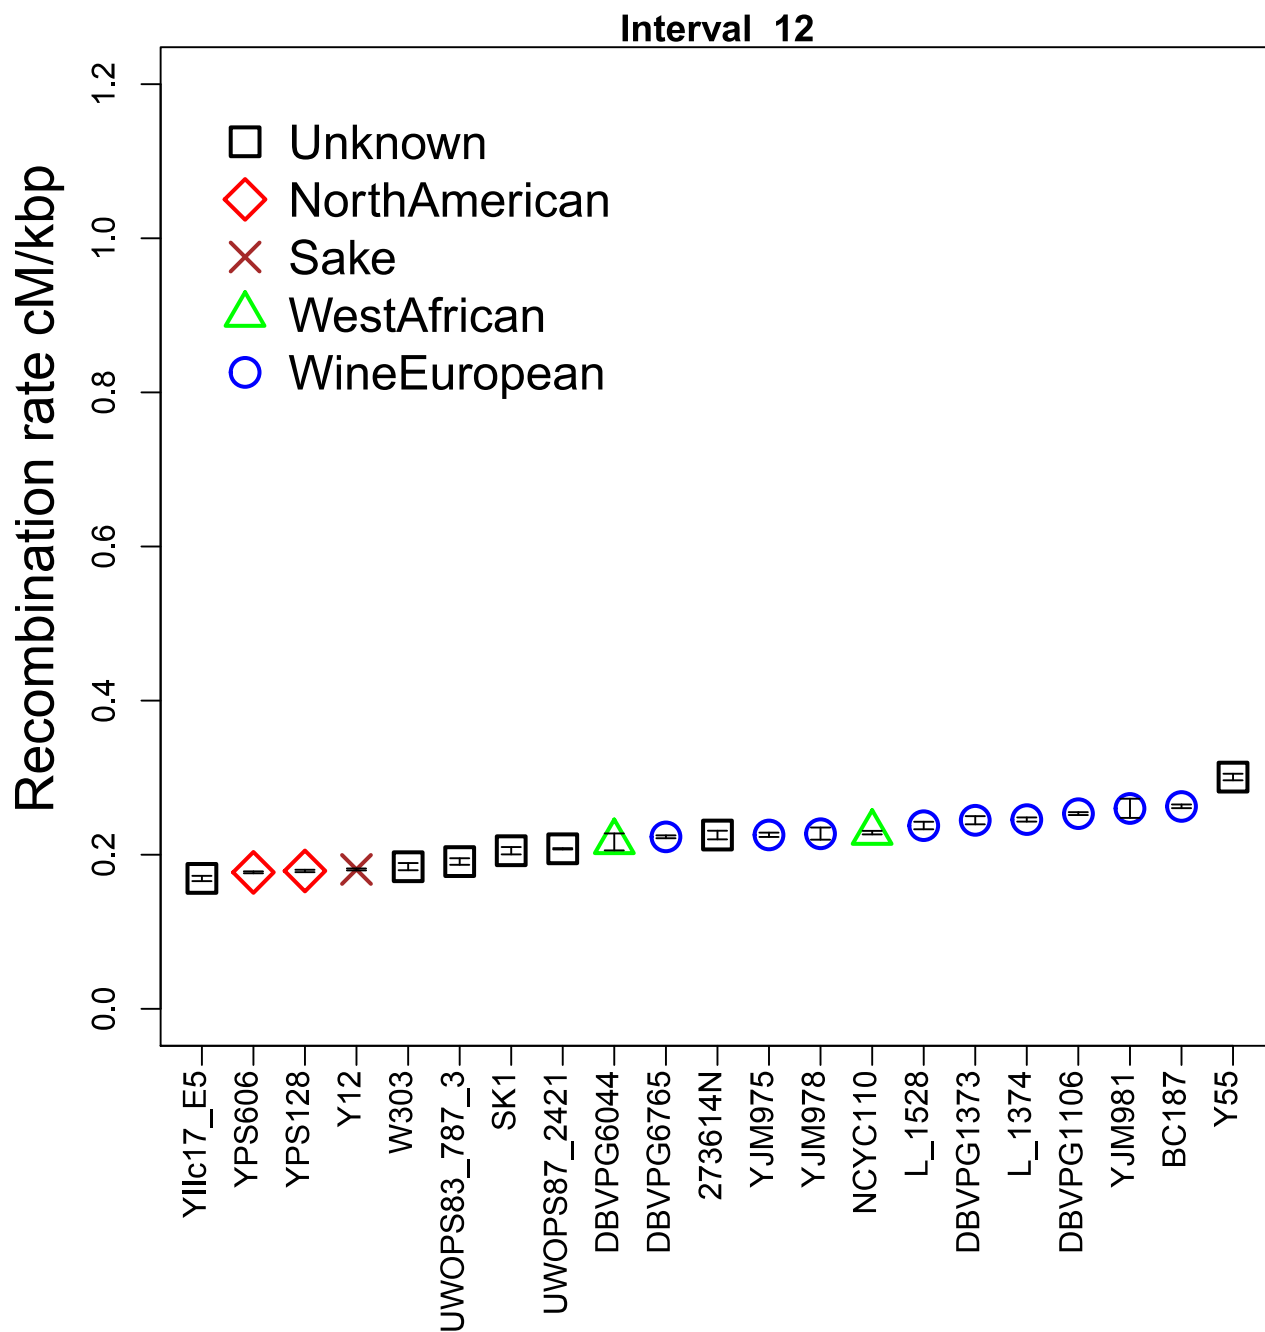

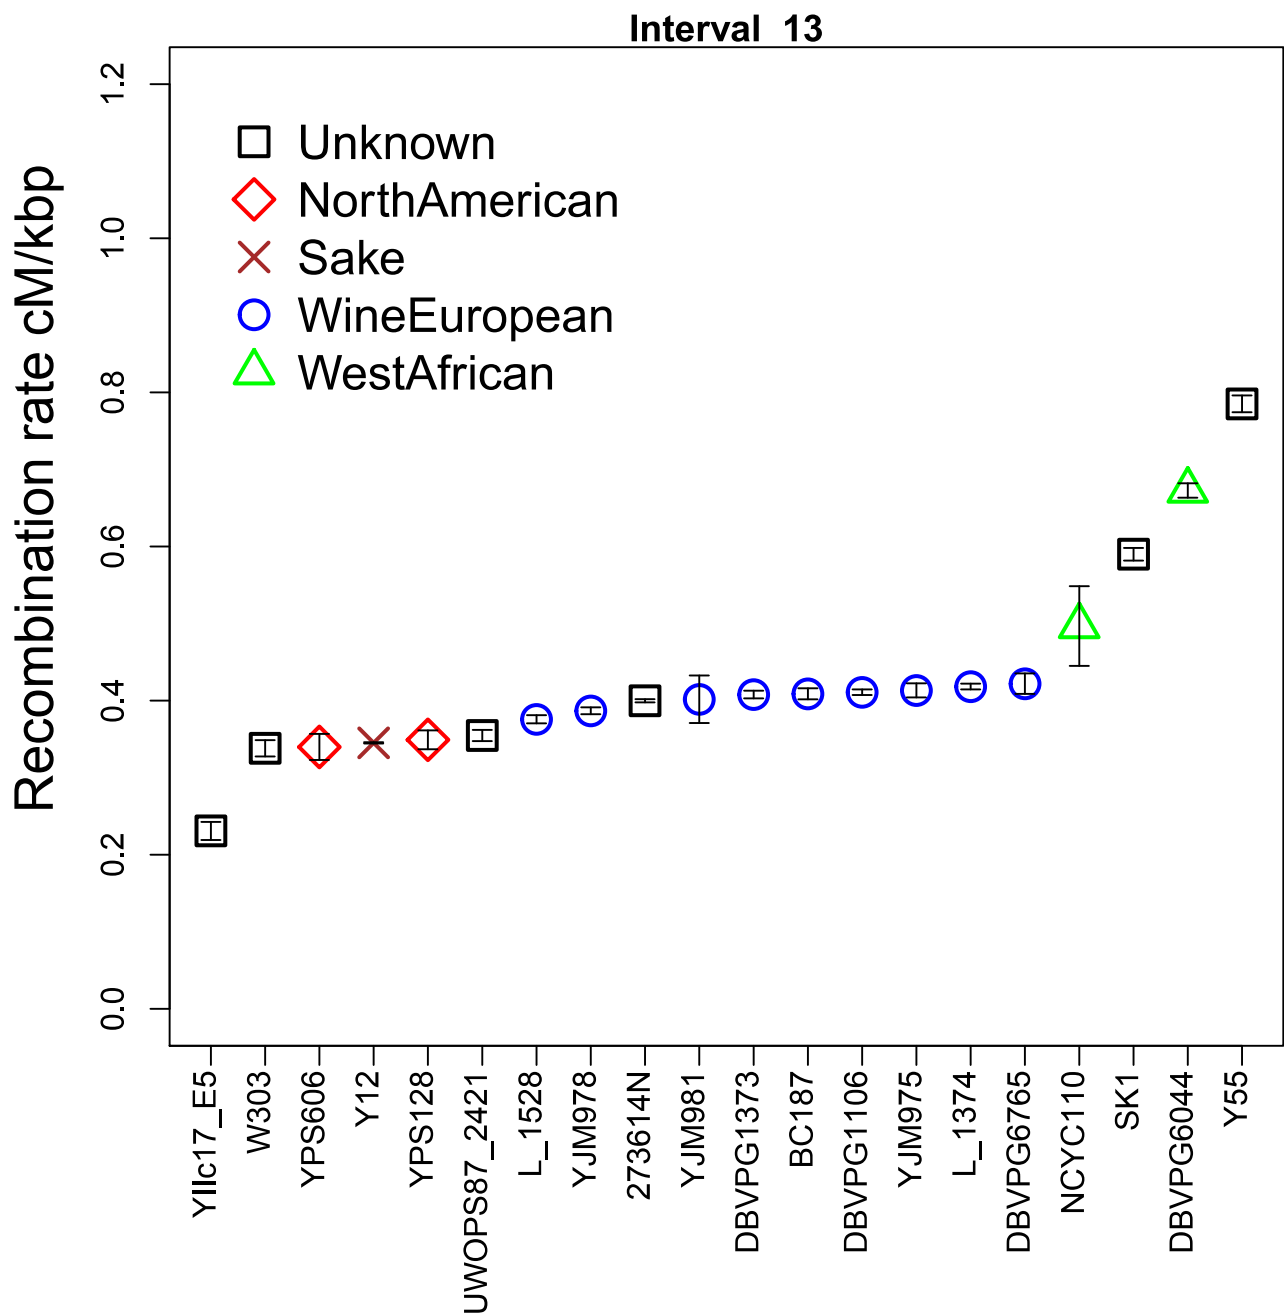

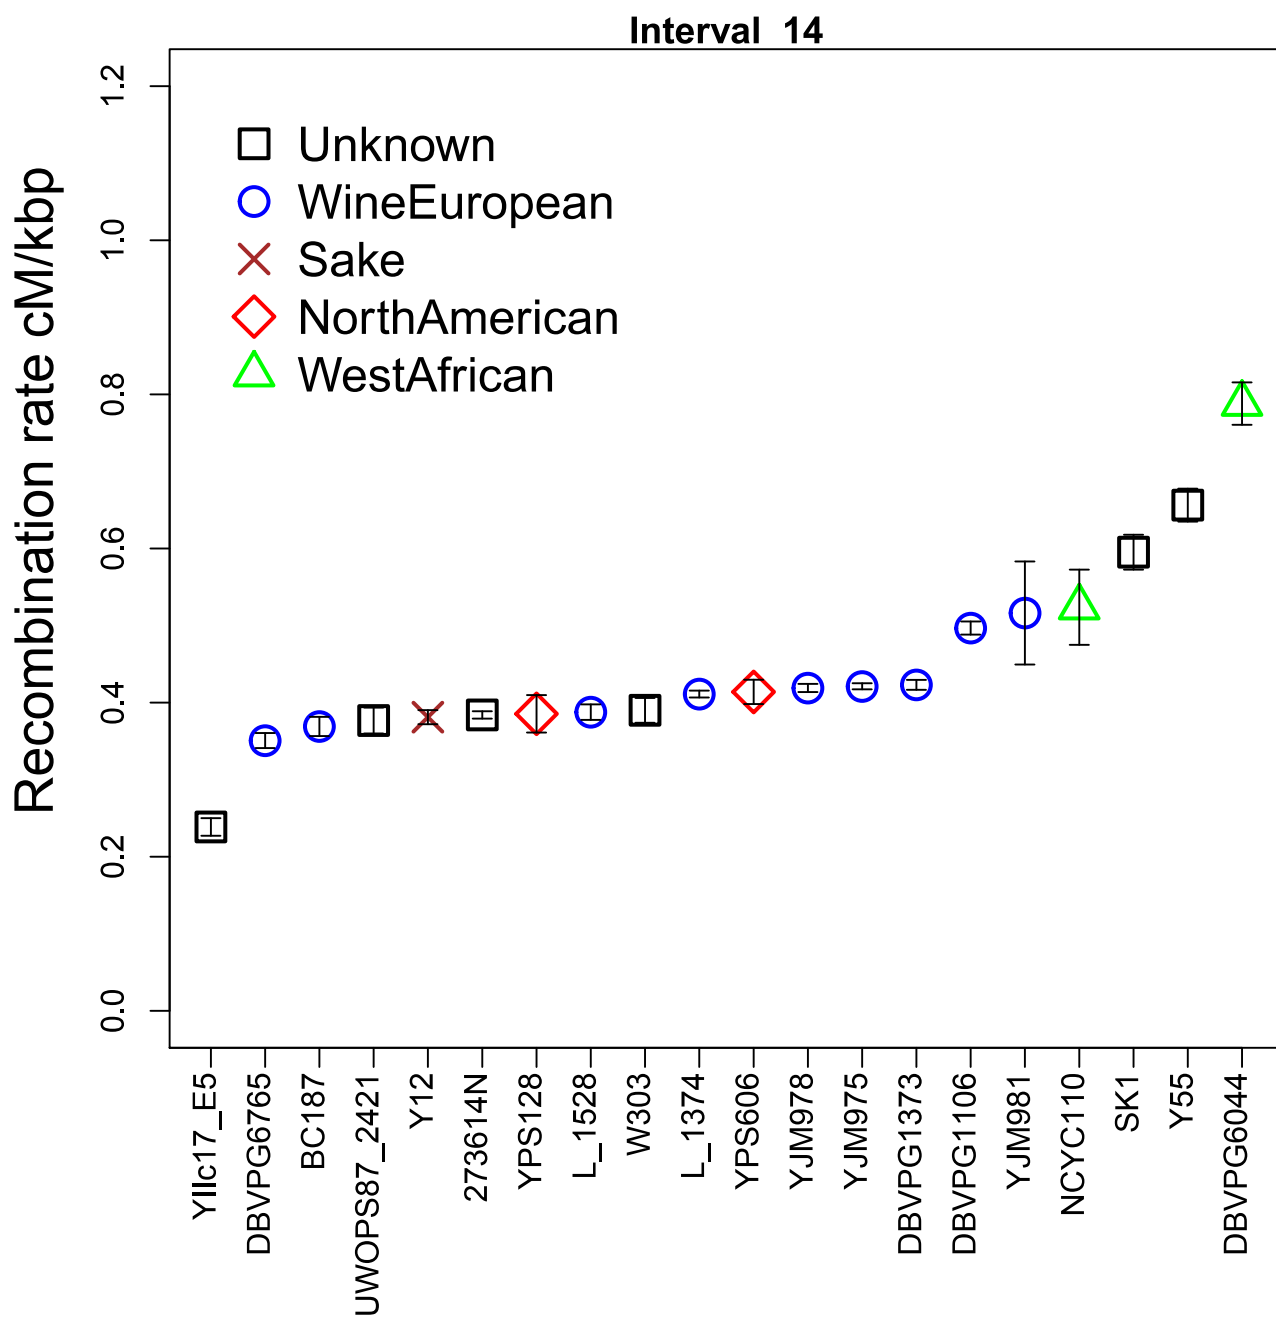

Supplement: Supplementary file 1 [file 2]
