# Supplementary material
Source: publisher figshare collection journal article supplement (https://gsajournals.figshare.com/articles/dataset/_/7166009)
Supplement: Supplementary file 4 [file 2]

**Figure S7:** Recombination rates in cM/kbp along chromosomes for hybrids between SK1 and each of the 22 strains of the study (one page per strain). Error bars indicate 95% confidence intervals based on four biological replicates. X-axis: physical position along chromosome I (upper panel), VI (middle panel) or XI (lower panel). Also shown: (1) DSBs per interval: average frequency of double strand breaks per base (Pan *et al.* 2011) between markers, (2) DSB level: average number of DSBs per 5kb window smoothed using “loess” , (3) H3K4Me3 level: arbitrary units based on (Liu *et al.* 2005) and smoothed using “loess”, (4) Rec 8 level: arbitrary units based on (Sun *et al.* 2015) and smoothed using “loess”, and (5) Sequence similarity: proportion of identical bases between homologs (see Materials and Methods) smoothed using “loess”. Vertical blue dashed lines indicate the positions of fluorescent markers. Diamonds at the bottom show centromere positions.

# Hybrid SK1 X W303

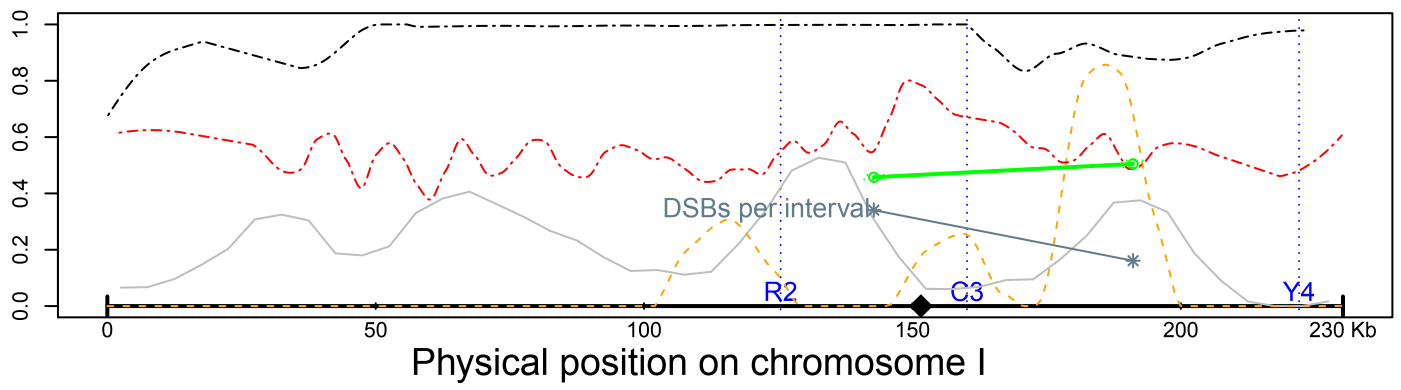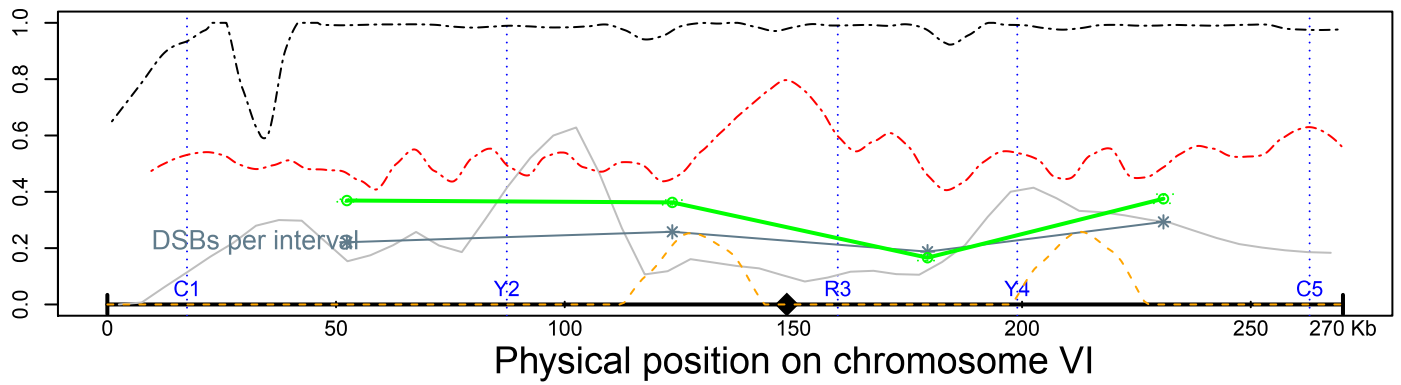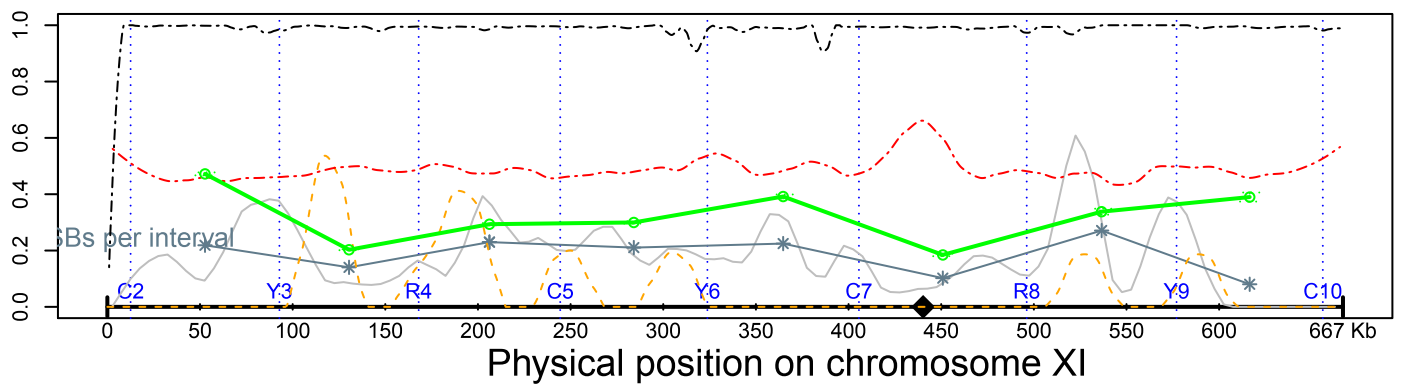

—○— Recombination rate

— DSB level  
 — DSBs per interval  
 - - - H3K4me3 level  
 - - - Sequence similarity  
 - - - Rec8 level

# Hybrid SK1 X YS9

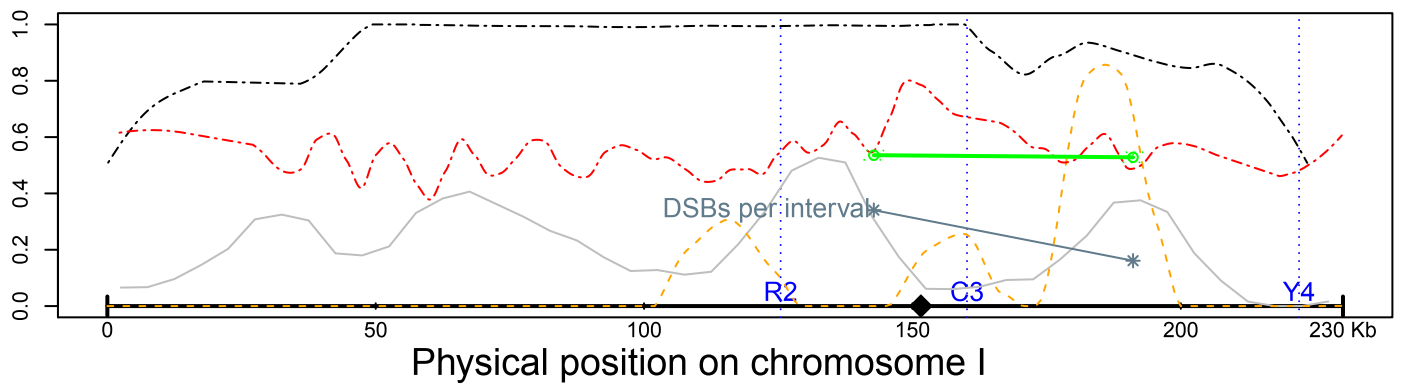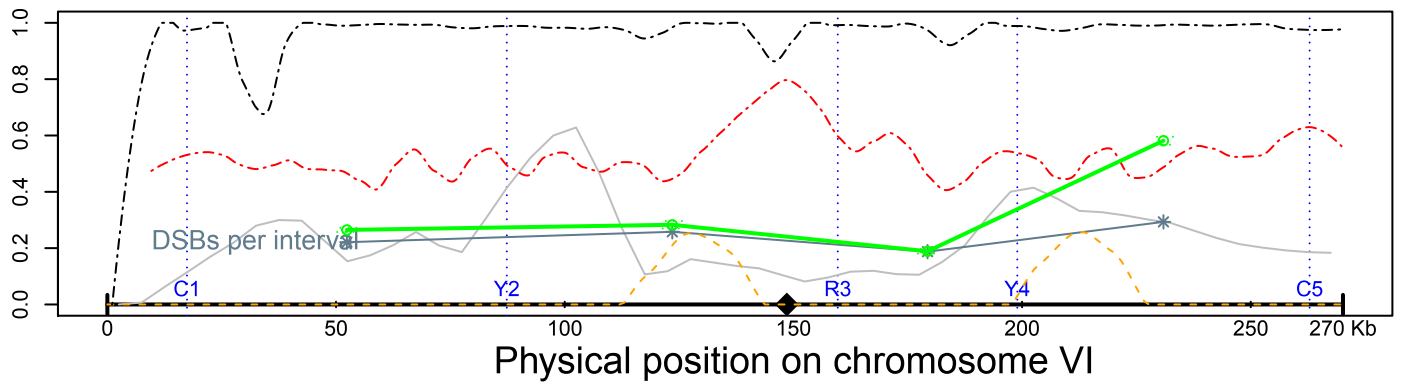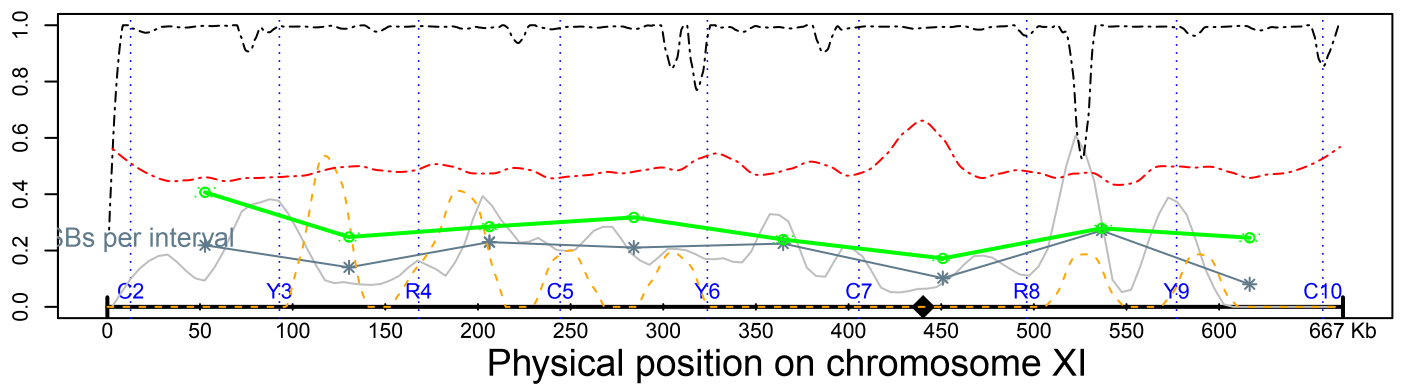

—○— Recombination rate

— DSB level  
 — DSBs per interval  
 - - - H3K4me3 level  
 - - - Sequence similarity  
 - - - Rec8 level

# Hybrid SK1 X 273614N

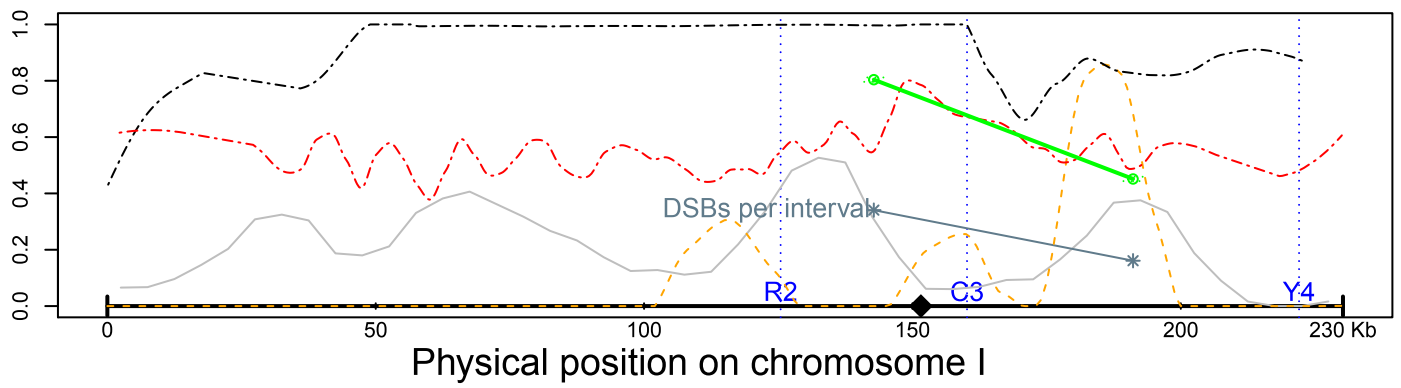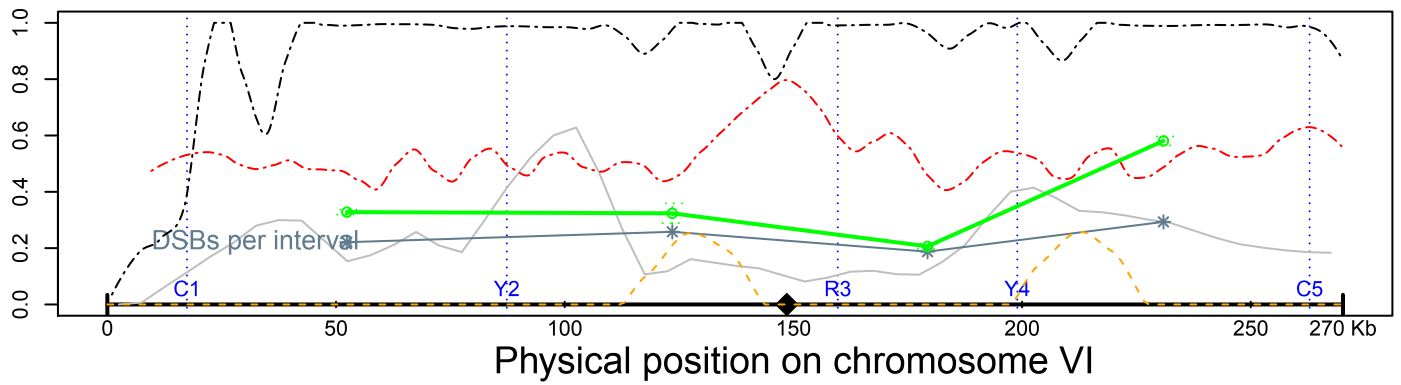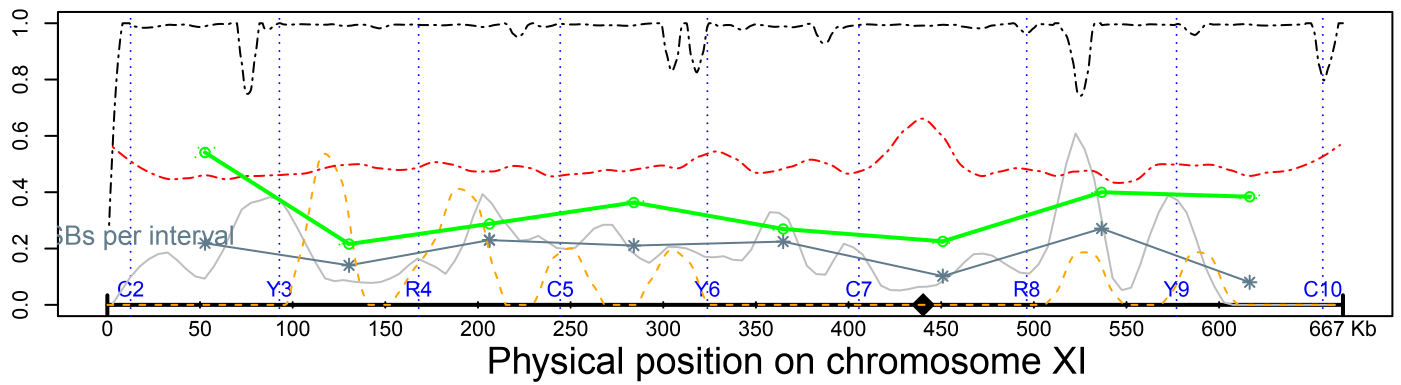

—○— Recombination rate

— DSB level  
 — DSBs per interval  
 - - - H3K4me3 level  
 - - - Sequence similarity  
 - - - Rec8 level

# Hybrid SK1 X Yllc17\_E5

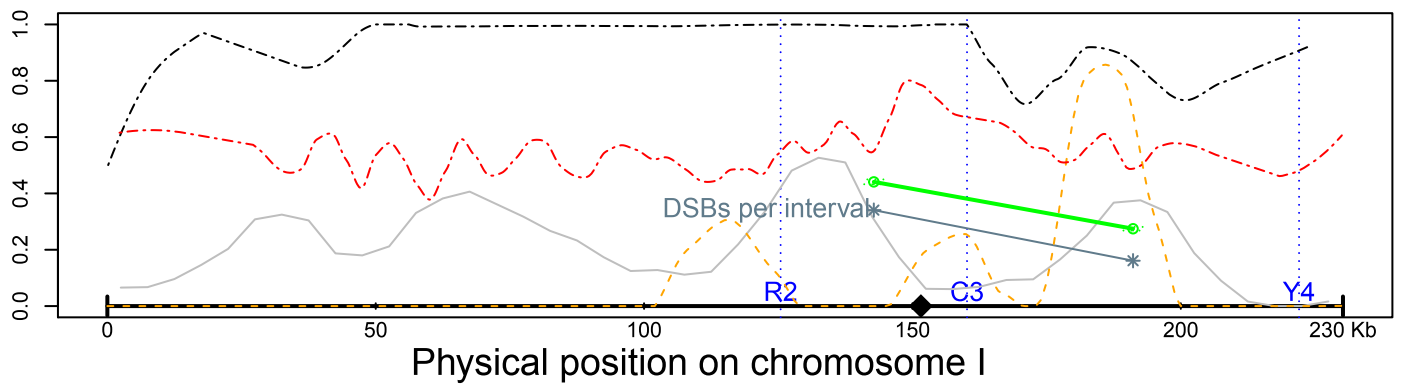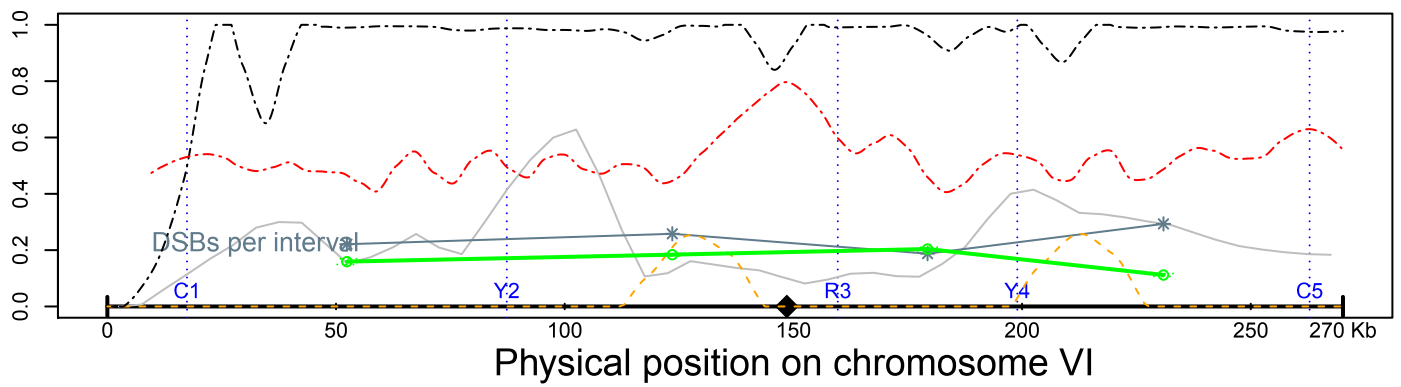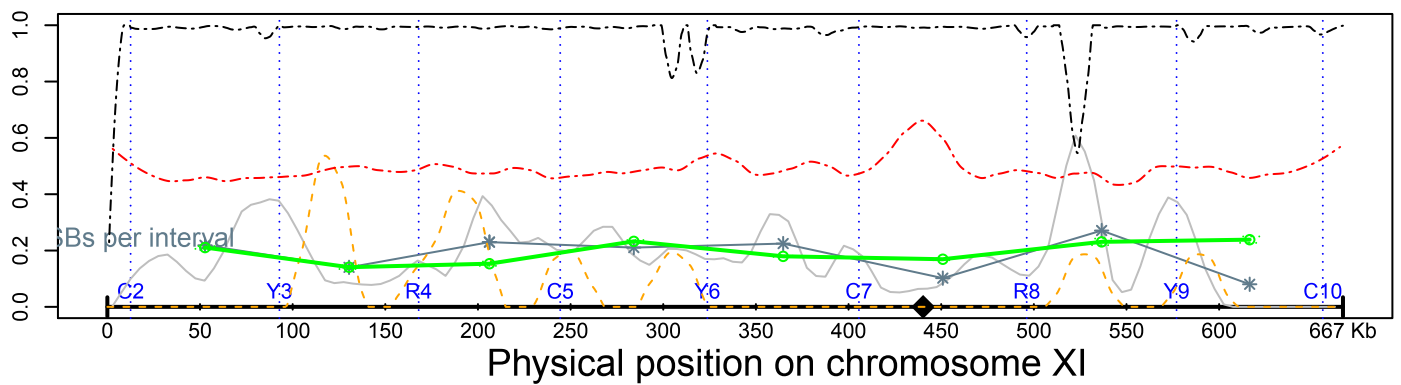

—○— Recombination rate

— DSB level  
— DSBs per interval  
- - - H3K4me3 level  
- - - Sequence similarity  
- - - Rec8 level

# Hybrid SK1 X 322134S

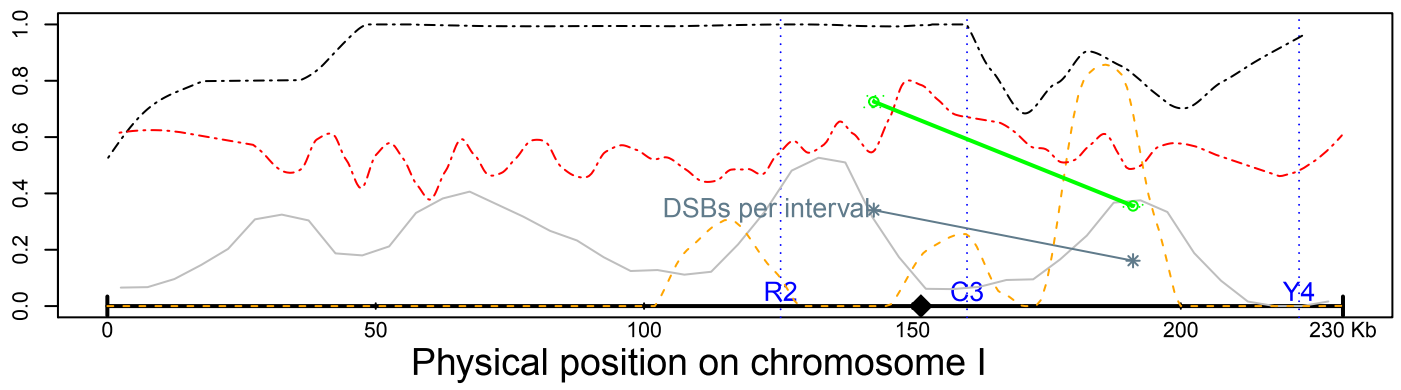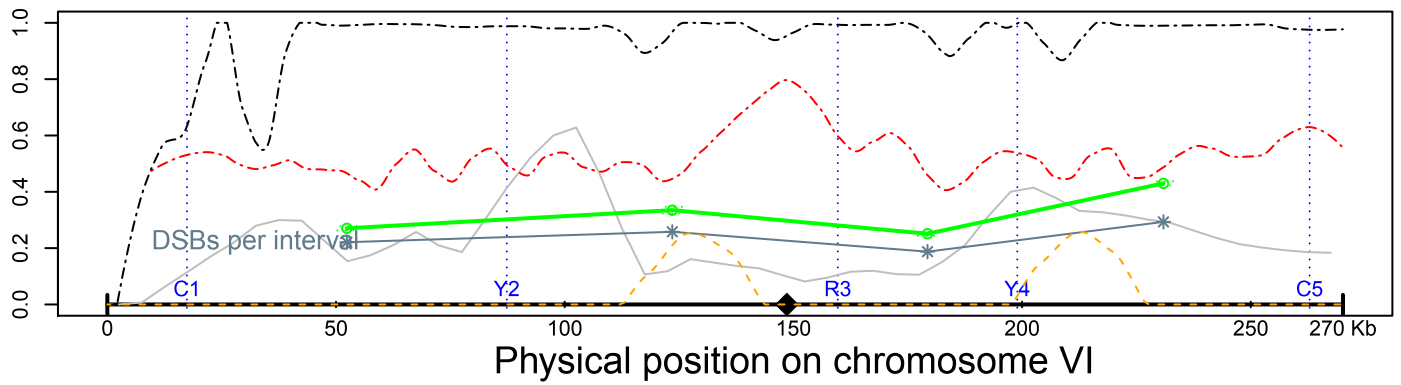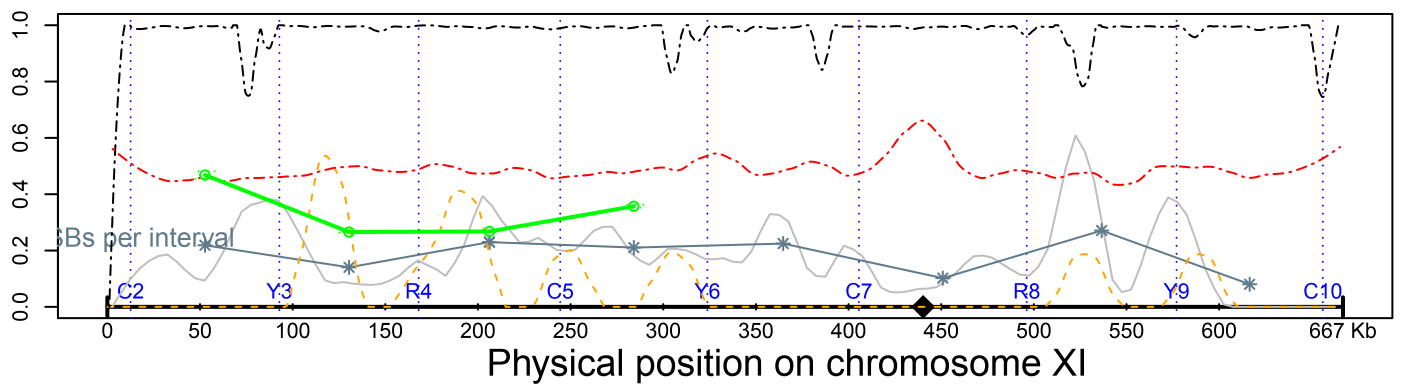

—○— Recombination rate

— DSB level  
 — DSBs per interval  
 - - - H3K4me3 level  
 - - - Sequence similarity  
 - - - Rec8 level

# Hybrid SK1 X Y55

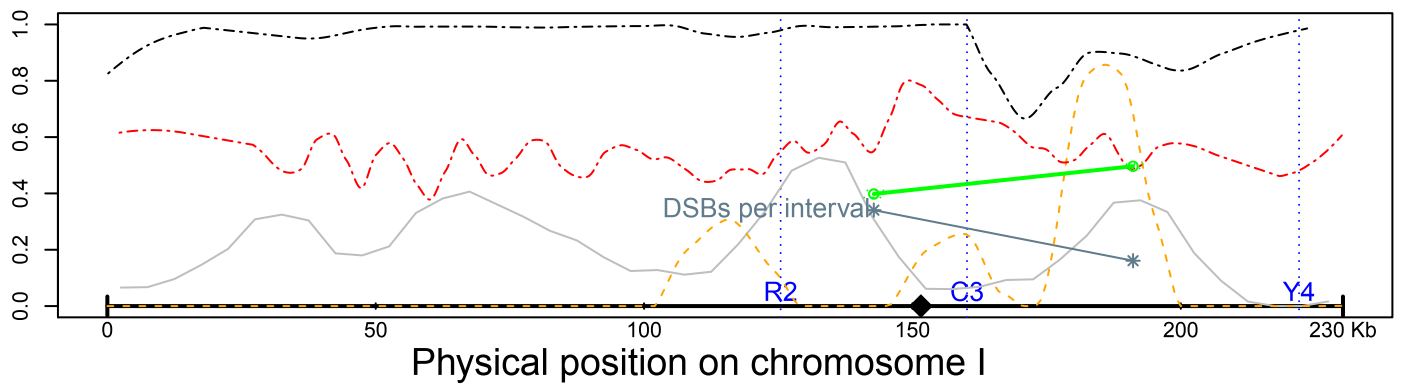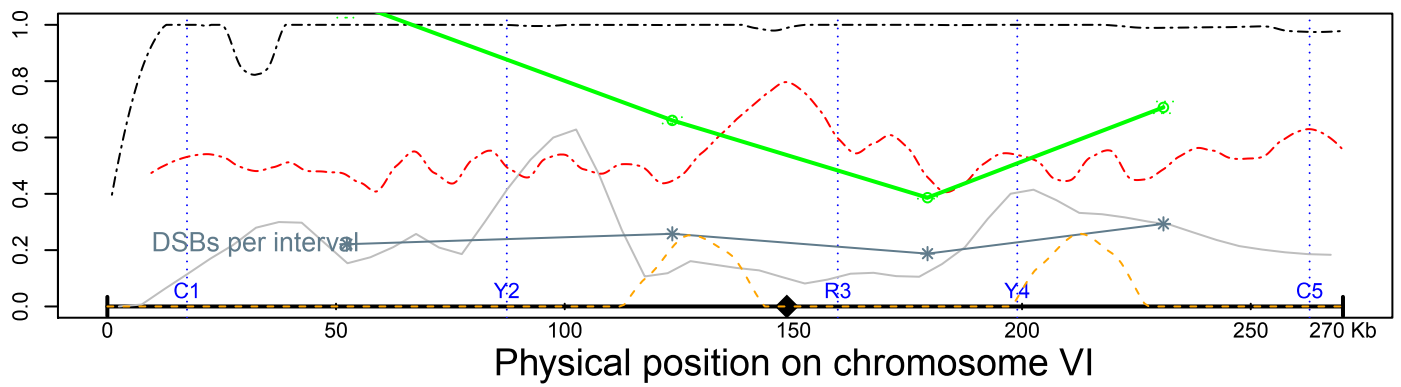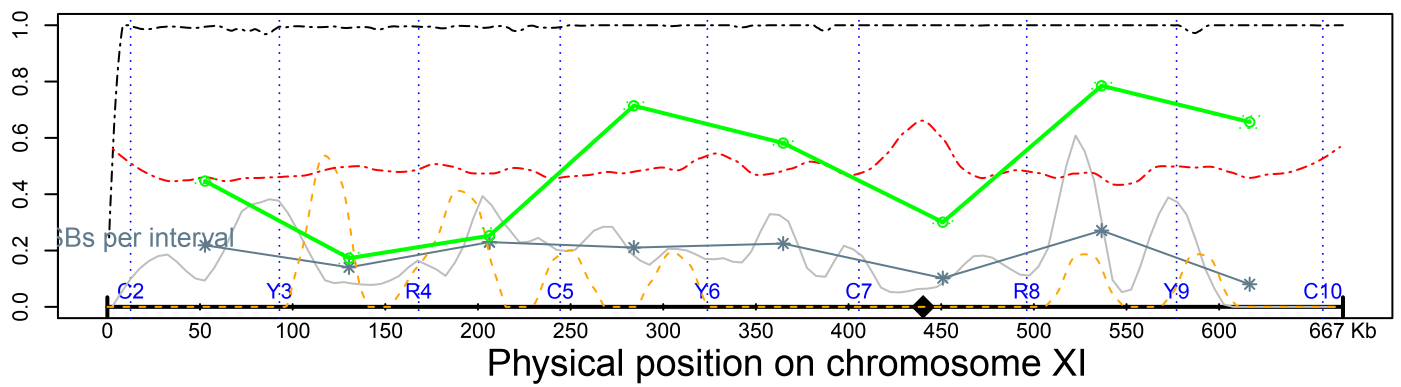

—○— Recombination rate

— DSB level  
 — DSBs per interval  
 - - - H3K4me3 level  
 - - - Sequence similarity  
 - - - Rec8 level

# Hybrid SK1 X UWOPS83\_787\_3

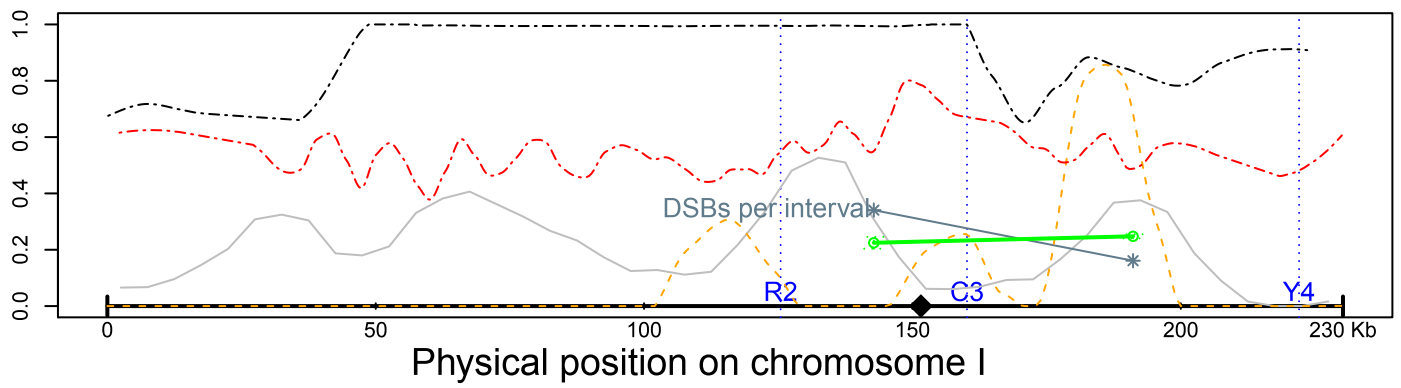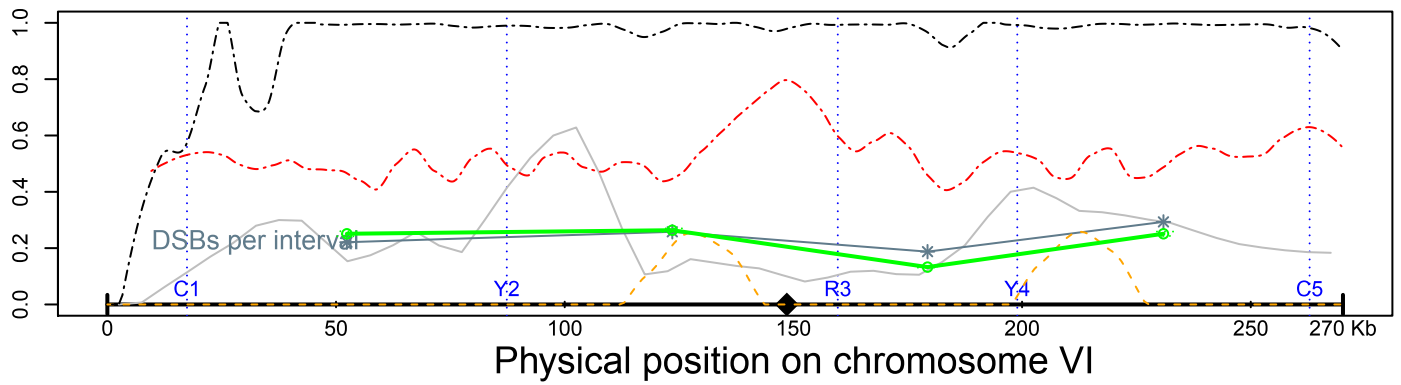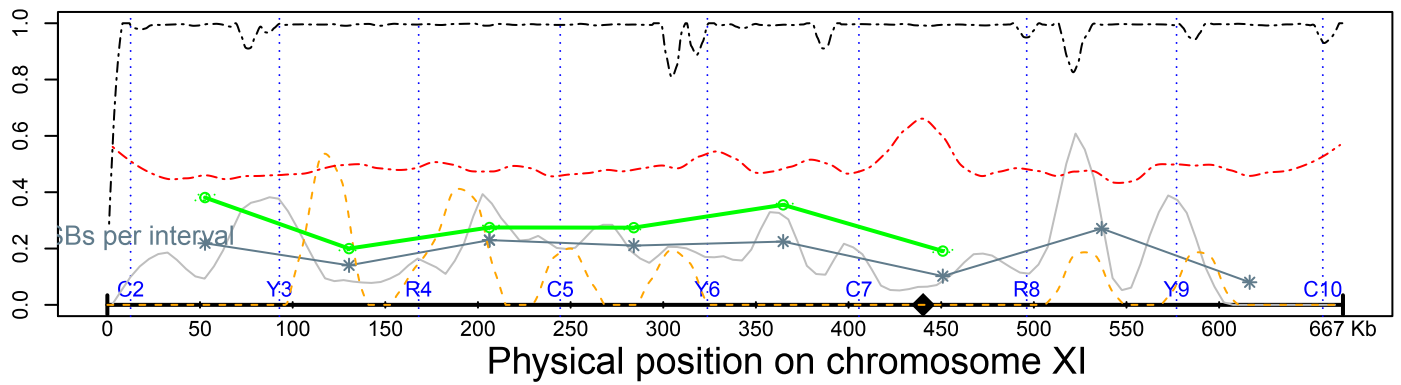

—○— Recombination rate

— DSB level  
 — DSBs per interval  
 - - - H3K4me3 level  
 - - - Sequence similarity  
 - - - Rec8 level



# Hybrid SK1 X SK1

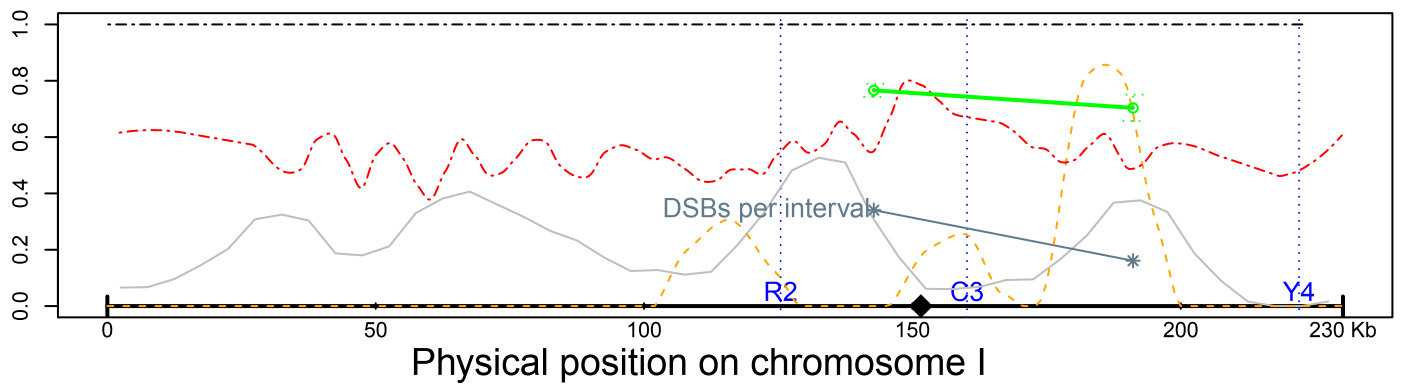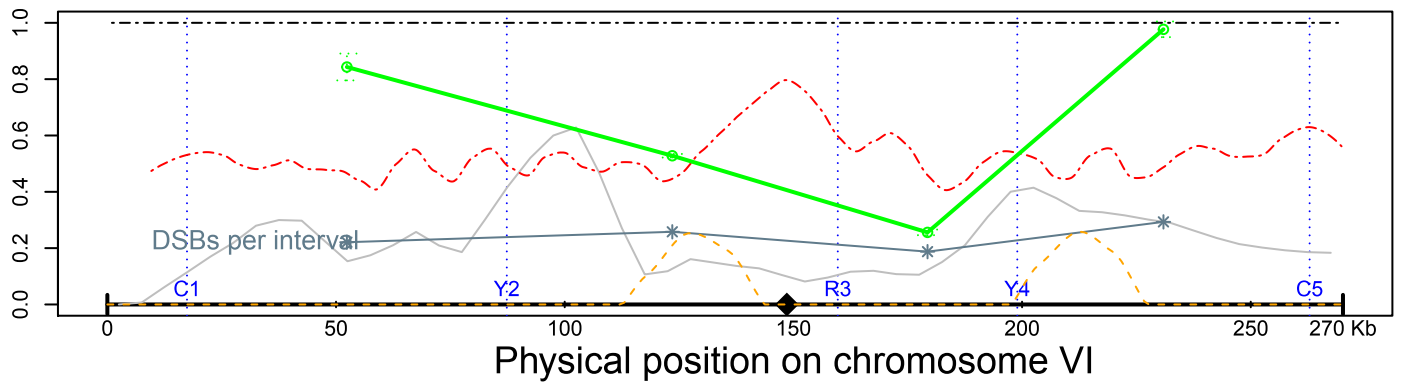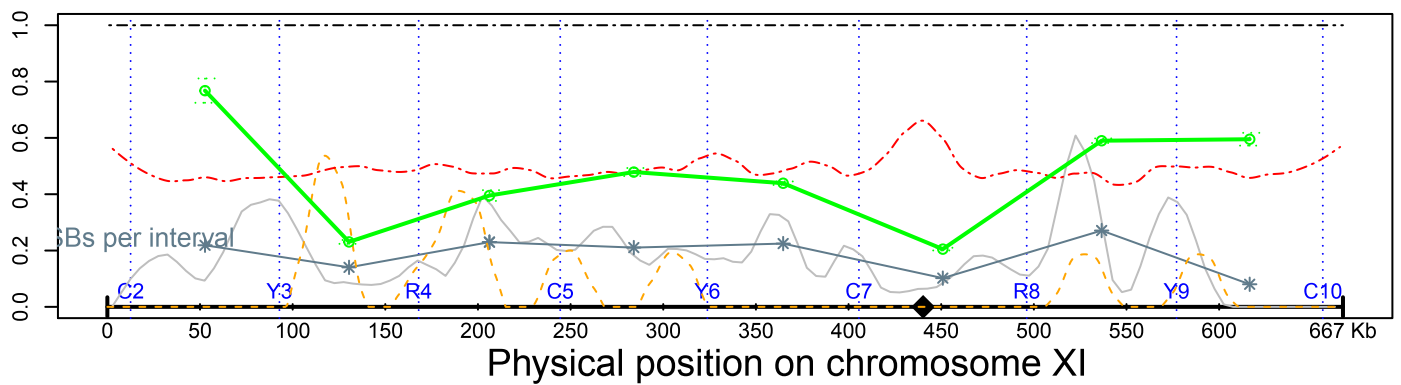

—○— Recombination rate

— DSB level  
— DSBs per interval  
- - - H3K4me3 level  
- - - Sequence similarity  
- - - Rec8 level

# Hybrid SK1 X BC187

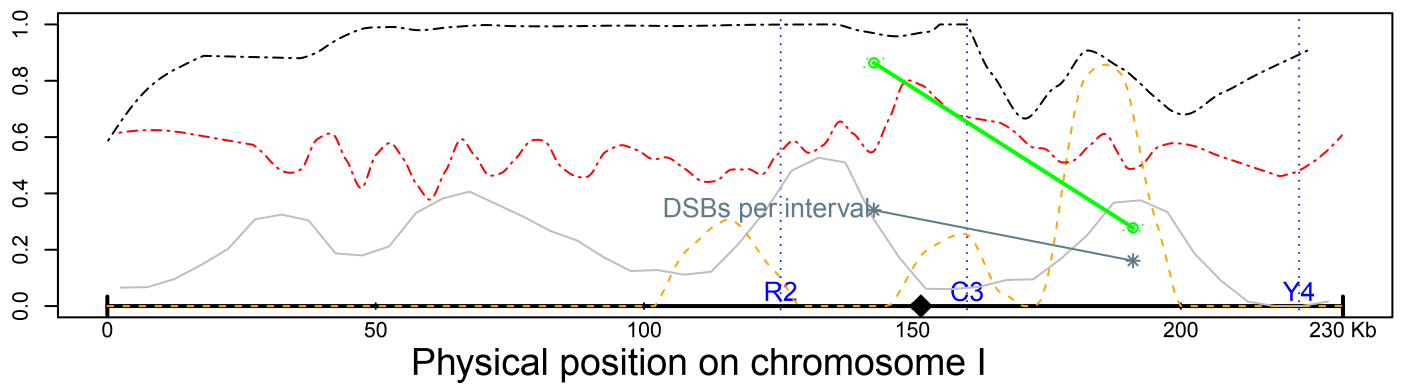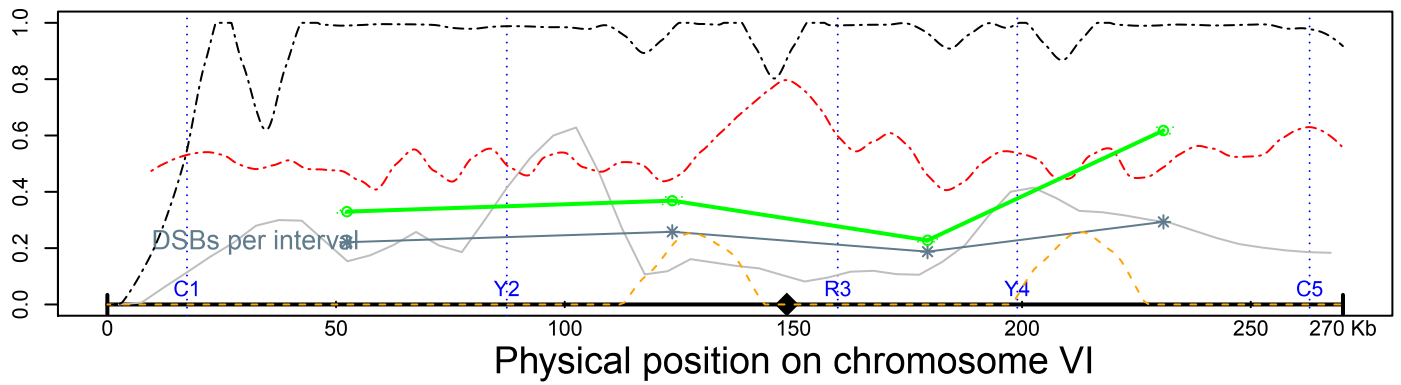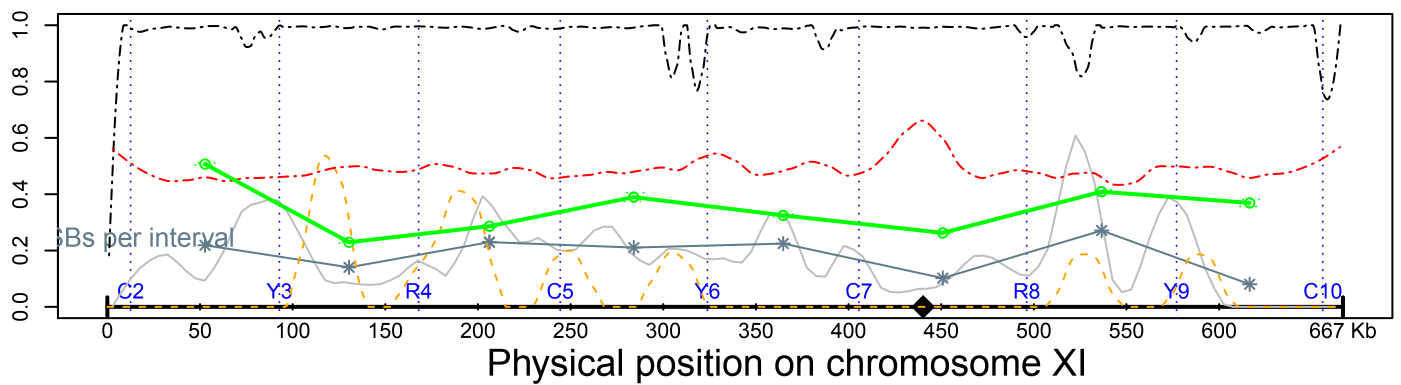

—○— Recombination rate

— DSB level  
 — DSBs per interval  
 - - - H3K4me3 level  
 - - - Sequence similarity  
 - - - Rec8 level

# Hybrid SK1 X YJM978

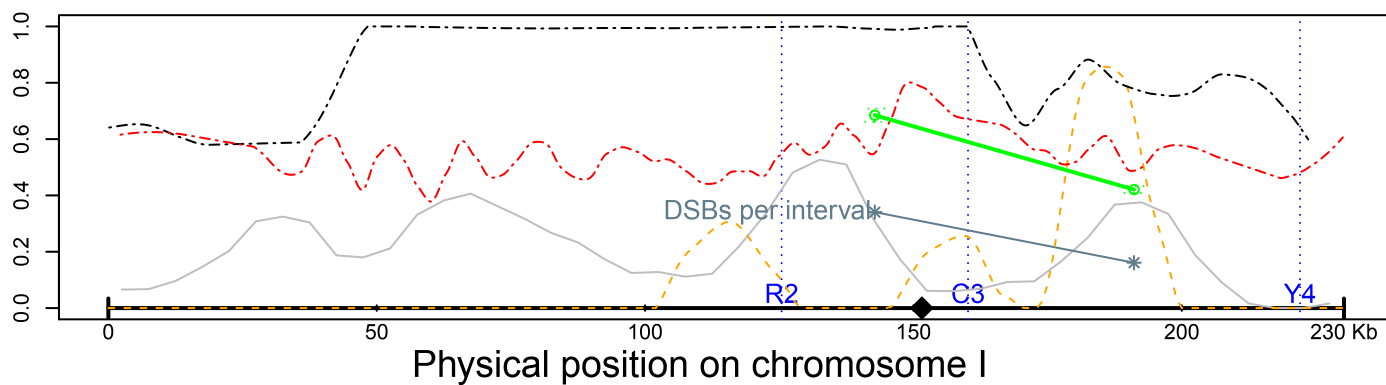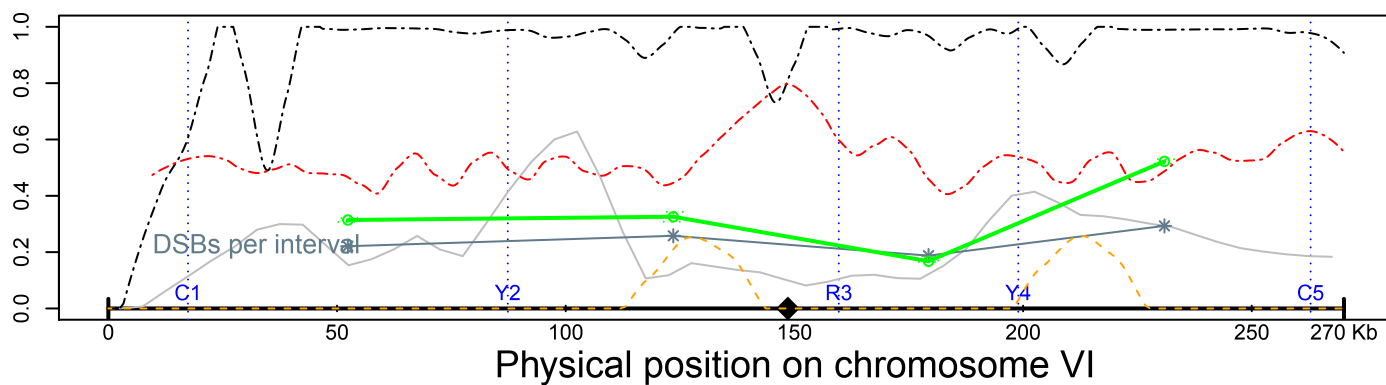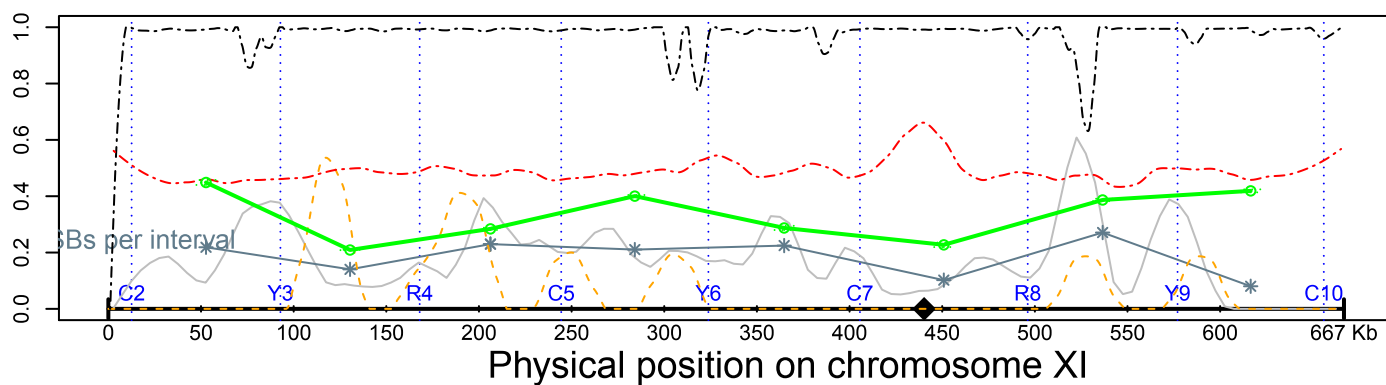

—○— Recombination rate

— DSB level  
 — DSBs per interval  
 - - - H3K4me3 level  
 - - - Sequence similarity  
 - - - Rec8 level

# Hybrid SK1 X YJM981

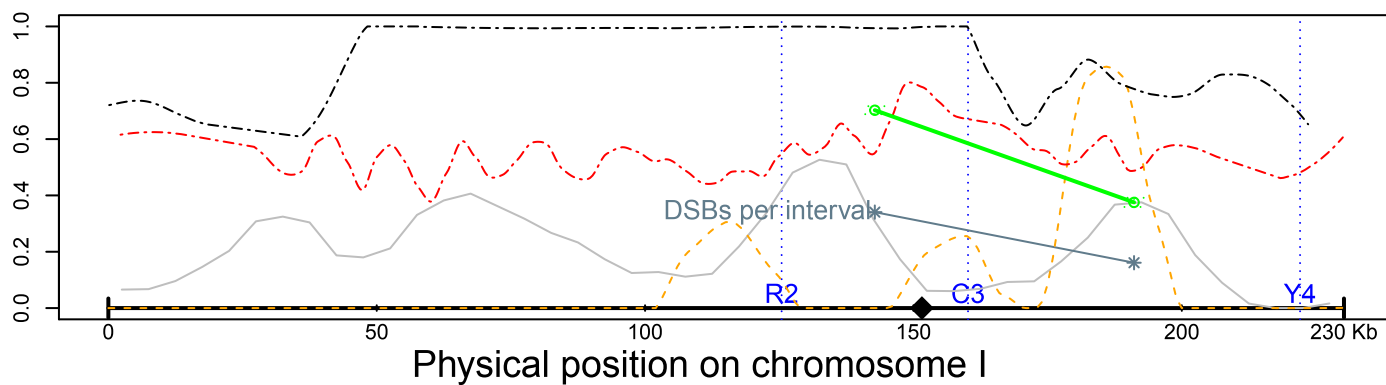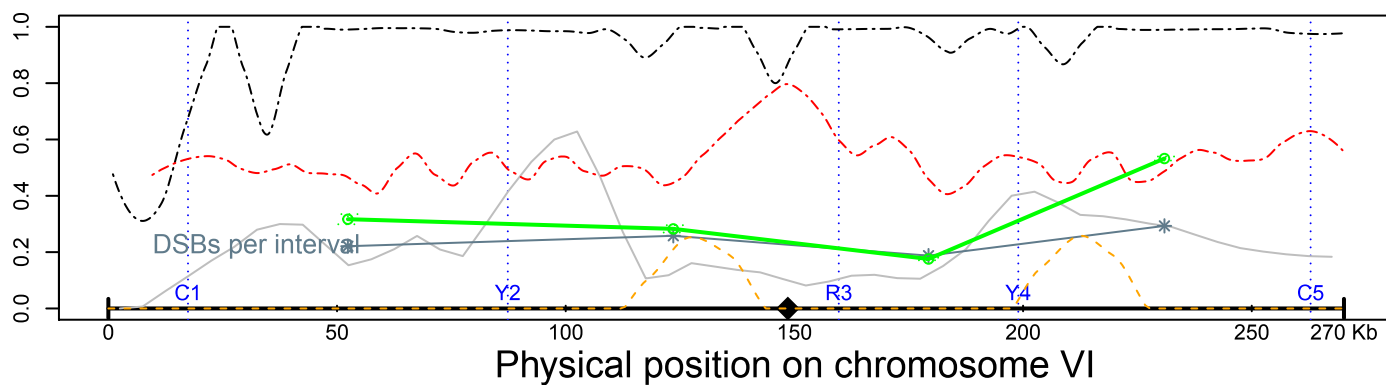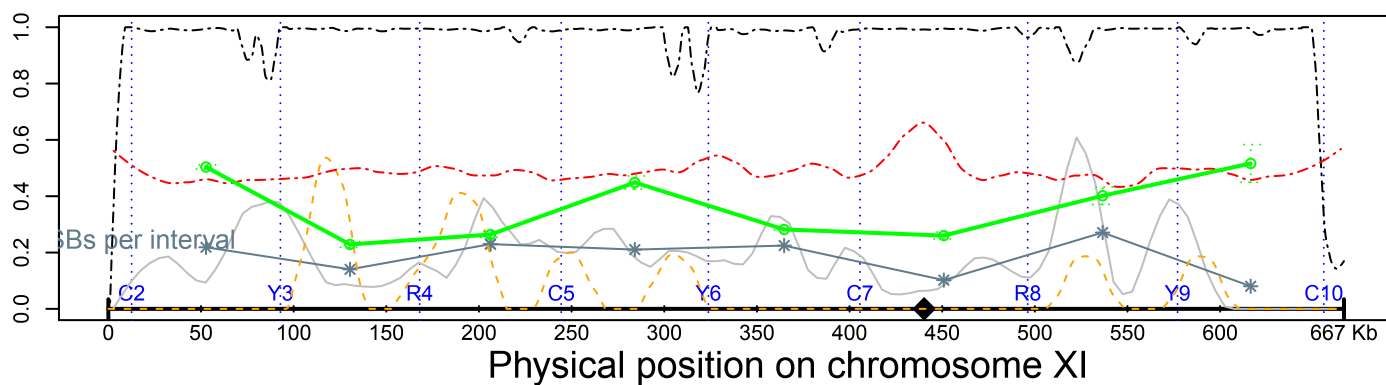

—○— Recombination rate

— DSB level  
 — DSBs per interval  
 - - - H3K4me3 level  
 - - - Sequence similarity  
 - - - Rec8 level

# Hybrid SK1 X YJM975

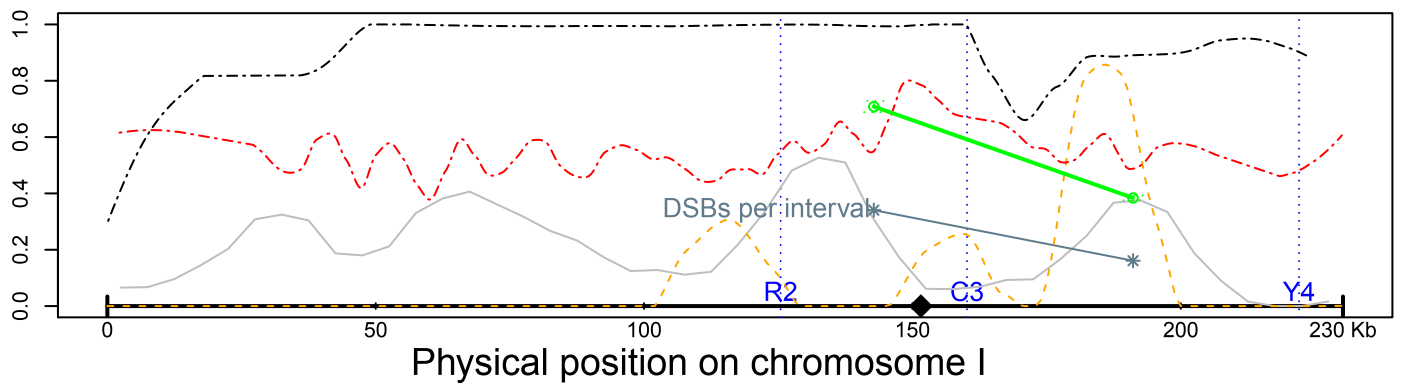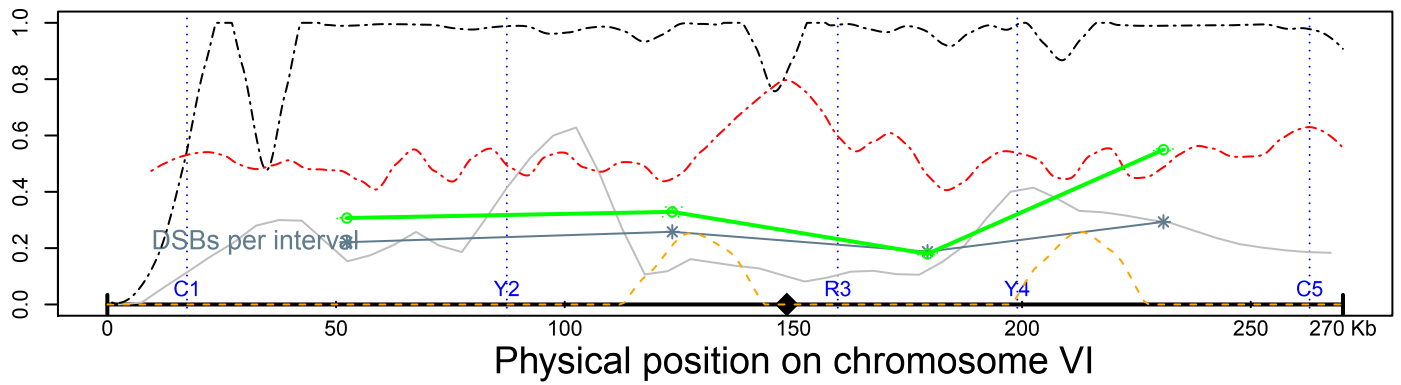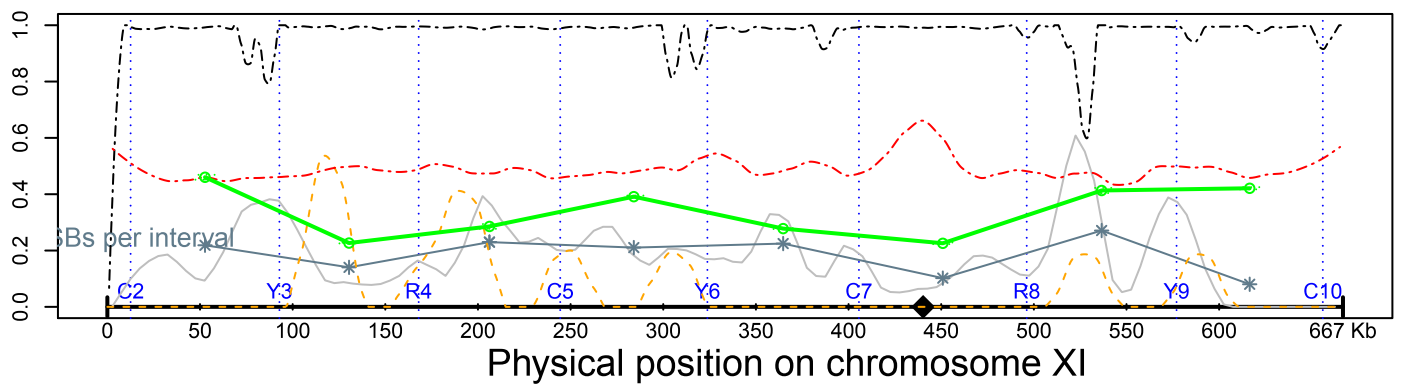

—○— Recombination rate

— DSB level  
 — DSBs per interval  
 - - - H3K4me3 level  
 - - - Sequence similarity  
 - - - Rec8 level

# Hybrid SK1 X DBVPG1373

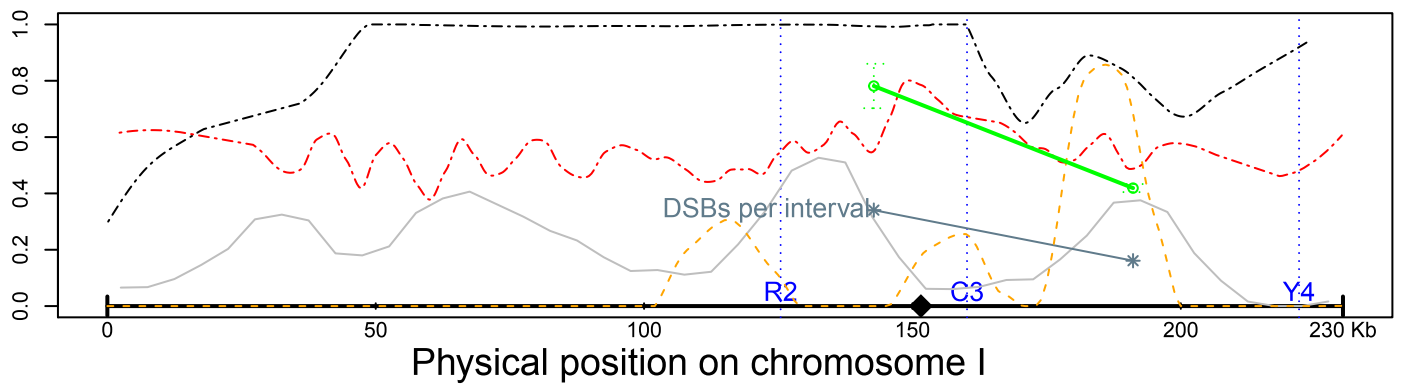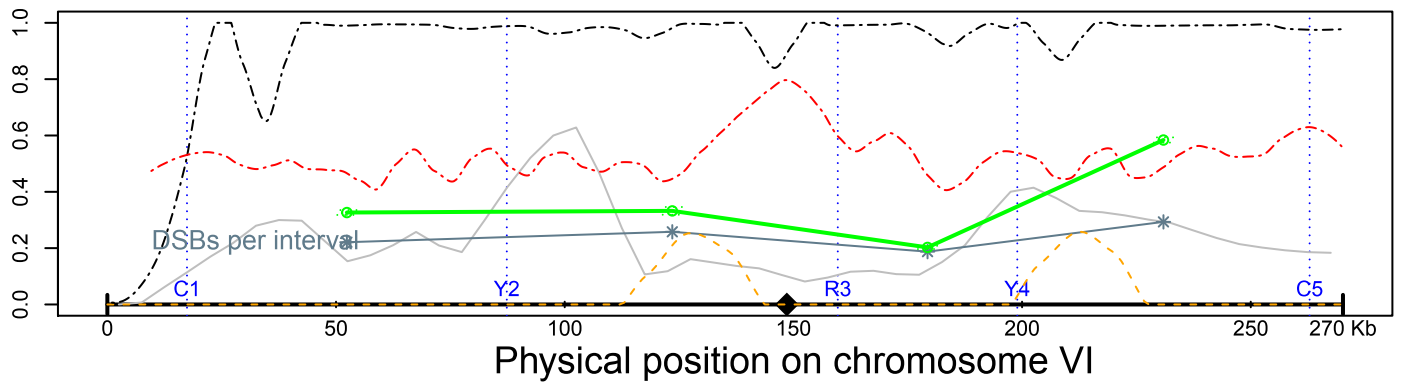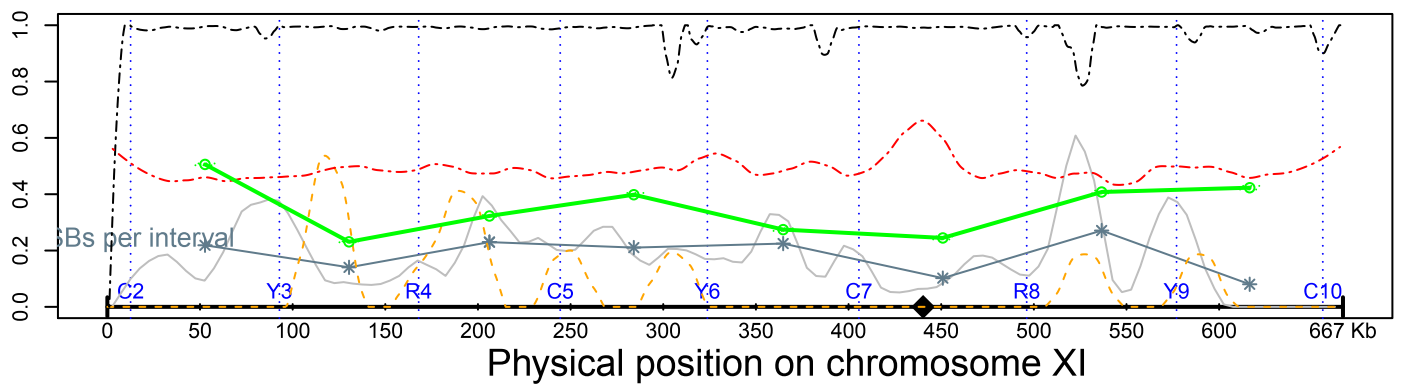

—○— Recombination rate

— DSB level  
 — DSBs per interval  
 - - - H3K4me3 level  
 - - - Sequence similarity  
 - - - Rec8 level

# Hybrid SK1 X DBVPG1106

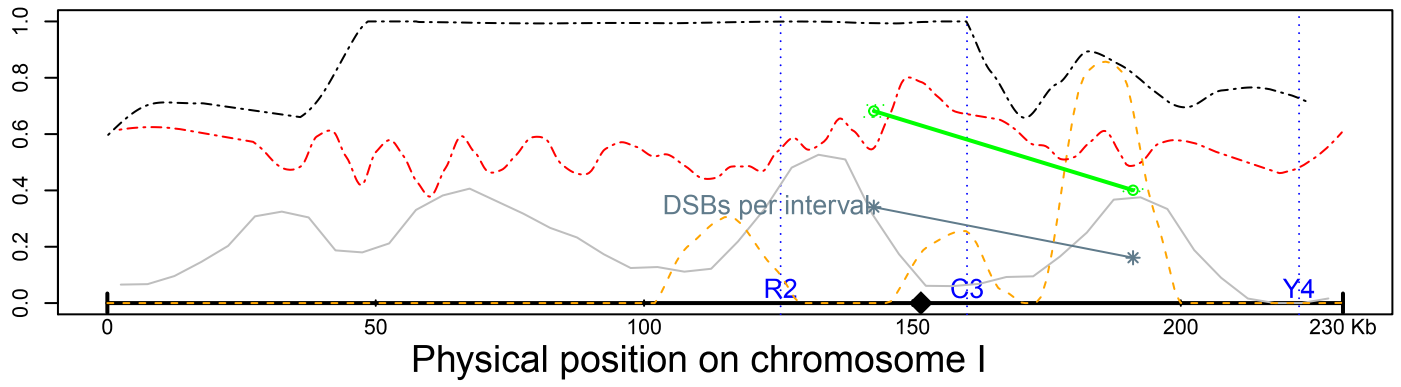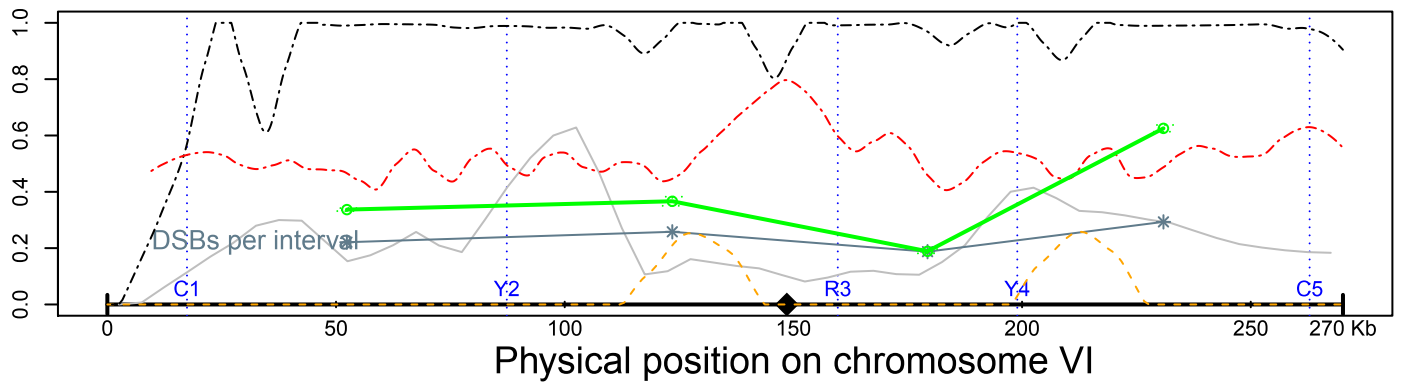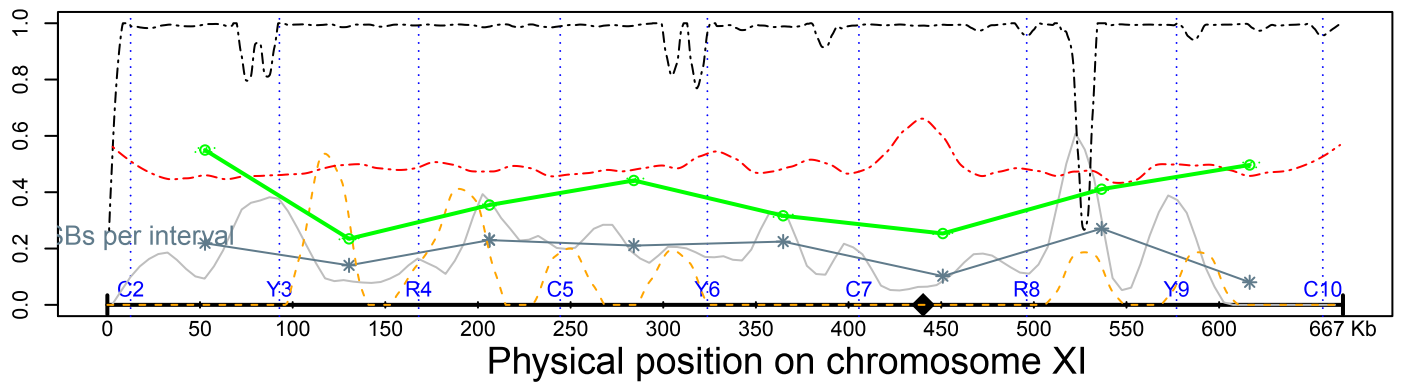

—○— Recombination rate

— DSB level  
 — DSBs per interval  
 - - - H3K4me3 level  
 - - - Sequence similarity  
 - - - Rec8 level

# Hybrid SK1 X DBVPG6765

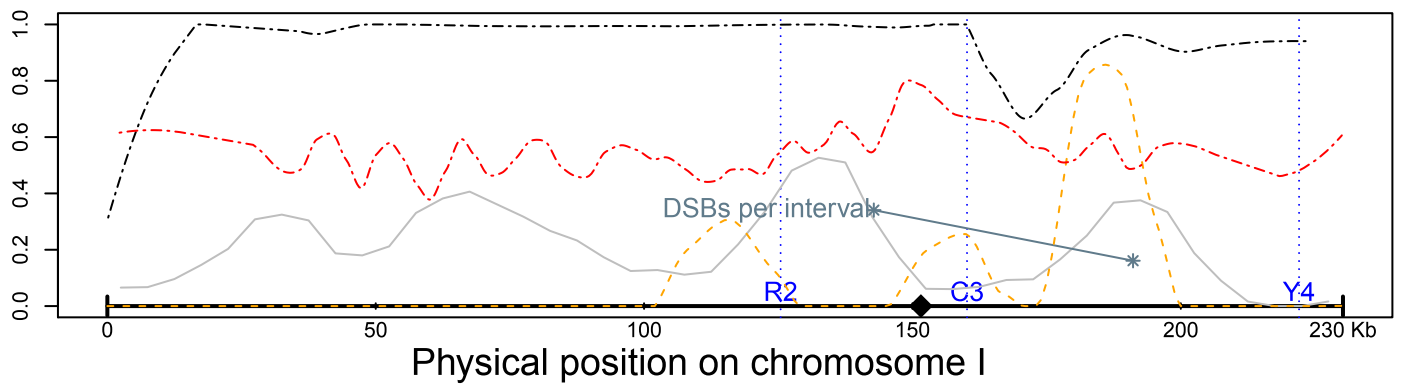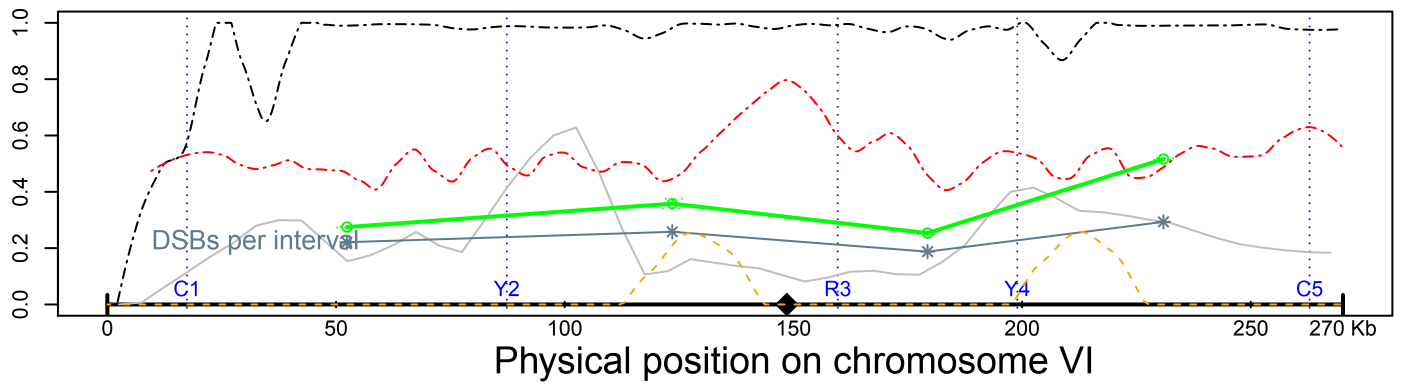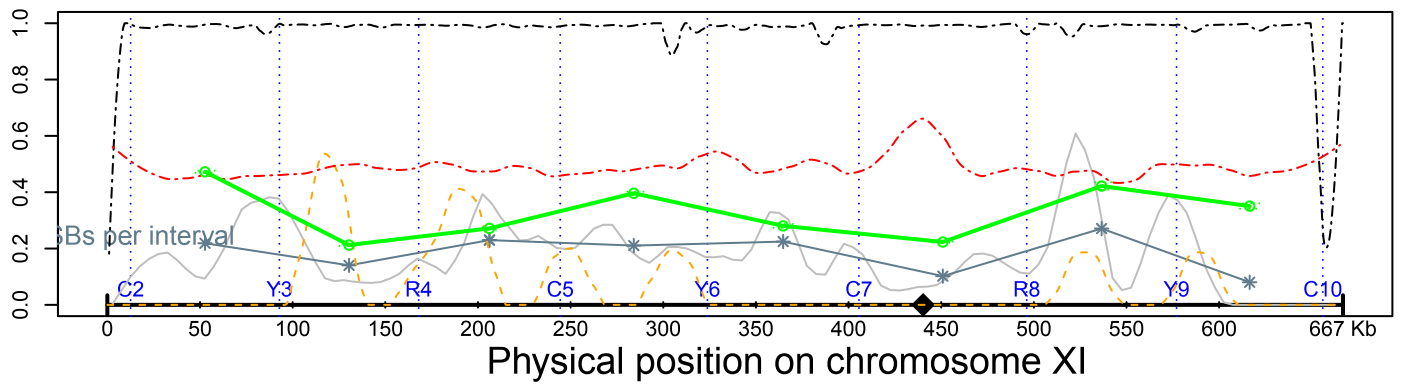

—○— Recombination rate

— DSB level  
— DSBs per interval  
- - - H3K4me3 level  
- - - Sequence similarity  
- - - Rec8 level



# Hybrid SK1 X L\_1374

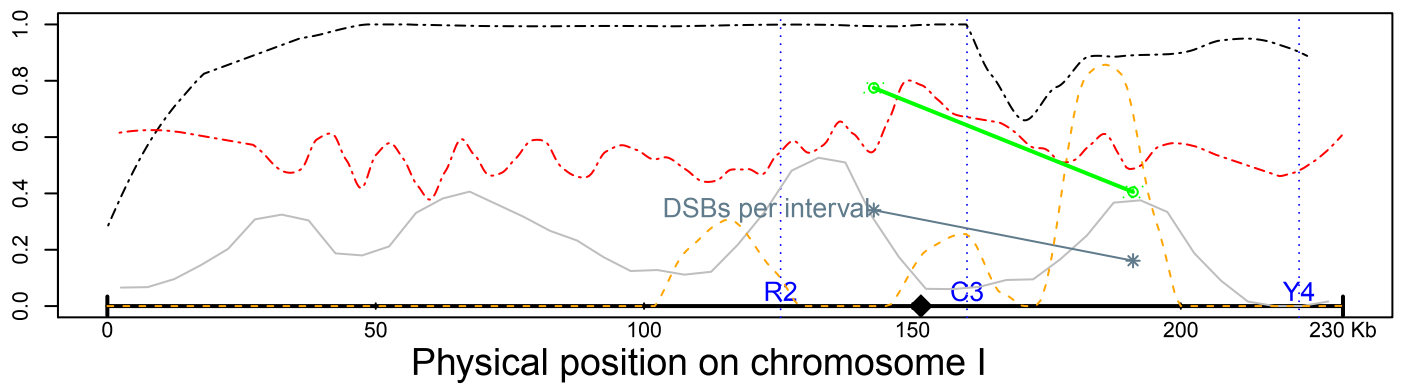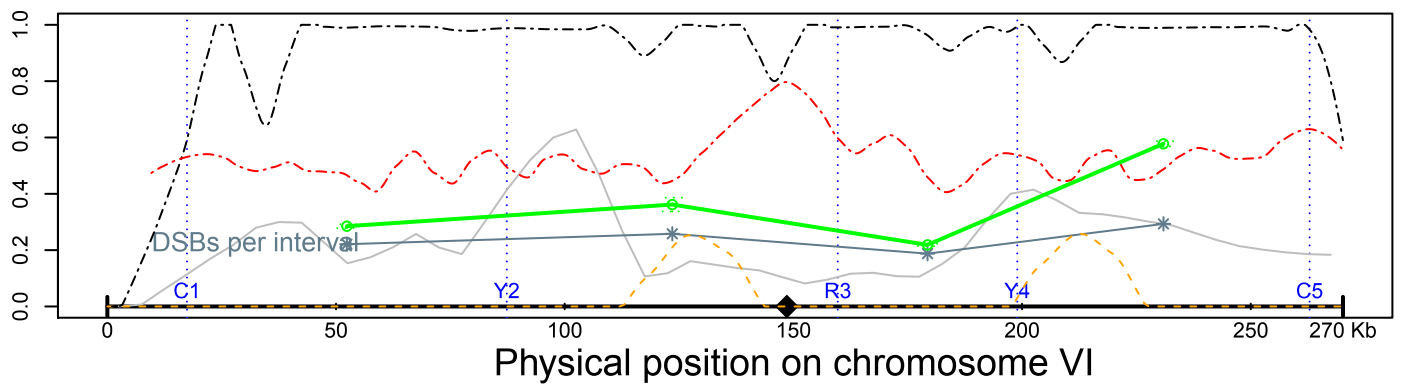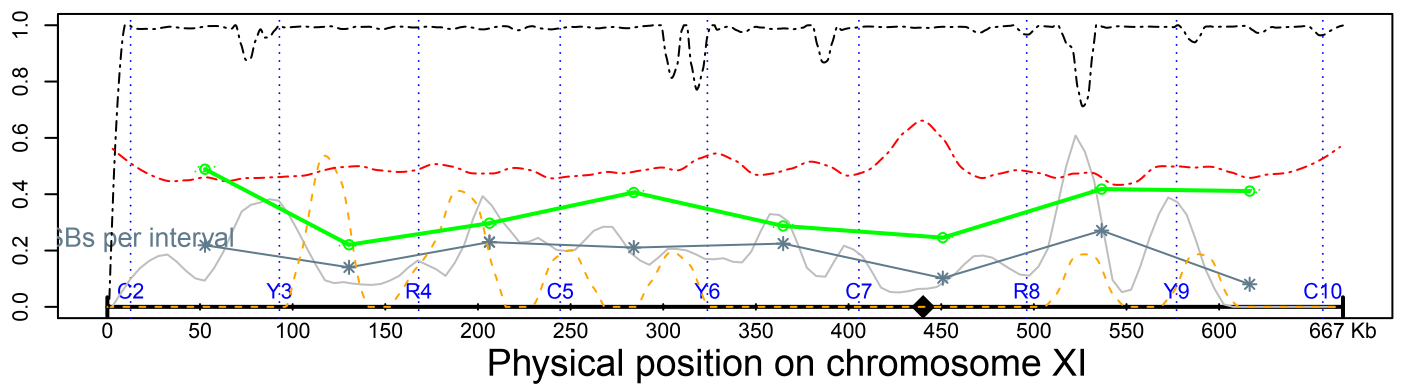

—○— Recombination rate

— DSB level  
 — DSBs per interval  
 - - - H3K4me3 level  
 - - - Sequence similarity  
 - - - Rec8 level

# Hybrid SK1 X L\_1528

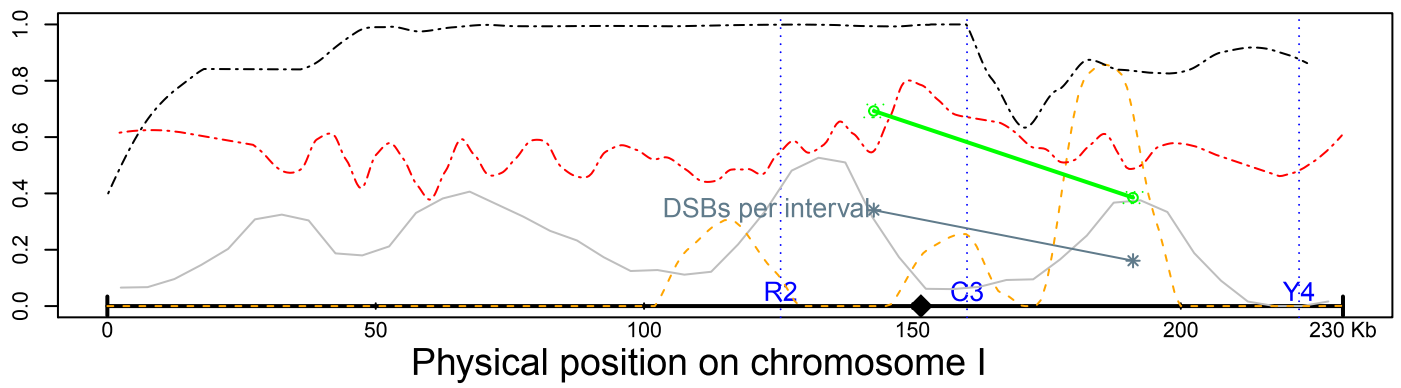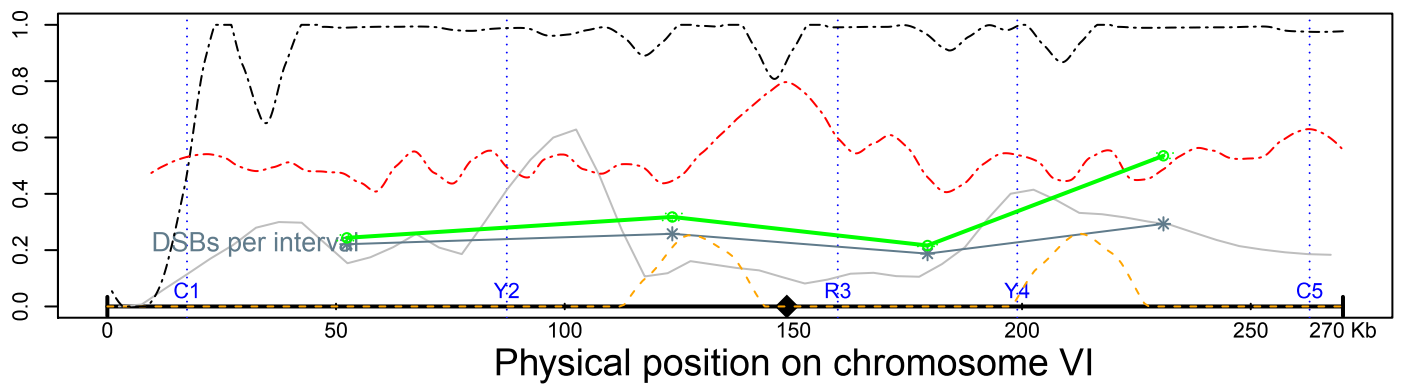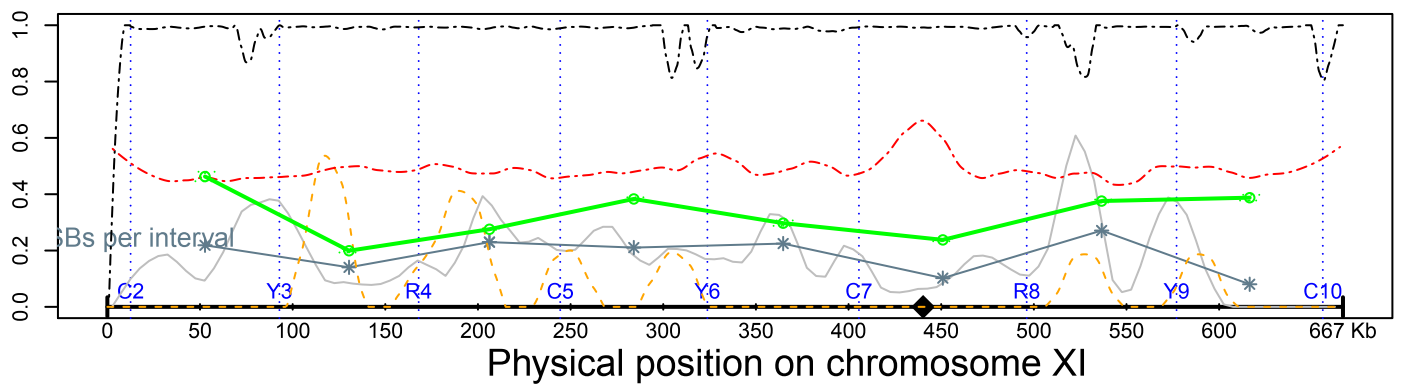

—○— Recombination rate

— DSB level  
 — DSBs per interval  
 - - - H3K4me3 level  
 - - - Sequence similarity  
 - - - Rec8 level

# Hybrid SK1 X DBVPG6044

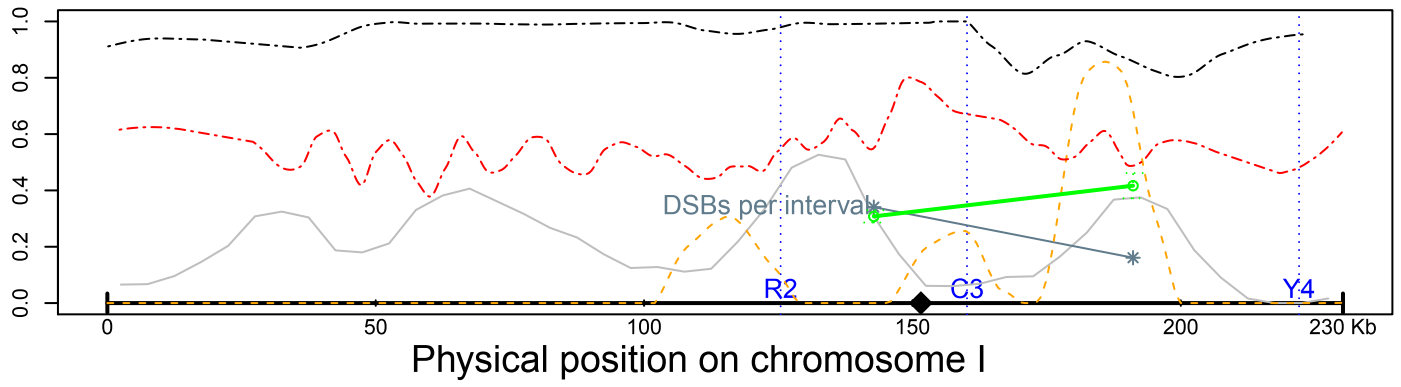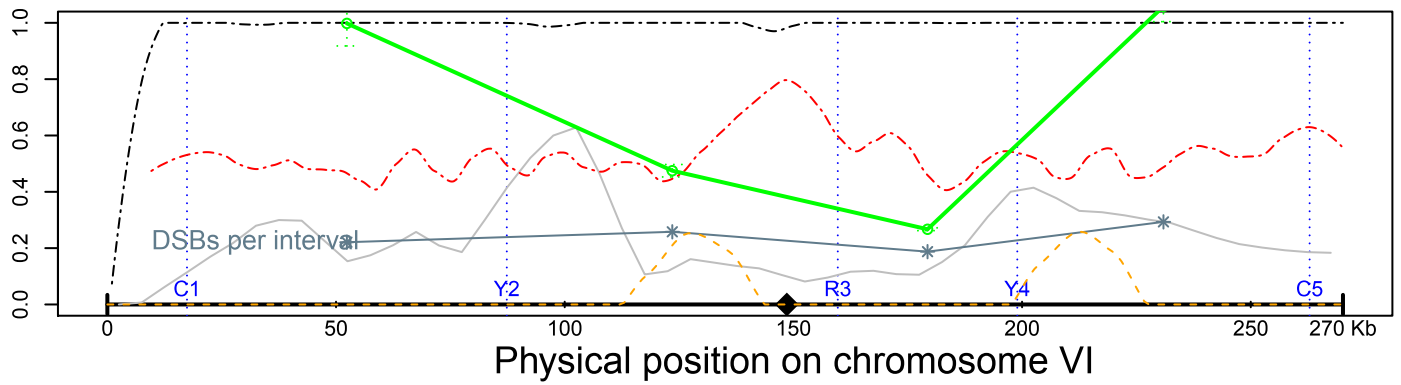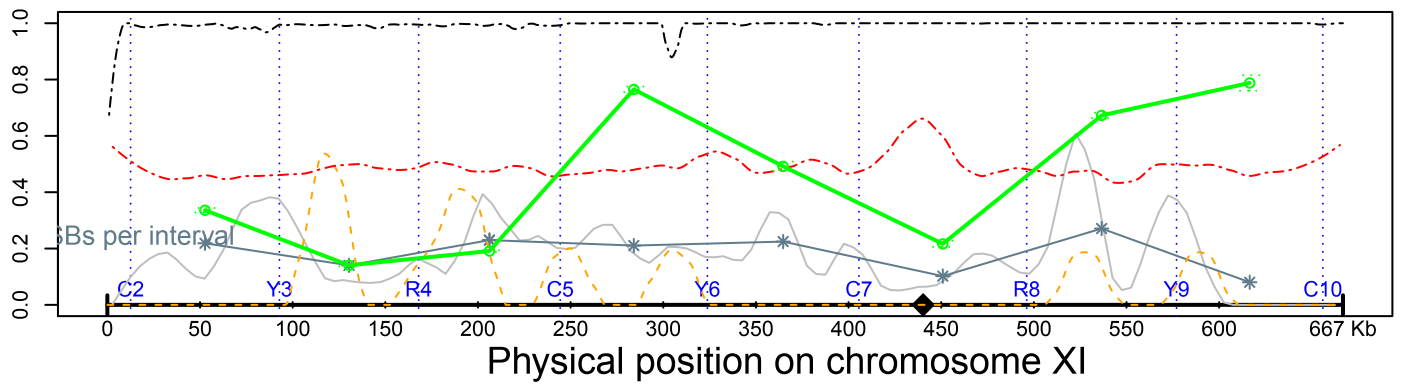

—○— Recombination rate

— DSB level  
— DSBs per interval  
- - - H3K4me3 level  
- - - Sequence similarity  
- - - Rec8 level

# Hybrid SK1 X NCYC110

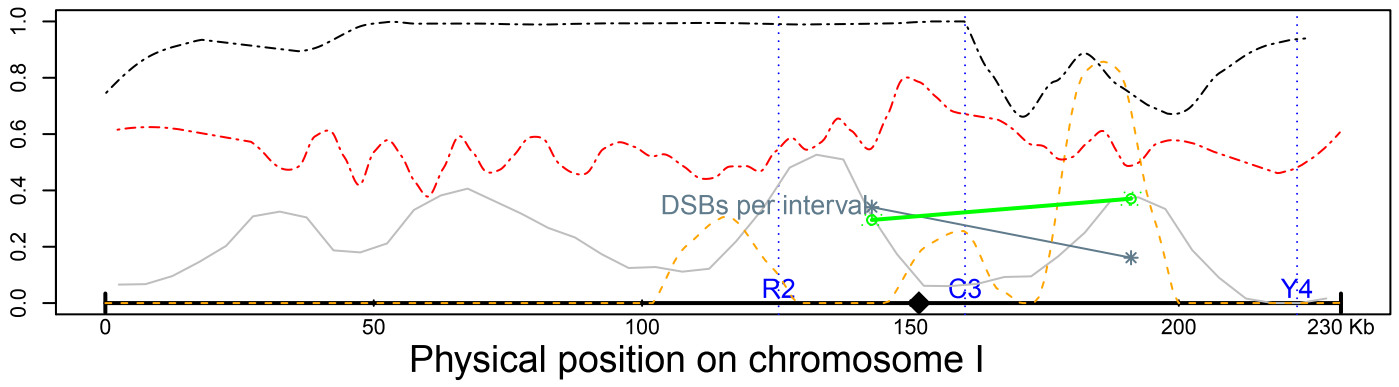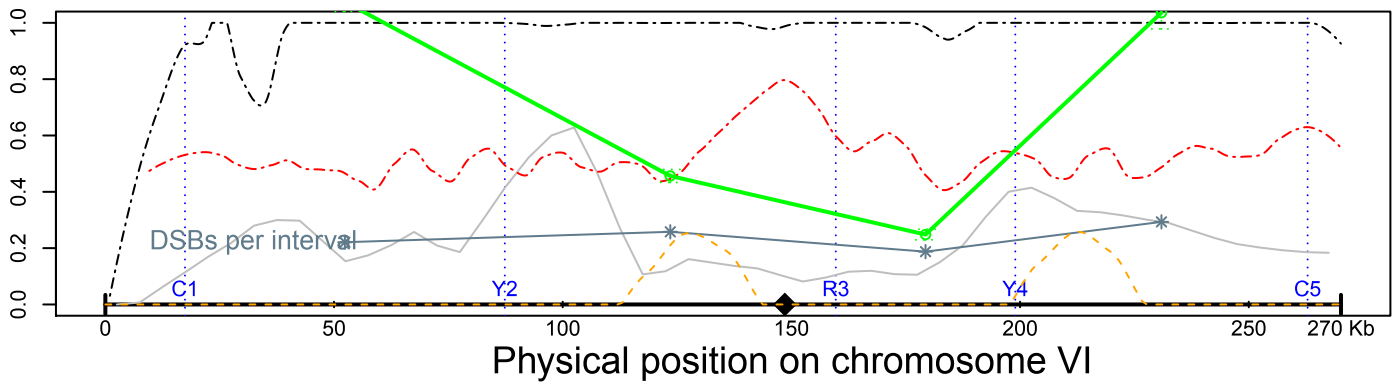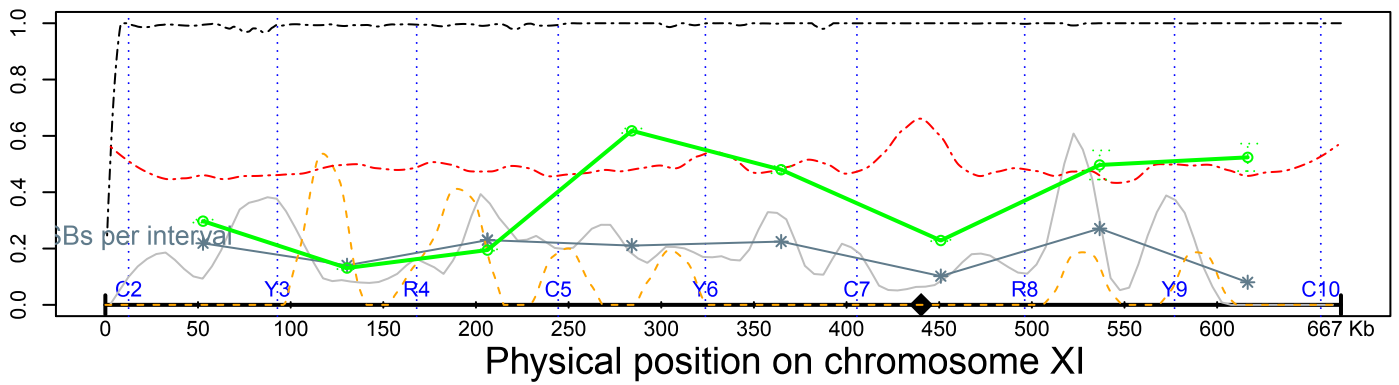

—○— Recombination rate

— DSB level  
 — DSBs per interval  
 - - - H3K4me3 level  
 - - - Sequence similarity  
 - - - Rec8 level

# Hybrid SK1 X Y12

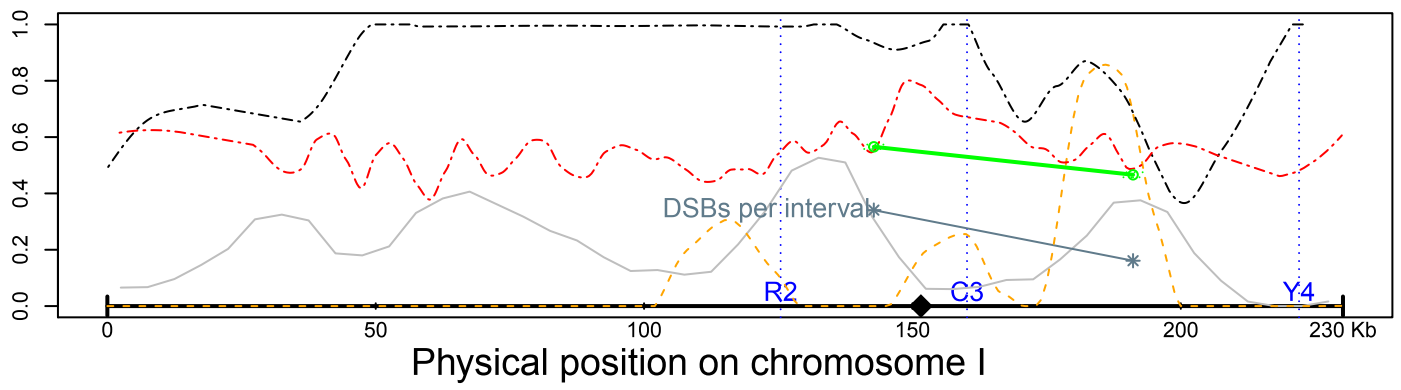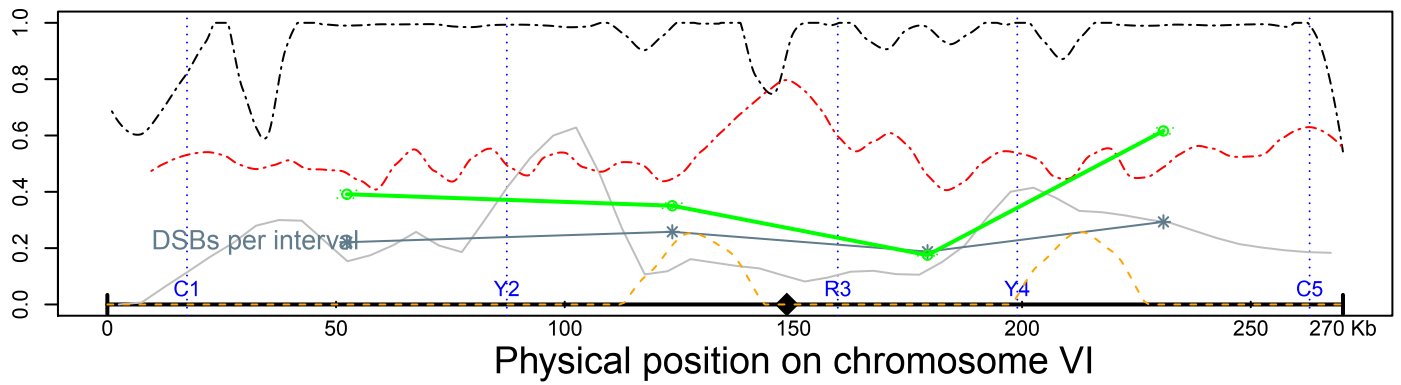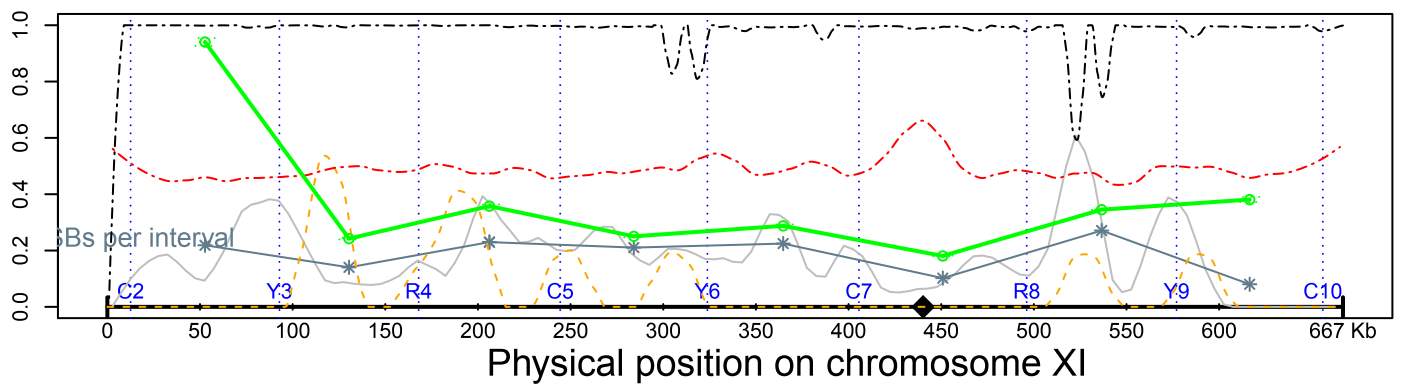

—○— Recombination rate

— DSB level  
 — DSBs per interval  
 - - - H3K4me3 level  
 - - - Sequence similarity  
 - - - Rec8 level

# Hybrid SK1 X YPS606

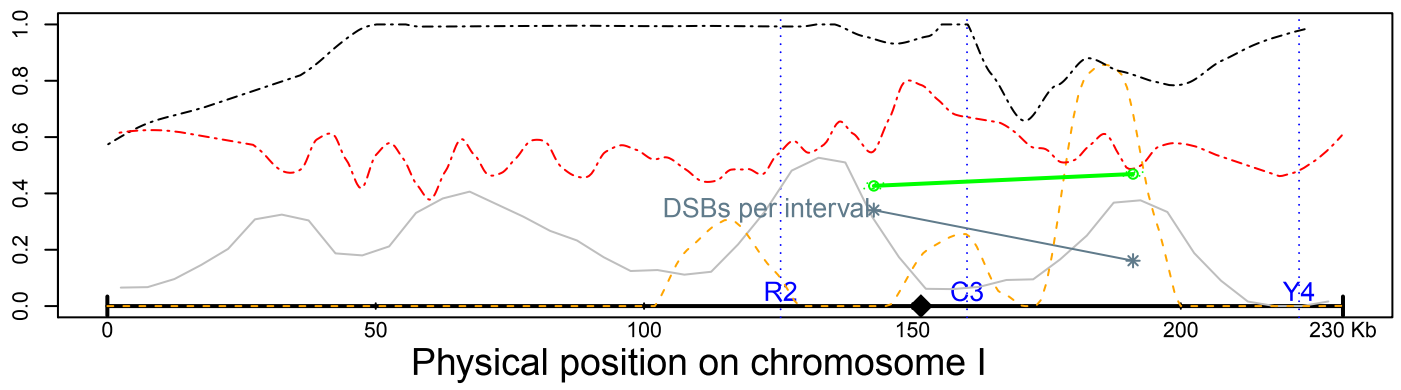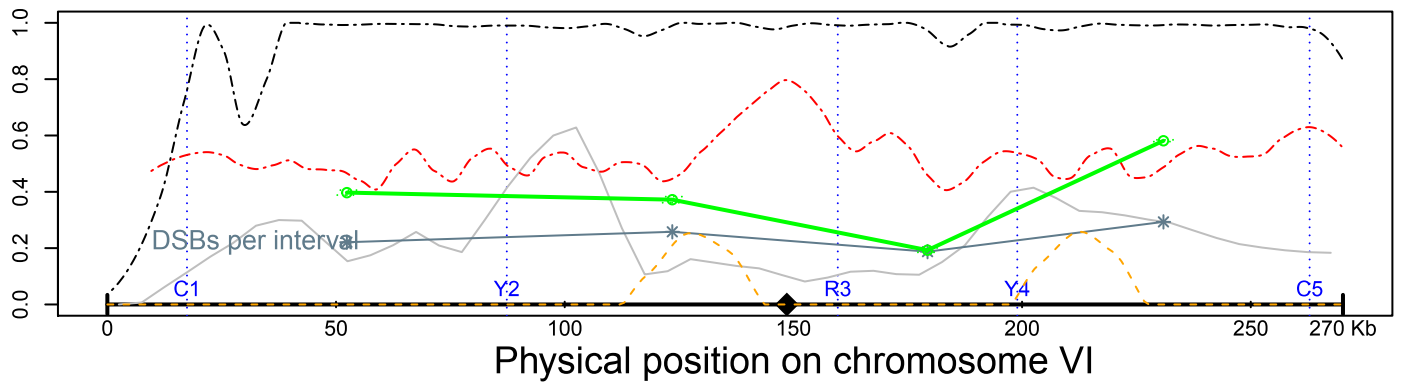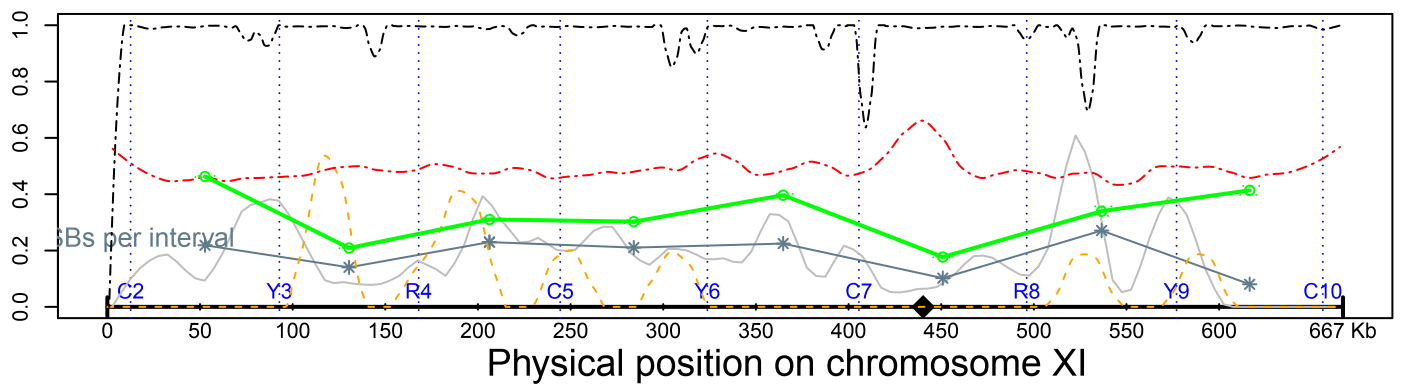

—○— Recombination rate

— DSB level  
 — DSBs per interval  
 - - - H3K4me3 level  
 - - - Sequence similarity  
 - - - Rec8 level

# Hybrid SK1 X YPS128

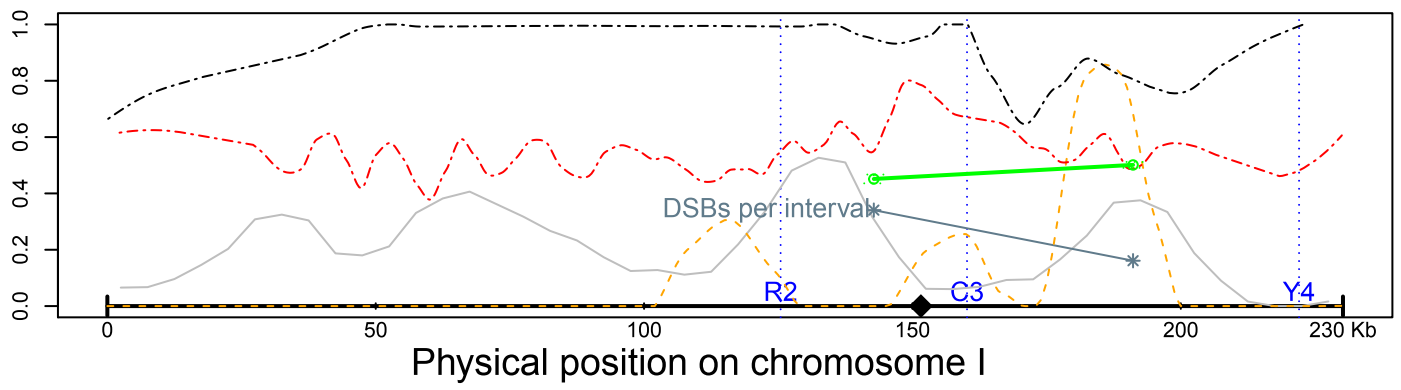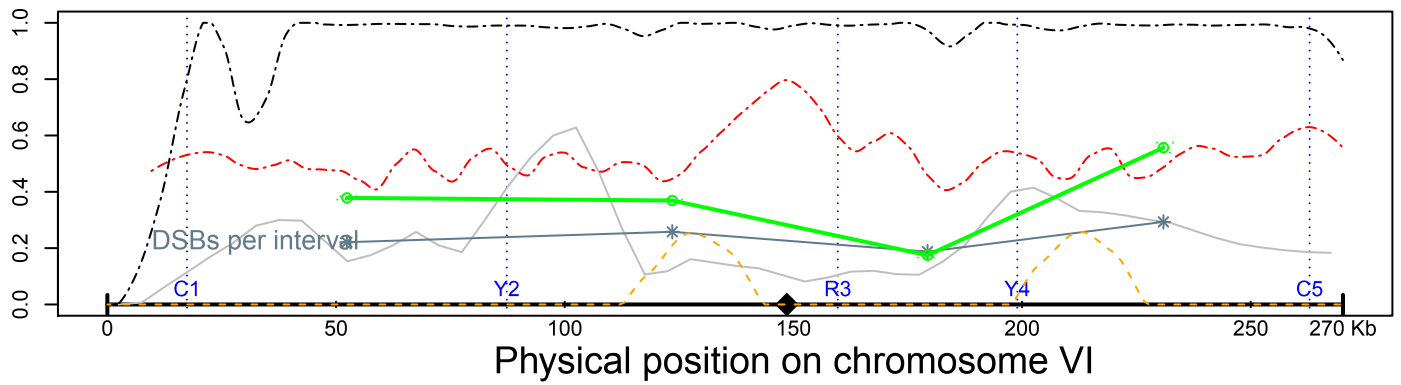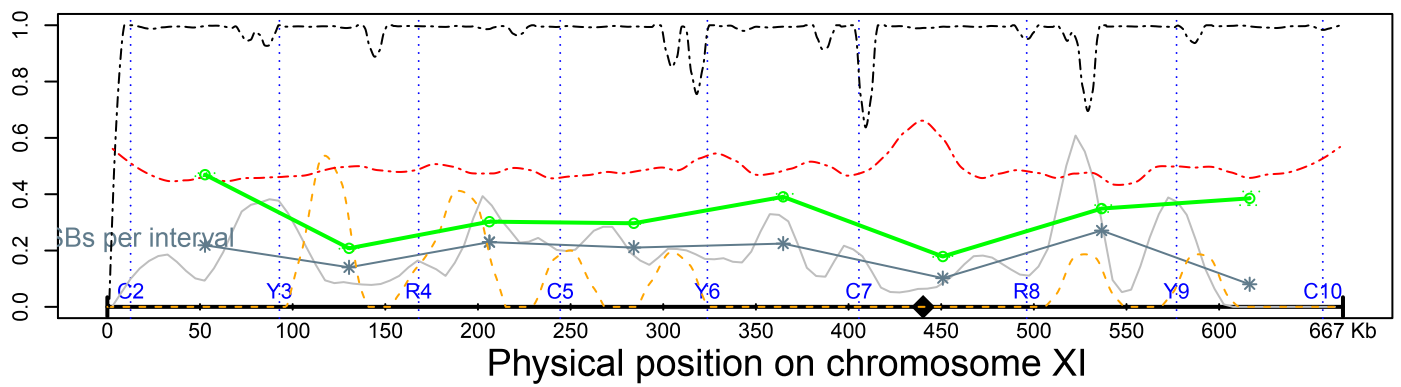

—○— Recombination rate

— DSB level  
 — DSBs per interval  
 - - - H3K4me3 level  
 - - - Sequence similarity  
 - - - Rec8 level
