# Supplementary material
Source: publisher figshare collection journal article supplement (https://gsajournals.figshare.com/articles/dataset/_/7166009)
Supplement: Supplementary file 6 [file 2]

| Strain # | Name          | Origin   | Phylogenetic group | Habitat      |
|----------|---------------|----------|--------------------|--------------|
| 3582     | UWOPS87_2421  | Americas | Unknown            | Wild         |
| 3583     | W303          | Unknown  | Unknown            | Laboratory   |
| 3584     | YS9           | Asia     | Unknown            | Baking       |
| 3585     | 273614N       | Europe   | Unknown            | Clinical     |
| 3586     | YIIC17_E5     | Europe   | Unknown            | Fermentation |
| 3587     | 322134S       | Europe   | Unknown            | Clinical     |
| 3588     | Y55           | Europe   | Unknown            | Laboratory   |
| 3589     | UWOPS83_787_3 | Americas | Unknown            | Wild         |
| 3590     | SK1           | Americas | Unknown            | Laboratory   |
| 3591     | BC187         | Americas | WineEuropean       | Fermentation |
| 3592     | YJM978        | Europe   | WineEuropean       | Clinical     |
| 3593     | YJM981        | Europe   | WineEuropean       | Clinical     |
| 3594     | YJM975        | Europe   | WineEuropean       | Clinical     |
| 3595     | DBVPG1373     | Europe   | WineEuropean       | Wild         |
| 3596     | DBVPG1106     | Oceania  | WineEuropean       | Fermentation |
| 3597     | DBVPG6765     | Unknown  | WineEuropean       | Unknown      |
| 3598     | L_1374        | Americas | WineEuropean       | Fermentation |
| 3599     | L_1528        | Americas | WineEuropean       | Fermentation |
| 3600     | DBVPG6044     | Africa   | WestAfrican        | Fermentation |
| 3601     | NCYC110       | Africa   | WestAfrican        | Fermentation |
| 3602     | UWOPS03_461_4 | Asia     | Malaysian          | Wild         |
| 3603     | UWOPS05_217_3 | Asia     | Malaysian          | Wild         |
| 3604     | UWOPS05_227_2 | Asia     | Malaysian          | Wild         |
| 3605     | Y12           | Africa   | Sake               | Fermentation |
| 3606     | YPS606        | Americas | NorthAmerican      | Wild         |
| 3607     | YPS128        | Americas | NorthAmerican      | Wild         |

**Supp Table 1:** Strain code, name, origin, phylogenetic group, and habitat of the strains used. Extracted from table 1 of (Liti et al. 2009)

| Chromosome | Tester     | Interval | Lowest strain | Recombination rate cM/kbp | Highest strain | Recombination rate cM/kbp | <i>p</i> -value | Ratio |
|------------|------------|----------|---------------|---------------------------|----------------|---------------------------|-----------------|-------|
| I          | I-R2C3Y4   | R2C3     | UWOPS83_787_3 | 0.22                      | BC187          | 0.86                      | 5.4e-09         | 3.84  |
|            |            | C3Y4     | UWOPS87_2421  | 0.19                      | SK1            | 0.7                       | 6.4e-07         | 3.77  |
| VI         | VI-C1Y2R3  | C1Y2     | YIlc17_E5     | 0.16                      | Y55            | 1.09                      | 9.1e-08         | 6.81  |
|            |            | Y2R3     | YIlc17_E5     | 0.18                      | Y55            | 0.66                      | 3.1e-10         | 3.59  |
| VI         | VI-R3Y4C5  | R3Y4     | UWOPS83_787_3 | 0.13                      | Y55            | 0.39                      | 2.2e-11         | 2.91  |
|            |            | Y4C5     | YIlc17_E5     | 0.11                      | DBVPG6044      | 1.06                      | 4.2e-08         | 9.46  |
| XI         | XI-R1C2Y3  | R1C2     |               |                           | Not used       |                           |                 |       |
|            |            | C2Y3     | YIlc17_E5     | 0.21                      | Y12            | 0.94                      | 7.6e-11         | 4.46  |
| XI         | XI-Y3R4C5  | Y3R4     | NCYC110       | 0.13                      | 322134S        | 0.27                      | 1.3e-09         | 2.03  |
|            |            | R4C5     | YIlc17_E5     | 0.16                      | SK1            | 0.37                      | 4.3e-07         | 2.32  |
| XI         | XI-R4C5Y6  | R4C5     | YIlc17_E5     | 0.16                      | SK1            | 0.38                      | 5.4e-08         | 2.37  |
|            |            | C5Y6     | YIlc17_E5     | 0.23                      | DBVPG6044      | 0.77                      | 9.6e-11         | 3.29  |
| XI         | VI-Y6C7R8  | Y6C7     | YIlc17_E5     | 0.18                      | Y55            | 0.58                      | 3.1e-11         | 3.24  |
|            |            | C7R8     | YIlc17_E5     | 0.17                      | Y55            | 0.3                       | 6.3e-09         | 1.78  |
| XI         | VI-R8Y9C10 | R8Y9     | YIlc17_E5     | 0.23                      | Y55            | 0.79                      | 6.7e-10         | 3.4   |
|            |            | Y9C10    | YIlc17_E5     | 0.24                      | DBVPG6044      | 0.79                      | 3.0e-10         | 3.3   |

**Supp Table 2:** Diversity of recombination rate for each interval flanked by fluorescent markers. Lowest strain, highest strain: strains with lowest and highest recombination rates. *p*-value: *p*-value for strain effect (ANOVA). Ratio: ratio between recombination rates of the most and the least recombining strains for each interval.

| Genome wide |            | All intervals |            | All intervals of a chromosome |       |            | Each interval   |       | DSB hotspots within interval |       | 30kb surrounding the interval |       |            |
|-------------|------------|---------------|------------|-------------------------------|-------|------------|-----------------|-------|------------------------------|-------|-------------------------------|-------|------------|
| $R^2$       | $p$ -value | $R^2$         | $p$ -value | Chromosome                    | $R^2$ | $p$ -value | Interval number | $R^2$ | $p$ -value                   | $R^2$ | $p$ -value                    | $R^2$ | $p$ -value |
| 0.54        | 9.5e-05    | 0.43          | 9.00e-04   | I                             | 0.22  | 0.034      | 1               | 0.24  | 0.023                        | 0.01  | 0.66                          | 0.05  | 0.33       |
|             |            |               |            |                               |       |            | 2               | 0.15  | 0.087                        | 0.03  | 0.43                          | 0.46  | 0.0007     |
|             |            |               |            | VI                            | 0.62  | 1,00E-05   | 3               | 0.74  | 0                            | 0.44  | 0.0007                        | 0.53  | 0.0001     |
|             |            |               |            |                               |       |            | 4               | 0.26  | 0.016                        | 0.18  | 0.045                         | 0.38  | 0.002      |
|             |            |               |            |                               |       |            | 5               | 0.04  | 0.38                         | 0.22  | 0.029                         | 0.04  | 0.38       |
|             |            |               |            |                               |       |            | 6               | 0.45  | 0.0006                       | 0.34  | 0.004                         | 0.05  | 0.34       |
|             |            |               |            | XI                            | 0.19  | 0.044      | 7               | NA    | NA                           | NA    | NA                            | NA    | NA         |
|             |            |               |            |                               |       |            | 8               | 0.01  | 0.6                          | 0.07  | 0.23                          | 0.15  | 0.071      |
|             |            |               |            |                               |       |            | 9               | 0.03  | 0.42                         | 0.24  | 0.019                         | 0.02  | 0.52       |
|             |            |               |            |                               |       |            | 10 / 11         | 0.28  | 0.01                         | 0.02  | 0.56                          | 0.01  | 0.73       |
|             |            |               |            |                               |       |            |                 | 0.24  | 0.02                         | 0.01  | 0.70                          | 0.01  | 0.54       |
|             |            |               |            |                               |       |            | 12              | 0.48  | 0.0003                       | 0.64  | 8,00E-06                      | 0.13  | 0.103      |
|             |            |               |            |                               |       |            | 13              | 0.69  | 3,00E-06                     | 0.25  | 0.022                         | 0.33  | 0.0065     |
|             |            |               |            |                               |       |            | 14              | 0.17  | 0.064                        | 0.18  | 0.053                         | 0     | 0.88       |
|             |            |               |            |                               |       |            | 15              | 0.43  | 0.0016                       | 0.29  | 0.014                         | 0.54  | 0.0002     |
|             |            |               |            |                               |       |            | 16              | 0.16  | 0.08                         | 0.3   | 0.011                         | 0.06  | 0.306      |

**Supp Table 3:** Correlation between recombination rate and sequence similarity at different scales. Genome-wide: considering average genome-wide sequence similarity with recombination rate averaged over all intervals. All intervals: considering average sequence similarity within all intervals with recombination rate averaged over all intervals. All intervals of a chromosome: same as before, but for each chromosome separately. Each interval: considering sequence similarity and recombination rate within each interval. DSB hotspots within interval: considering sequence similarity within DSB-rich regions in each interval with recombination rate in the corresponding interval. 30Kb surrounding the interval: considering sequence similarity in 30kb flanking sequences outside each interval on both sides, with recombination rate in the interval.

| Cross           | Y (cM) | $\mu$ | $\alpha S$ | GCA  |      | SCA/INB | Residuals (cM) |
|-----------------|--------|-------|------------|------|------|---------|----------------|
|                 |        |       |            | P1   | P2   |         |                |
| SK1 X SK1       | 42.6   |       | 44.44      | -3.2 | -3.2 | -36.67  | 0.17           |
| YPS128 X YPS128 | 55.7   | 41.4  | 44.44      | -3.4 | -3.4 | -23.28  | 0.02           |
| SK1 X YPS128    | 38.1   |       | 1.11       | -3.2 | -3.4 | 1.94    | -0.25          |

**Supp Table 4:** Measured recombination rate (Y), and estimated values of the diallele model parameters (see text). SCA/INB: value of SCA for the hybrids or INB for the homozygotes.
